# Supplementary material for: Emission of trace gases and aerosols from biomass burning –An updated assessment
Source: Copernicus journal article supplement (doi:10.5194/acp-2019-303), 2019-04-04
Supplement: Supplementary file 1 [file Andreae-BB-EmFactors-Supplement-2019.xlsx]

## Sheet: Readme
Column1
Please cite this information as: Andreae, Meinrat O.: Biomass Burning Emission Factors. https://edmond.mpdl.mpg.de/imeji/collection/op2vVE8m0us_gcGC
and include reference to: Andreae, M. O., Emission of trace gases and aerosols from biomass burning – An updated assessment: Atmos. Chem. Phys., submitted, 2019.
Updates of this dataset are produced periodically. Look in the Edmond database at the link above or contact me for the latest version at m.andreae@mpic.de
The references to the individual studies are in the sheet "References"

## Sheet: Orig.Data
Column1	Column2	Column3	Column4	Column5	Column6	Column7	Column8	Column9	Column10	Column11	Column12	Column13	Column14	Column15	Column16	Column17	Column18	Column19	Column20	Column21	Column22	Column23	Column24	Column25	Column26	Column27	Column28	Column29	Column30	Column31	Column32	Column33	Column34	Column35	Column36	Column37	Column38	Column39	Column40	Column41	Column42	Column43	Column44	Column45	Column46	Column47	Column48	Column49	Column50
Source	VegType	EF(CO2)	EF(CO2)	EF(CO)	EF(CO)	MCE	CO/CO2	EF(CH4)	CH4/CO	CH4/CO2	EF(VOC)	VOC/CO	VOC/CO2	VOC	C2H2	C2H4	C2H6	C3H4	C3H6	C3H8	1-butene	i-butene	tr-2-butene	cis-2-butene	butadiene	n-butane	i-butane	1-pentene	2-pentene	n-pentane	Me-Butenes	2-Me-butane	pentadienes	Isoprene	cyclopentene	cyclopentadiene	4-me-1-pentene	2-me-1-pentene	1-hexene	hexadienes	n-hexane	isohexanes	heptanes	octenes	Terpenes	benzene	toluene	xylenes	ethylbenzene
		g/kg dm	std.dev.	g/kg	std.dev.		mmol/mol	g/kg	mol/mol		g/kg			def															cis&trans					2-me-1,3-butadiene
Molec. Weight		44.01		28.01				16.04		16.04	15				26.04	28.05	30.07	40.06	42.08	44.1	56.11	56.11	56.11	56.11	54.09	58.12	58.12	70.13	70.13	72.15	70.13	72.15	68.12	68.12	68.12	66.105	84.16	84.16	84.16	82.15	86.17	86.17	100.21	112.22	136.24	78.11	92.14	106.17	106.17
Savanna and Grassland										1	0.0371927	1
Akagi &al, 2012; #9200	Calif. chaparral			75.1288		0.933445	71.3	1.84159	87.2						0.175621	0.890244			0.500822
Alves & al, 2010 #7136	Medit. Shrubland	1700		34		0.969533		1.5									1.3
Anderson & al, 1996, #1544	savanna + grassland
Andreae & al, 1996, #1377	savanna + grassland					0.948767
Andreae, 1996, #1609	savanna , Afr.	1600		54.989		0.948767	54	2.21593		3.8
Andreae & al, 1998, #1389	Sav. + Gras.,Afr.
Atlas & al., unpubl.	savanna																																													0.93	0.7
Aurell & al 2013 #9787	SE US prescribed																		0.467						0.178																					0.384	0.221		0.029
Aurell & al 2015 #9786	Florida grassland	1711		78		0.93316													0.232						0.093																0.002					0.222	0.086		0.016
Bertschi & al., 2003 #4398	Miombo + RSC mix	1685		78		0.932198		3.6							0.22	0.95	0.44		0.2
Blake & al, 1996, #1832	near Maraba, Brazil (BFA expt)			36.8795		0.966184	35	2.6073	123.457						0.139682	0.588179	0.39103	0.029954	0.280444	0.107527	0.0592844	0.0383068	0.0218896	0.0164172	0.072097	0.0188948	0.00604634			0.00457391		0.00222831														0.165058	0.0928595
Blake & al, 1996, #1542	savanna + grassland, Afr			65.3294		0.94162	62	3.07736		5.1					0.28	0.5	0.38	0.03		0.105						0.024	0.007			0.001																0.25	0.114
Bonsang & al,1991, #837	savanna , W. Afr							2.74025	68.9						0.974954	1.73876	0.285561	0.0281102	0.356836	0.0360844	0.059824	0.0228166	0.0104344	0.0082084	0.13814	0.00489972	0.00115287	0.0102594		0.00196787	0.00765108			0.0287138					0.0150247		0.0961468	0.0512783
Bonsang & al., 1995, #1540	W. Africa			66.4884		0.940645	63.1	2.65498		4.4	3.89442		6.9		0.777482		0.30057		0.400589	0.0610645
Brunke & al, 2001 #3796	Fynbos			57.7427		0.948047	54.8
Burling & al 2011 #7339	SW US; chaparral, emory oak savanna	1674		74		0.935054		3.69							0.21	1.01			0.53
Cachier & al, 1995, #1616	KNP			81.1349		0.928505	77
Cachier & al, 1995, #1616	W Afr			66.3831		0.940734	63
Cachier & al, 1996, #1703	savanna
Christian &al, 2003; #4703	Afr. Savanna, lab, representative of field
Cinnirella &al, 2006; #11232	Mediterranean macchie
Cofer & al, 1988, #102	chaparral
Cofer & al, 1989, #100	Chaparral, Lodi			65.3294		0.94162	62	3.67242		6.1	3.55577		6.3	total		0.32	0.16		0.1	0.07
Cofer & al, 1990, #230	grassy wetlands			50.5776		0.954198	48	1.87055		3.1	2.31355		4.1
Cofer & al, 1996, #1533	savanna + grassland			50.5776		0.954198	48	1.93089		3.2
Delmas & al, 1991, #508	Savanna, Africa							1.65		3.4
Delmas+Servant, 1982, #186	Savanna, Africa
Delmas &al, 1995; #1961	Savanna, Ivory Coast
Desservettaz & al 2017 #10259	Australia	1536		110		0.898858		5.6
Echalar & al, 1995, #1541	Savanna, Africa
Engle &al, 2006; #11235	Nevada sagebrush
Ferek & al, 1998, #2527	cerrado & grassld	1531.55	70.9661	59.3782		0.942581	60.9164	2.0462		3.66577	3.393		6.5	C2-C11	0.134693	0.625551	0.328925	0.0081526	0.344332	0.0962919	0.0786241	0.0686325	0.0311642	0.0262873		0.0257505	0.0091174			0.00902406		0.00474146		0.00996409												0.246721	0.183803	0.0483898	0.0218317
Friedli & al., 2000, #3563	chaparral							2.2272	56		2.48843			C2-C10	0.251809	0.695503	0.320604	0.0427116	0.266062	0.0984119	0.0347814	0.0278251	0.0153038	0.0403464	0.0370163	0.0273808	0.00792601	0.0191277		0.0107338	0.00469498	0.00626139		0.0287138	0.00472932				0.0333881		0.00598247		0.0521791	0.00333901	0.0162148	0.222726	0.125654	0.047385	0.015795
Friedli, 2009; #11226	S. Afr. Savanna
Gaudichet & al, 1993, #181	savanna; W. Afr.
Greenberg & al, 1984, #10	Cerrado			119.053		0.898473	113	3.62042		6	6.20708		11	total	1.07755	1.14912	0.858576		0.715091	0.255484																										0.448203	0.177023
Hao & al, 1996, #1604	savanna			72.6		0.935517	68.9282	2.1		3.48026					0.25	0.86	0.3		0.38	0.11	0.13		0.03	0.02	0.05	0.03	0.01	0.02		0.03		0.01			0.02				0.04		0.02					0.43	0.25	0.08
Hao & al, 1996, #3327	savanna; Zambia			61.8863	2.21454										0.318176	1.12901	0.384708		0.447626	0.133127	0.169382		0.0459751	0.0201645				0.0342614				0.00611922			0.0119042				0.0580704							0.271725	0.126928		0.0152619
Hao & al, 1993, #1158	savanna, Brazil							1.5		2.4859
Helas & al, 1995, #1148	savanna , W Afr			55.8461		0.949668	53	2.5343		4.2
Helas, unpubl.	S. Africa							2.20731	55.5						0.229857	1.41187	0.275868		0.38605	0.0809164
Hodgson & al 2018 #10744	Amazon	1711		74		0.936369	67.9636	2.23
Holder & al 2016 #9784	prescribed SE US
Hurst & al, 1994, #1500	savanna , Australia	1595		91.3619		0.917431	90	2.32527		4					0.124																															0.3
Hurst & al, 1994, #1532	savanna , Australia	1595		58.8776	22.3329	0.94518	58	2.26714		3.9	5.58637		9.9	total FID	0.103811	0.528622	0.250652			0.0607339						0.0252765						0.0313781														0.0566169
Johnson & al 2008 #10724	West African savanna and ag
Jost, 2002; Thesis	So. Africa
Koppmann & al, 1996; #1681	So. Africa																											0.0306031			0.0121357						0.0493894		0.0443238					0.00844314		0.239969	0.106461	0.0254616	0.00898645
Korontzi &al, 2003; #4755	dambo grassland	1707		64		0.945		2.29			2.67
Korontzi &al, 2003; #4755	miombo savanna	1687		74.8		0.935					2.14
Lacaux & al, 1993, #1203	savanna , W.Afr.			64.2757		0.942507	61	1.87055		3.1	4.00639		7.1	?
Lacaux & al, 1995, #1166	savanna , W.Afr.
Lacaux & al, 1996, #1928	savanna			49.5239		0.95511	47
Laursen & al., 1992, #1159	chaparral	1773	45	44	23	0.962471	38.9977	1		1.65727					0.11	0.11	0.19		0.3							0.011	0.006
Lawson & al. 2015, #9651	Australian coastal shrubland	1621		127		0.890392	123.116	3.8									0.41																													0.69	0.3	0.26
LeCanut & al, 1996, #1375	savanna + grassland
Lee & al, 1997, #2724	TRACE A
Lee & al 2005 #9783	Georgia, US, prescribed burn	1361		97.9		0.898455		3.57							0.31	1.047	0.43		0.39	0.14	0.078	0.06	0.024	0.018	0.08	0.025	0.009			0.011		0.004		0.071							0.007	0.003			0.25	0.296	0.21	0.108	0.029
Liley & al., 2003 #4514	Austral. savanna, BIBLE
Manoe & Andreae, 1994, #793	Chaparral
Masclet & al., 1995 #1545	savanna
May & al 2014, #9201	Chaparral, US
Mebust &al, 2011; #11263	shrubland, Calif & Nevada
Nguyen & al, 1995, #838	savanna; Ivory Coast
Nguyen & al, 1995, #838	pine, savanna; Vietnam
Paton-Walsh & al, 2010; #7095	Australian savanna														0.14		0.13
Rudolph & al, 1995, #1362	West Africa			89.5644		0.921659	85	5.00825		8.3							0.826903		0.874604	0.148064
Saarnak & al., 2003 #6753	Andropogon, Ghana	1430		43		0.954885
Shirai & al, 2003 #4391	Austral. savanna, BIBLE	1613		88		0.921047	89	2.22							0.237251		0.264522			0.0803593						0.0200857	0.00876469			0.00634693											0.0113704		0.00535217			0.211045	0.0810543	0.0193464
Sinha & al., 2003, #1750	S. Africa, SAF2000	1700		68		0.940867	72	1.7		3.9	3.4				0.22	0.99	0.21		0.23	0.054	0.041		0.013	0.0097	0.052	0.016	0.005		0.007	0.0045	0.107			0.042				0.0035			0.013		0.007			0.18	0.13
Sinha &al, 2004; #11243	miombo savanna	1705		73		0.936968		1.4		1.7					0.16	0.43	0.19		0.17	0.048	0.034		0.01	0.0072	0.039	0.013	0.004		0.0052	0.0041	0.0122	0.0011		0.053				0.0028			0.0101		0.0056			0.13	0.15
Sinha &al, 2004; #11243	dambo grassland	1759		42		0.96384		0.5		1.1					0.16	0.38	0.078		0.1	0.016	0.019		0.0038	0.0028	0.027	0.0048	0.001		0.0016	0.0019	0.0051	0.00081		0.036				0.0003			0.0071		0.004			0.089	0.11
Smith & al. 2014 #9191	N Australia	1674	56	87	33	0.924506		2.1							0.11	0.49	0.08
Stockwell & al 2015 #10072	lab, adjusted to field, sav. grass							2.27							0.25	1.14			0.347		0.106				0.141									0.154											0.031	0.253	0.174
Stockwell & al 2015 #10072	lab, adjusted to field, chap.	1656		82.7		0.927243		3.1							1.16			0.344	0.571		0.167				0.205									0.536											0.076	0.795	0.416
Strand & al 2016 #9785	Florida grassland	1741		56.7		0.95132		1.66
Tereszchuk &al,2011; #11342	Austral. savanna, remote s.														0.144404		0.60187
Urbanski & al 2009 #9781	Grass & shrub, SE & MW US	1688		69.2		0.939485		2.13							0.4	1.19	0.26	0.06	0.43	0.09
Wang &al, 2017. #10348	N. Australia, savanna
Wang &al, 2017. #10344	Australia
Ward & Hardy, 1989, #3304	Chaparral, Lodi	1665		61		0.945569		2.5			3.5
Ward & al, 1992, #1326	savanna , Brazil	1722		58		0.949738	53	1.31		2.1
Ward & al, 1996, #1605	savanna	1701	35	75.8	19.3	0.934565	70.026	2.5		4.14316	2.7			C2-C6
Ward & al, 1991, #505	savanna	1783		24.5		0.978866	21.5928	0.56		0.928069
Whitburn &al, 2017; #10342	trop. savanna + woody sav.
Wooster & al, 2011 #7322	KNP savanna	1665		101		0.912982	96	2.5		4.5
Yamasoe & al., 2000, #1885	cerrado
Yokelson & al., 2003 #4417	Sthn. Africa			71.5				2.19								1.19
Yokelson & al, 2011 #7338	Savanna, Mexico	1660		79.28		0.930198		3.74							0.243	0.913	1.371		2.474
Yokelson & al., 2013 #8782	semiarid shrubland	1674		73.8		0.935218		3.69			25.2			incl. unidentif.	0.213	1.01	0.48	0.0283	0.532	0.889	0.091	0.026	0.016	0.015	0.121	0.045	0.021	0.018	0.044	0.017	0.025	0.009	0.048	0.046	0.041	0.026		0.067	0.067	0.006	0.009	0.003	0.0211	0.052	0.146	0.451	0.174	0.099	0.04
Sthn. Africa
Average		1655.6		69.4512		0.938305	65.7497	2.45357	0.0549547	3.67752	3.52731				0.320903	0.851474	0.410671	0.0714036	0.462518	0.134003	0.0821458	0.0405968	0.0201425	0.0167385	0.0948657	0.020792	0.00738518	0.0220419	0.01445	0.00655878	0.024826	0.00756385	0.048	0.100539	0.0194084	0.026	0.0493894	0.0184	0.0429678	0.006	0.01817	0.0190928	0.0158719	0.0212607	0.103843	0.330094	0.196439	0.0859478	0.0219844
Std.Dev.		92.1176		20.5788		0.0184274	21.9512	1.0132		1.66386	1.2151				0.294883	0.378453	0.320506	0.111116	0.446609	0.184896	0.0491936	0.0192876	0.0120818	0.0104076	0.0572942	0.0106659	0.0050052	0.00883669	0.0198275	0.00822359	0.0368836	0.00891585	-	0.15801	0.0156879	-	-	0.0324291	0.0183786	-	0.0278153	0.0278735	0.0188753	0.026743	0.0960457	0.222542	0.143769	0.0774396	0.0100803
N		31		49		48	29	47		24	13				28	25	28	8	26	20	13	6	11	11	13	14	13	6	4	11	7	10	1	10	4	1	1	4	6	1	10	3	6	3	5	18	16	8	8
Tropical Forest								0.589134		1	0.0561153	1
Andreae & al, 1988, #12	Amazon forest			87.4349		0.921659	85
Andreae & al, 2000, unpubl.	Indonesia
Andreae &al, 2012; #7337	Amazon, BARCA			67.4792		0.938438	65.6
Andreae &al, 2019; unpubl.	Amazon, ACRIDICON
Babbit & al., 1996, #6500	Amazon deforestation	1649		86		0.924262	81.9544	5.1	0.0922481		3.5
de Gouw & al, 2003 #4537	Yucatan
Ebinghaus &al, 2007l #	trop. S. America
Ferek & al, 1998, #2527	Amazon forest	1439.13		94.5338		0.906445	103.224	6.1353	0.100957	11.6972	6.75		13.7615	C2-C11	0.214439	0.995915	0.523669	0.0129794	0.548197	0.153303	0.125174	0.109267	0.0496153	0.041851		0.0409964	0.0145155			0.0143669		0.00754869		0.0158634												0.392796	0.292625	0.0770396	0.0347574
Graham & al., 2002 #3608	Amazon forest
Greenberg & al, 1984, #10	Amazon forest			122.409		0.893655	119	6.48047	0.0823529	11	6.61122		12	total	0.105207	1.53785	0.914202		0.65171	0.914619																										0.396578	0.20049
Guyon & al, 2005, #4744	Amazon deforestation, RSC corr.			90	9	0.917431	90
Hao & al, 1993, #1158	Amazon							9.3
Haumann & al, #7975	Amazon
Hodgson & al 2018 #10744	Amazon	1447		237		0.795326	257.38	5.17
Koppmann & al., #1681	Subtropical Forest, S. Africa							2.23																				0.0576981			0.0752136						0.0488396		0.0649134					0.0123652		0.420773	0.221424	0.0424073	0.0136483
Melendez-Perez &al, #11233	Amazon, prescribed
Pöhlker &al 2018; #10851	Amazon, deforestation
Prasad & al., 2000 #3741	India, shifting cultivation			93.304		0.88968	124
Soares Neto & al., 2009; #6578	Amazon deforestation	1629		112.2		0.902347	108.235	9.2	0.12755		5.57
Tereszchuk &al,2011; #11342	Amazon forest, remote s.														0.157941		0.651374
Tereszchuk &al,2011; #11342	Congo forest, remote s.														0.231271		0.819428
Ward & al, 1991, #505	Deforestation	1664	78	88.3	38.1	0.92304	85	4.8	0.0845602	8.2
Ward & al, 1992, #1326	prim. forest	1581		127		0.88793	126.231	9	0.110236
Ward & al, 1992, #1326	sec. forest	1664		88.5		0.922879	83.5766	4.8	0.0843691
Whitburn &al, 2017; #10342	tropical evergr. broadl. forest
Yamasoe & al., 2000, #1885	Braz. forest
Yokelson & al, 2009 #6574	Yucatan deforestation	1656		82.7		0.927243	78.4765	5.91	0.111165							1.048	1.07		1.35
Yokelson & al, 2008 #6308	Deforestation	1601		107.8		0.904327	105.809	6.25	0.0901876						0.27	0.98	1.01		0.5		0.02		0.016	0.02										0.42												0.3	0.22	0.14	0.08
Yokelson & al, 2011 #7338	Trop. dry forest,	1657		87.13		0.923685	82.6304	5.682	0.101442						1.142	0.969	1.187		1.263
Average		1616.44		104.786		0.905223	106.408	6.15829	0.0914202	10.2991	5.60781				0.353476	1.10615	0.882239	0.0129794	0.862581	0.533961	0.0725872	0.109267	0.0328076	0.0309255	-	0.0409964	0.0145155	0.0576981	-	0.0143669	0.0752136	0.00754869	-	0.217932	-	-	0.0488396	-	0.0649134	-	-	-	-	0.0123652	-	0.377537	0.233635	0.0864823	0.0428019
Std.Dev.		69.9609		39.8089		0.033914	45.4998	2.01695		1.85099	1.50064				0.390608	0.24322	0.23498	-	0.410086	0.15-0.91	0.020-0.125	-	0.016-0.050	0.020-0.042	-	-	-	-	-	-	-	-	-	0.016-0.42	-	-	-	-	-	-	-	-	-	-	-	0.0531561	0.0404698	0.0494768	0.0338994
N		9		15		15	15	13		3	4				6	5	7	1	5	2	2	1	2	2	0	1	1	1	0	1	1	1	0	2	0	0	1	0	1	0	0	0	0	1	0	4	4	3	3
Temperate Forest								0.57241		1	0.0606464	1
Akagi & al., 2013 #7725	So Carolina pine, aircraft	1675		79		0.931007		2.66			12.3				0.2	1.17	0.489	0.056	0.52	0.153	0.131	0.068	0.035	0.028	0.26	0.036	0.01	0.03	0.025	0.019	0.057		0.023	0.14	0.045						0.012	0.01	0.008	0.022	1.72	0.283	0.199	0.105	0.039
Akagi & al., 2013 #7725	So Carolina pine, ground, RSC	1452		173		0.842314		9.01			34.2				0.38	1.22	2.72	0.031	0.82	0.802	0.248	0.272	0.112	0.069	0.11	0.195	0.069	0.065	0.061	0.095	0.142		0.025	0.06	0.07						0.062	0.094	0.043	0.066	6.21	0.803	0.579	0.366	0.072
Akagi & al., 2014 #9991	So Carolina pine, ground	1647		100.6		0.912432		2.68			12.46				0.48	1.65
Alves & al. 2011 #7388	Portugal, ground level	1341		231		0.786994					"102"
Alves &al, 2011; #11219	Portugal, mixed evergreen	1485	147	170	83	0.84755
Andreae & al, 1996, #1377	Subtr. For., Drakensberg			96.6928		0.914077	94	6.06808	0.0976208	10.3	7.54781		13.7
Andreae & al, 1998, #1389	Subtr. For., Drakensberg
Aurell & al 2015 #9786	Florida longleaf pine forest	1654		114.5		0.9019													0.32						0.126																0.006					0.28	0.126		0.02
Aurell & al 2017; #10350	timber slash, wet & dry avg	1737		55.5		0.952197		3.4			2.359								0.4						0.131																					0.436	0.174	0.054	0.025
Balachandran & al 2013 #9782	SE US prescribed	1384		82.2		0.914645		2.8							0.44	1.07	0.228		0.323	0.0558	0.058	0.043	0.015	0.011	0.081	0.01516	0.00662	0.086	0.012	0.0069	0.014	0.0055		0.074				0.03			0.006	0.006	0.004			0.237	0.12
Biswas &al, 2007; #11236	Wyoming forest, mixed
Biswas &al, 2008; #11237	Washington
Collier & al 2016, #10068	Pac NW forests			98.8453		0.910001	98.9
Crutzen & al., 1979, #5	Colorado, temperate forest
de Gouw & al, 2003 #4537	Utah, coniferous																																													0	0
Eagan & al., 1974, #238	forest slash, Washington
Einfeld & al, 1991, #504	Montana fir	1621	74	96.9	43.7	0.91414	93
Engle &al, 2006; #11235	Sierra Nevada, USA
Evtyugina & al 2013; #7936	Portuguese forests	1377		222		0.797885					8.5																							0.207							0.136	0.081	0.084		0.33	0.747	0.567	0.194	0.07
Friedli & al., 2001, #3563	N. America			111.15				3.81902	60		5.75472			C2-C10	0.222165	1.10196	0.793508	0.0413315	0.626186	0.328998	0.15586	0.111329	0.0512111	0.131368	0.062246	0.106091	0.0299823	0.06679		0.0601246	0.033395	0.0257677		0.10272	0.0189221				0.106869		0.0341942		0.0318125	0.00534377	0.22274	0.418443	0.484463	0.204334	0.0484502
Friedli & al, 2003 #4532	Washington State
Guerette & al 2018; #10645	Australian temperate forest	1650	170	101	16	0.912261		3.2							0.35	1.15	0.49								0.23																				0.5	0.39	0.23
Hao & Babbitt 2007 #11074	temp. forest, RSC	1398		259		0.774538		12.35								1.305			1.03
Hegg & al, 1990, #391	temp forest, N. Am.	1642	37	91		0.919898	87	2.9		7.5					0.24		0.47		0.51	0.24
Hobbs & al, 1996, #2469	NW USA, 4 fires	1312.05		134.448		0.861322		11.5789		24.2689	19.1812
Hornbrook & al., 2011 #7452	N. California			99.9446		0.909091	100										0.708148			0.251771						0.0559933	0.0172127			0.0283188		0.0308933														0.334452	0.210414
Howard &al, 2019; #11248	Australia, eucalypt forest
Hurst & al, 1996, #2467	Australia	1434		97.7		0.903302	107.063	3.7		7.09554
Laursen & al., 1992, #1159	N. America	1726	56	103.7	26.9	0.913742	94.4132	4.3		6.8511					0.27	0.27	0.64		0.68							0.067	0.023
Lee & al 2005 #9783	Georgia, US, prescribed burn	1361		97.9		0.898455		3.57							0.31	1.047	0.43		0.39	0.14	0.078	0.06	0.024	0.018	0.08	0.025	0.009			0.011		0.004		0.071							0.007	0.003			0.25	0.296	0.21	0.108	0.029
Liu & al 2017 #10260	western US	1454		89.3		0.911993		4.9							0.24	0.91	0.72		0.35	0.24	0.08	0.043	0.0068	0.0067	0.055	0.061	0.016	0.026		0.03		0.01		0.038							0.021	0.0071	0.014		0.41	0.43	0.24	0.124	0.026
Martins & al., 1996 #3462	Pacific NW, USA
May & al 2014, #9201	Montane Forest, US
May & al 2014, #9201	SE Forest, US
Miner, 1969, #99	USA
Müller & al 2016, #9747	Pine, oak, GA	1643		94.6	31.3	0.917038		6.25																																						0.4
Paton-Walsh & al, 2005 #6419	SE Australia, forest														0.34	0.61	0.26
Paton-Walsh & al, 2008 #6448	SE Australia, forest
Paton-Walsh & al, 2014 #9190	SE Australia, forest	1620	30	118	16	0.897306		3.6								1.3	0.5
Radke & al, 1988, #218	Forest, N Am, OR, WA
Radke & al, 1990, #722	Forest, N Am, OR, WA
Radke & al, 1991, #981	Forest, N Am, OR, WA	1650	29	83	16	0.926752		3.2		5.33333					0.24		0.46		0.53	0.21
Reisen & al 2018, #10926	Eucalypt forest, Austr., flaming	1726		64.5		0.94454		2.2
Reisen & al 2018, #10926	Eucalypt forest, Austr., smoldering	1499		190.3		0.833702		12.5
Robertson & al 2014; #9193	N. Florida (Tall Timbers)			61.9657		0.94162	62
Sahu & al, 2012, #7813	California, ARCTAS			113.737		0.897827	113.8
Selimovic &al, 2019; #11354	Montana							10.7653	166						0.147395	1.32688
Stith & al., 1981, #420	slash burn, OR & WA
Strand & al 2016 #9785	Florida longleaf pine forest	1651		108.4		0.906485		4.32
Susott & al, 1990, #506	logg. slash	1673		86		0.925268	82
Urbanski, 2013, #7929	NW US wildfires	1596		135		0.882687		7.3
Urbanski & al 2009 #9781	prescibed SE conifer	1667		78.7		0.930944		2.06							0.35	1.04	0.24	0.05	0.42	0.08
Urbanski & al 2009 #9781	prescribed interior western conifer	1629		94.9		0.916142		3.77							0.31	1.19	0.55	0.07	0.62	0.21
Vicente &al, 2011; #11217	Portugal, pine & undergrowth	1200	172	268	92	0.740244
Vicente &al, 2012; #11218	Portugese forests, EF OC from Alves &al 2011
Vose & al, 1996, #2465	Pine, SE US	1609		46.8		0.956296	45.7072	5.8		9.91299	3.8
Vose & al, 1996, #2465	Hardwoods	1673		86.1		0.925187	80.8727	4.4		7.23252	2.3
Vose & al, 1996, #2465	Conifer, NW
Wang &al, 2017. #10348	E. Australia, euc. Forest
Ward&Hardy, 1986, #724	Conifer slash			130.927		0.884173	131	5.25423		9.2	3.90855		7.3
Ward&Hardy, 1991, #487	Sundance Fire, Idaho	1511.74		147.75		0.866879	153.583	5.1		9.27738					0.45		0.74		0.89	0.45
Woodruff &al, 2010; #11238	Minnesota organic soils
Worden & al., 1997, #1861	Wildfires, Oregon, California
Yates & al 2016, #9669	Rim Fire, Yosemite	1675		92.5		0.920159		4.89																																						0.4	0.26
Yedinak 2013 #9255	Longleaf pine, NC	1600		73.6		0.932595		7.4
Yokelson & al., 1999, #3313	Eastern US	1676		85.9		0.925472		4.67313	95	7.66773						1.24733
Yokelson & al., 2007 #6161	pine forests, Mexico	1662		82.9		0.927324		4.96							0.19	0.94	0.58		0.5	0.386	0.078	0.081	0.029	0.021	0.067	0.183	0.067			0.026		0.022
Yokelson & al, 2011 #7338	pine-oak forests, Mexico	1603		102.9		0.908381		5.7							0.358	1.074	1.73		2.05
Yokelson & al., 2013 #8782	Pine forest understory, SE & SW US	1668		72.2		0.93632		3.01			27.6			incl. unidentif.	0.298	1.16	0.541	0.0253	0.405	0.293	0.1	0.057	0.0304	0.0254	0.111	0.101	0.0725	0.0265	0.057	0.0368	0.046	0.027	0.035	0.066	0.0327	0.029		0.0603	0.0622	0.006	0.0211	0.0049	0.027	0.047	0.253	0.184	0.141	0.132	0.0385
Yokelson & al., 2013 #8782	Coniferous canopy	1670		85.3		0.925708		3.27			34.45			incl. unidentif.	0.433	1.56	0.417	0.0696	0.497		0.172	0.036	0.0314	0.0277	0.192	0.0512	0.0152	0.0325	0.058	0.0225	0.041	0.0073	0.058	0.097	0.0386	0.025		0.084	0.0842	0.0061	0.0143	0.0011	0.017	0.039	0.619	0.617	0.249	0.142	0.0396
Temp. Forest Average		1570.56		113.247		0.897751	95.9528	5.20441	80.4234	9.51268	13.4124				0.312428	1.11711	0.685333	0.0490331	0.625326	0.274326	0.122318	0.0857032	0.0372012	0.0375742	0.125437	0.081495	0.0305014	0.0475414	0.0426	0.0335643	0.0555658	0.0165576	0.03525	0.09508	0.0410444	0.027	-	0.0581	0.084423	0.00605	0.0319594	0.0258875	0.0286016	0.0358688	1.1683	0.390993	0.252658	0.158815	0.040755
Std.Dev.		134.427		50.4145		0.04737	26.6186	2.82315		5.11591	11.7508				0.0942601	0.298738	0.57279	0.0176061	0.396328	0.186986	0.0610518	0.0735703	0.0306891	0.0394326	0.0676608	0.0600268	0.0259011	0.0244782	0.0225233	0.0261244	0.0447121	0.0109392	0.0160494	0.0511915	0.0188353	0.025-0.029	-	0.0270671	0.0223354	0.006-0.006	0.040347	0.0382778	0.0258198	0.0232686	1.94693	0.201275	0.16527	0.090079	0.0180589
N		39		46		45	14	36		11	13				20	20	20	7	19	14	9	9	9	9	12	11	11	7	5	10	6	8	4	9	5	2	0	3	3	2	10	8	8	5	9	16	15	9	10
Boreal Forest								0.557133		1	0.0649858	1
Adams &al 2019; #11258	Alberta			120
Alvarado & al, 2010; #10394	Can. boreal forest
Andreae & al, 2000, unpubl.	Finland
Bertschi & al., 2003 #4398	Boreal for. + RSC mix	1548		100		0.907853		5.9		10.4813					0.12	1.47	1.69		0.45
Blake & al, 1994, #1171	Boreal for., Canada; ABLE 3B														0.574055	1.93749		0.0905109	0.628852	0.30888	0.144885	0.0814976	0.0181106	0.0126774	0.130939	0.136943	0.0187593	0.0679074		0.0768497		0.0465756							0.108657		0.0917829					0.932825	0.484761
Cinnirella &al, 2006; #11232	Siberia
Cofer & al, 1989, #100	Boreal for., Tyranite			67.1213		0.935454	69	3.72433		6.7	3.17888		6.1	total
Cofer & al., 1990, #3305	Boreal for., Thomas & Peterlong			90.4679		0.914913	93	5.16959		9.3	4.58593		8.8
Cofer & al, 1991, #408	Boreal for. (Morley L.)
Cofer & al, 1996, #1533	Boreal for.			92.4134		0.913242	95	5.08621		9.15
Cofer & al, 1996, #2468	Boreal for.	1586	78	121	40	0.892959	119.888	3.9		6.7623	2.9			total
Cofer & al, 1998, #3323	Boreal slash/tramp; smold.	1520		102.5		0.904197		5.55		10.0411	5.55
Cofer & al, 1998, #3323	Bor Island; smoldering	1300		235		0.778799		4.45		9.41346	5.5
Cofer & al, 1998, #3323	boreal crownfires;smoldering	1370		142		0.859951		5.1		10.2372	5.7
de Gouw & al, 2005 #5054	Boreal for., N. America
FIRESCAN 1996, #2367	Bor Island Fire			143.387	32.3247	0.871536	147.4	3.44639		6.2
Friedli &al, 2003; #5587	Quebec, pine
Goode & al., 2000, #3326	Alaskan forest	1660		88.8		0.922466		2.79		4.62199					0.24	1.8
Hao & Babbitt 2007 #11074	Boreal forest, RSC	1436		244		0.78928		8.4								1.23			0.99
Harden &al, 2004; #11230	Alaska, conif. prescribed
Hornbrook & al., 2011 #7452	Asia & Siberia			98.25		0.908265	101										0.738331			0.386721						0.12232	0.0693145			0.0379618		0.048085														0.263025
Hornbrook & al., 2011 #7452	Canada boreal			139.107		0.874891	143										0.821354			0.350423						0.118343	0.0346371			0.0573311		0.0214992														0.543086	0.23795
Landis &al, 2018; #10334	Alberta, Canada							7.22711			10.9826
Le Breton & al, 2013 #7976	Canada boreal forest
Lefer & al, 1994, #1127	tundra, forest, Can. ; ABLE 3B
Lewis & al 2013, #7977	Canada boreal forest														0.233528	0.838511	0.66831		0.216945	0.240733	0.048618	0.0179887			0.0913921	0.0755394	0.0193885	0.0194451	0.00577277	0.0406356		0.0106278									0.0235193	0.00783975	0.0178001			0.473764	0.275438	0.114072	0.0459969
Lutsch &al, 2016; #11259	N. Canada																1.5
Manoe, 1995, #1381	Boreal F., Siberia (50% smold)																																													0.480214	0.428852
Manoe, Andreae, 1994, #793	Boreal Forest, Siberia
Nance & al, 1993, #1311	Wildfire, Alaska	1640	25	81	12	0.927985		1.5		2.51524					0.26		0.66		0.51	0.23
O'Shea & al, 2013 #8875	boreal forest, young plume	1512		189		0.835839		8.5
O'Shea & al, 2013 #8875	boreal forest, aged plumes	1668		96.1		0.91699		4.5
Rinsland &al, 2007; #11265	boreal forest																0.91
Schreier &al, 2015; #10359	remote sensing, N Am & Eurasia
Sigler & al., 2003 #8868	Quebec boreal forest
Simpson & al 2011 #7340	Boreal forest, Canada, ARCTAS	1616	180	113	72	0.901007		4.7							0.22	0.82	0.56	0.029	0.38	0.23	0.077	0.056	0.02	0.015	0.07	0.076	0.021			0.042		0.019		0.074							0.047	0.018	0.024		1.53	0.55	0.25	0.087	0.025
Singh & al, 1994, #1202	Boreal Forest ABLE-3B
Singh &al, 2010; #7631	ARCTAS, mostly bor.for.			103.486		0.903846	106.383
Tereszchuk &al,2011; #11342	Canada boreal forest, remote s.														0.108303		0.82985
Tereszchuk &al,2013; #11266	N. America														0.37229		0.794676
Tereszchuk &al,2013; #11266	Siberia														0.248194		0.898896
Turetsky &al, 2006; #11234	Alaska
Urbanski & al 2009 #9781	boreal Alaska	1644		95.5		0.916361		6.91							0.46	2.68	1.56	0.065	1.54	0.46
Vasileva & al 2017 #10400	Siberian taiga			122.569		0.888099	126	6.31707	90		9.94282	153
Viatte &al, 2015; #11264	N. America & Siberia														0.34		1.24
Virkkula &al, 2014; #10375	prescribed, Finland	1270
Ward & al, 1990, #509	bor. forest, Canada	1631		85		0.924313	82	4.44		7.4862
Weiss-Penzias & al 2007 #8869	Alaskan forest
Wentworth &al, 2018; #10333	Alberta																				0.364635		0.0510489	0.0413253	0.0632714	0.216546	0.148561	0.0516511	0.0164068	0.0468872		0.0437614														0.744486	0.439104	0.115912	0.0432371
Wofsy & al, 1992, #494	Wildfire, Alaska							13.2034							0.214349		0.716511			0.152847						0.0302158
Boreal Forest Average		1528.64		121.35		0.889916	108.267	5.5407	79.903	7.7424	6.04253				0.28256	1.53943	0.970566	0.0615036	0.673685	0.294951	0.158784	0.0518287	0.0297198	0.0230009	0.0889007	0.110844	0.0519434	0.0463345	0.0110898	0.0502776	-	0.0315915	-	0.074	-	-	-	-	0.108657	-	0.0541007	0.0129199	0.0209	-	1.53	0.569629	0.352684	0.105662	0.038078
Std.Dev.		135.144		46.5714		0.0426728	25.5704	2.51418		2.48196	2.93911				0.134526	0.662908	0.369466	0.0309041	0.451711	0.10036	0.143054	0.0319593	0.0184957	0.0159118	0.0304825	0.0591658	0.0510974	0.0246647	0.006-0.016	0.0147003	-	0.0163984	-	-	-	-	-	-	-	-	0.0346814	0.008-0.018	0.018-0.024	-	-	0.213997	0.109899	0.0161875	0.0114096
N		14		22		21	10	20		12	8				12	7	14	3	7	8	4	3	3	3	4	7	6	3	2	6	0	6	0	1	0	0	0	0	1	0	3	2	2	0	1	7	6	3	3
Akagi & al, 2011; #7186	boreal forest average	1489		127		0.881824		5.96			58.7				0.18	1.42	1.79	0.059	1.13	0.44	0.16	0.11	0.04	0.03	0.14	0.12	0.042	-	-	0.085		0.038		0.15							0.055	0.036	0.048		3.1	1.11	0.48	0.18	0.051
Biofuel Use
Charcoal making
Brocard & al, 1996, #1725	Charc. Making, W Africa	440		70	19	0.800021	240	10.7		68			13	C2-C10
Christian & al., 2007 #6108	charcoal kiln, Brazil			66.5305		0.825083	212	67.886	1270						0.260336	2.61736			0.981626
Christian & al., 2010 #6887	charcoal kiln, Mexico	582		84.9		0.813534		11			53.3				0.05	0.79			0.85
Bertschi & al., 2002 #3916	Zambia	542		96.8		0.780873		13.4								1.31	3.4		1.5
Park &al, 2013; #10378	Commercial kilns, Korea			182
Pennise & al., 2001, #4080	Kenya earth mound kiln	495.055		61.2637		0.837212	194.466	12.2527			21.1996
Pennise & al., 2001, #4080	Brazil, hot tail & circ. Brick	456		108.8		0.727332	374.937	16.3			16.9917
Smith & al., 1999, #3557	CharcMaking, Thailand	382		59.5		0.803385	244.764	9.1			14.25
Ward & al., 1999, #3821	Zambia	555		110.3		0.762042	312.304	11.4112
Veldt, #1211	GEIA note														0.528707	1.32177	1.32177		0.79306	0.528707
avg. charcoal making		493.151		93.3438	19	0.793685	263.079	19.0063		68	26.4353		13		0.279681	1.50978	2.36088	-	1.03117	0.528707	-	-	-	-	-	-	-	-	-	-	-	-	-	-	-	-	-	-	-	-	-	-	-	-	-	-	-	-	-
Std.Dev.		71.4948		38.5811		0.0358106	68.0003	19.8657		-	18.1364				0.239939	0.778904	1.3-3.4	-	0.322374	-	-	-	-	-	-	-	-	-	-	-	-	-	-	-	-	-	-	-	-	-	-	-	-	-	-	-	-	-	-
N		7	0	9	1	8	6	8	1	1	4	0	1	0	3	4	2	0	4	1	0	0	0	0	0	0	0	0	0	0	0	0	0	0	0	0	0	0	0	0	0	0	0	0	0	0	0	0	0
IPCC Reference Manual				43.68
Industrial kiln, Missouri (EPA 1995)
Pennise & al., 2001, #4080	Brazil, industr. Kiln	197.455		58.9091				13.2727			8.69091
Shah & al. Industrial kiln		389.784		109.872
Charcoal burning
Brocard & al, 1996, #1725	Charc. Burn, W Africa	2250	530	210	84	0.872108	155	2.4		2.5	0.460227		0.6	C2-C10		0.193954	0.124753
Bertschi & al., 2002 #3916	Zambia	2402		134		0.91941		6.88							0.51	0.72	0.747
Bhattacharya et al, 2002; #10331	Asian cookstoves	2400		128		0.922681		8.4			7.12
Coffey & al, 2017 #11117	Ghana	2191		139.5		0.909059
Eilenberg &al, #10321	Uganda			266
Gadi &al, 2003; #11245	charcoal, India
Huang &al, 2016; #10332	Taiwan, indoor barbecue	934		152		0.796367
Jayarathne & al, 2018, #10811	Nepal, forced draft stove
Jetter &al, 2012; #11304	charcoal, various stoves	2706		225		0.884451		6.2			13.8
Keene & al. 2006 #5377	Southern Africa	2755		351		0.833207
Kituyi & al, 1999,#3172	Kenya, charcoal burning	2704.36		134.802		0.927369	78
Njenga &al, 2014; #10355	Kenya, charcoal burning	1564		214		0.823053
Veldt, #1211	GEIA note														0.131684	0.855947	0.987631		0.32921	0.164605	0.0395052	0.0263368	0.0164605	0.0164605	0.032921	0.0526736	0.0131684																			0.724263	0.197526	0.0987631	0.032921
Rasmussen & al, 1980, #231	charcoal burning, lab
Smith & al., 1993 #3424	charcoal burning, Indonesia	2740		230		0.883477	131.908	8			4
Smith & al., 2000 #4003	charcoal burning, India	2411		275		0.848022	179.238	8			10.5
Stockwell & al, 2016 #10812	Nepal, charcoal	3030		147		0.929171		1.48							0.307	0.271			0.701						0.203									0.217
Vicente &al 2018; #10328	Portugal barbecue	2619	110	219	45	0.883872		4.33								0.0556676	0.808344			0.0583468																					0.305748
Zhang & Smith, 1996 #1883	charcoal burning, Asia	2748.33		226		0.885579	129.221	8.3			3.625				0.132693	0.823283	1.05721		0.564979	0.297427	0.197623	0.155576	0.0630712	0.0343388	0.101672	0.0950923	0.0101625	0.0275907		0.0955192	0.0153282	0.0711888		0.0170158	0.0353078						0.0634975					1.7365	0.621427	0.225423	0.0735941
Zhang & al., 1999 #3302	charcoal burning. Asia			200
Zhang &al, 2000; #3635	charcoal, China	2450		275		0.850079
avg. charcoal burning		2497.91		207.43		0.87786	130.494	5.99889			6.5842		0.6		0.270344	0.486642	0.744987	-	0.53173	0.17346	0.118564	0.0909562	0.0397659	0.0253996	0.112531	0.0738829	0.0116655	0.0275907	-	0.0955192	0.0153282	0.0711888	-	0.117008	0.0353078	-	-	-	-	-	0.184623	-	-	-	-	1.23038	0.409477	0.162093	0.0532576
Std.Dev.		353.836		62.695		0.0407933	37.578	2.64678			4.91175				0.179771	0.352725	0.369143	-	0.188112	0.119786	0.040-0.20	0.026-0.16	0.016-0.063	0.016-0.034	0.0855579	0.053-0.095	0.010-0.013	-	-	-	-	-	-	0.017-0.22	-	-	-	-	-	-	0.063-0.31	-	-	-	-	0.72-1.7	0.20-0.62	0.099-0.23	0.033-0.074
N		14		17		15	5	9			6				4	6	5	0	3	3	2	2	2	2	3	2	2	1		1	1	1		2	1						2					2	2	2	2
Biofuel burning								0.554549		1	0.0444144	1
Alves & al., 2011 #7380	wood, fireplace
Alves & al., 2011 #7380	wood, woodstove
Ballard-Tremeer 1996, #4179	biofuel, open fires	2574		19			11.6
Ballard-Tremeer 1996, #4179	biofuel, stoves	2444		42			26.9
Bertrand &al, 2017; #10339	logwood stoves	1383						6.6			10.4
Bertschi & al., 2003 #3916	wood cooking fires	1525		96		0.909993		10.6							1.67	2.35	1.5		0.95
Bhattacharya et al, 2002; #10331	Asian cookstoves	1560		41.7		0.959693		11.3			9.63
Brocard & al, 1996, #1725	Biofuel, W Africa	1460	260	70	23	0.929945	79	2		3.8	2.83705		5.7	C2-C10		1.58072	0.914854
Cachier & al, 1996, #1703	Biofuel, Africa
Cao & al 2006, #6529	chinese crop residues	1724		80		0.932044
Cerqueira & al 2013 #7834	Wood stove
Chen &al, 2016; #10373	China, peat	2046		117		0.917557
Chen &al, 2016; #10373	China, wood	1446		123		0.882105
Christian & al., 2010 #6887	open wood cooking fire	1724	34	58.4	18.5	0.949465	54	3.35	102		4.13				0.27	0.7			0.18
Christian & al., 2010 #6887	Patsari stoves	1770		35.2		0.9697		1.5			1.68				0.28	0.46			0.03
Coffey & al, 2017 #11117	Ghana, wood	1580		57.7		0.945734
Crutzen & al, 1979, #5	wood			174.287		0.847458	180
Dasch, 1982, #3306	wood, fireplace			113
De Angelis & al, 1980, #98	wood
de la Sota &al 2019; #11226	Senegal, fuel wood
Du &al, 2017; #10370	wood gasifier stove	1500		43		0.9569		6.1
Du & al, 2018; #10323	crop residues	1415	191	117	64	0.88502		28	25
Du & al, 2018; #10323	woody fuels	1546	203	99	89	0.908583		24	23
Edgerton & al., 1986, #1361	wood, fireplace & stoves, US			118.128		0.891266	122	8.04097		14.5																								0.150727												2.13069	1.47172	0.532238	0.176189
Eilenberg &al, #10321	China, Kang, wood			43.8
Eilenberg &al, #10321	Honduras, wood			99.5
Eilenberg &al, #10321	Uganda, wood			125
Eilenberg &al, #10321	India, wood+dung			57.4
Evtyugina & al 2014, #8871	Europ. woods, stove & Fireplace	1686		85.8		0.925961					17.4																			0.011				0.054							0.0068	0.161	0.008		0.005	0.433	0.151	0.031	0.022
Fine & al., 2001, #4984	fireplace, NE US
Fine & al, 2002a #4463	residential wood, US; PM2.5
Fine & al, 2002b; #4983	fireplace, S US woods
Fine & al, 2004 #4982	woodstove, hard + softwood
Fleming & al, 2018a #10606	brushwood in cookstove
Fleming & al, 2018b #11017	brushwood in cookstove	1242		53		0.937164		4.8							0.467	0.626	0.38	0.038	0.286	0.095	0.063	0.035	0.02	0.015	0.077	0.016	0.0046	0.0096	0.015	0.0044	0.0057	0.01	0.0092	0.02					0.013		0.002	0.0024	0.0009		0.0019	0.373	0.221	0.036	0.0125
Goncalves &al, 2010; #11222	Portugal woodstove
Goncalves &al, 2012; #10354	Portugal, woodstove	1622		74.7		0.932521
Goncalves &al, 2012; #10354	Portugal, fireplace	1679		69.6		0.93885
Habib & al., 2004 #4617	wood fuel
Habib & al., 2004 #4617	crop waste
Habib & al., 2008 #5504	wood fuel, low burn rate
Habib & al., 2008 #5504	wood fuel, high rate
Habib & al., 2008 #5504	crop waste
Hedberg & al., 2002 #4374	birch wood																																													1.5	0.74	0.145
Hildemann & al., 1991, #3412	wood
Huang &al, 2011; #11216	China, crop residue + wood
Jayarathne & al, 2018, #10811	Nepal, hardwood
Jetter &al, 2012; #11304	wood	1766		42.1		0.963896		1.88			8.8
Jetter &al, 2012; #11304	ag. residue	1837		74.1		0.940398		3.15			11.2
Johnson & al., 2008 #6746	wood, open fire	1533.02		81.6958		0.922737		6.416			4
Johnson & al., 2008 #6746	wood, Patsari stoves	1588.03		42.015		0.960089		2.406			1.125
Kituyi & al, 1999,#3172	Kenya, wood	1579.38		70.8996		0.934114	71
Li &al, 2009; #11225	crop residue
Li &al, 2009; #11225	fuel wood
Liousse & al, 1996, #2464	Biofuel
Ludwig & al, 2003, #3161	Zimb., fuelwood	1649		100.286		0.912779	95
Marufu &al, 1999; #2476	Zimb., fuelwood, recalc. Yevich	1486		90		0.913107
McDonald & al 2000 #4981	fireplace softwood										5.8			tot VOC	0.31	0.71	0.47		0.24	0.107	0.084				0.062	0.017		0.01		0.009			0.007	0.039		0.027			0.011		0.006		0.004	0.001	0.39	0.22	0.13	0.066
McDonald & al 2000 #4981	fireplace hardwood										9.4				0.54	1.07	0.66		0.35	0.17	0.121				0.095	0.02		0.015		0.012			0.012	0.027		0.028			0.019		0.007		0.005	0.0004	0.041	0.31	0.14	0.06
McDonald & al 2000 #4981	woodstove, hardwood			129.4							21.8				1.12	2.53	1.43		0.67	0.16	0.148				0.197	0.001		0.019		0.013				0.043		0.128			0.02		0.012		0.005	0.0002	0.02	1.19	0.32	0.098
Pandey & al 2017 #10414	India, fuelwood
Pandey & al 2017 #10414	India, ag. residue
Roden & al., 2006 #5502	traditional stoves, field			119
Roden & al., 2009 #7288	Honduras, improved stoves, field			78.6
Saud & al., 2011 #7439	firewood
Saud & al., 2011 #7439	crop residue
Smith & al., 1993 #3424	wood	1560		99		0.909329	100	8			12
Smith & al., 2000 #4003	Acacia, India	1391		66.5		0.930132		3.9			7.8
Joshi, 1991; #515	India			39.2302		0.961062	40.5161
Delmas & al, 1991, #508	Africa							5.4
Schauer, 1998, #1650	wood
Schauer & al., 2001 #4375	wood in fireplace							4.12							0.702	1.12	0.428		0.429	0.169	0.091	0.04	0.066	0.035	0.117	0.026		0.086		0.005	0.028	0.0056		0.041	0.0078											0.383	0.158	0.078	0.023
Sheesley & al., 2003 #4557	coconut leaves
Sheesley & al., 2003 #4557	rice straw
Sheesley & al., 2003 #4557	jackfruit branches
Shen &al, 2010; #11223	China, crop residues	1380	120	126	47	0.874539
Shen &al, 2011; #11221	China, crop residues
Shen & al 2012 #9978	China, 18 biofuels			51.8966		0.95	52.6316
Shen & al 2012 #11213	China, 27 wood fuels
Shen &al, 2013; #11208	China, wood, crop res.
Shen & al 2014, #9979	China, crop residue			92.7
Shen & al 2014, #9979	China, fuel wood log			52.9
Shen & al 2014, #9979	China, brushwood/branch			62.8
Shen & al 2015, #9980	China, firewood, cookstoves	1445		90.2		0.910681
Smith , 1988 #3420	tropical wood			80.9							7.6
Smith & al., 1993 #3424	wood burning, Indonesia	1590		100		0.910068	98.832	8.5			12.5
Smith &al, 2000; #3962	India, wood, trad. Stove	1395		66.5		0.930319		3.93
Stockwell & al 2015 #10072	lab, adjusted to field, open cooking							4.86							0.6	2.21			0.317		0.245				0.034									0.145											0.197	2.85	0.29
Stockwell & al, 2016 #10812	Nepal, hardwood	1462		77.2		0.923389		5.16							0.764	2.7	0.16	0.064	0.567	0.202	0.726	0.846	0.068	0.055	0.204	1.11	0.406	0.014	0.02	0.022	0.0074	0.086		0.042							0.0185	0.032	0.01		0.047	1.05	0.241	0.14	0.042
Sun & al 2017, #9956	China, kang stove, maize straw
Sun & al 2018, #10320	China, various fuels
Tang &al, 2014; #10376	China, crop residues,stove			81.9
Tian &al, 2017; #10346	China, crop residues,stove
Tsai & al., 2003 #4592	biofuel in stoves, China														0.6	0.44	0.028																													0.34	0.021
Venkataraman & Rao, 2001 #5620	biofuel, India			105
Venkataraman & al, 2005, #4990	fuel wood, low burn rate
Venkataraman & al, 2005, #4990	fuel wood, high burn rate
Venkataraman & al, 2005, #4990	crop waste
Vicente & Alves 2018; #10404	fireplaces
Vicente & Alves 2018; #10404	woodstoves
Wang &al, 2008; #11228	China, cookstoves, wood
Wang & al 2009, #9390	cookstove, wood & crop res.	1114		139		0.836085		5.1			7.5							0.29	0.88		0.059	0.134			0.18								0.039	0.0168		0.059			0.028					0.028		1.44	0.74	0.13	0.125
Wang & al 2009, #9390	kang stove, wood & crop res.	1553		47.1		0.954515		1.3			1								0.086			0.03																								0.11	0.027
Wang & al 2014; #10444	China crop residues			53.7							4.87						0.32629		0.23863																											0.42369
Wathore &al, 2017; #10372	Malawi woodstoves			70
Wei &al, 2014; #10380	crop straw, China
Weyant &al, 2019; #11298	chulha, S. Asia			98.8
Weyant &al, 2019; #11298	wood, Tibet			121.4
Weyant &al, 2019; #11298	Uganda, 3-stone			67.2
Zhang & Smith, 1996 #1883	wood	1649		100.3		0.912767		9.1			8.5				0.897632	2.56444	1.83537			0.798096	0.521389	0.454113			0.35467	0.127177	0.0468202			0.0670436		0.0770461					0.0154515									2.72182	1.58809		0.28284
Zhang & Smith, 1999 #3421	crop residue
Zhang & Smith, 1999 #3421	wood
Zhang & al., 1999 #3302	crop residue, India & China			77
Zhang & al., 1999 #3302	root fuel India & China			56
Zhang & al., 1999 #3302	wood India & China			78
Zhang & al., 2000, #3635 & Tsai & al 2003 #4592	wood, China	1520		69.2		0.933243		5.06			5.425				0.69	0.43	0.016																													0.45
Zhang & al., 2000, #3635	crop residue, China	1376		86.3		0.910296		6.16			4.9875				0.54	0.44	0.035																													0.27
Zhang & al, 2013 #8865	various fuels, China
Non-dung average		1549.48	-	82.5744		0.923423		6.81189	0.128324		7.84281				0.675045	1.32874	0.629501	0.130667	0.401818	0.243014	0.22871	0.256519	0.0513333	0.035	0.146741	0.188168	0.152473	0.0256	0.0175	0.0179305	0.0137	0.0446615	0.0168	0.0578527	0.0078	0.0605	0.0154515	-	0.0182	-	0.00871667	0.0651333	0.00548333	0.0074	0.100271	0.952658	0.44563	0.131624	0.097647
Std.Dev.		171.929		29.186		0.0301465		6.03843			5.04805				0.371145	0.896744	0.610145	0.138598	0.287577	0.247624	0.236512	0.331302	0.0271539	0.02	0.0990342	0.408666	0.220573	0.0297926	0.02-0.02	0.020585	0.0124133	0.0427584	0.0149408	0.0487812	-	0.0473885	-	-	0.00668581	-	0.00575514	0.0843318	0.00317516	0.0137375	0.144249	0.890391	0.510042	0.146612	0.102351
N		36		61		39		28			23				14	15	13	3	13	7	9	6	3	3	9	7	3	6	2	8	3	4	4	10	1	4	1	0	5	0	6	3	6	4	7	17	14	10	7
Bertrand &al, 2017; #10339	autom pellet stove	1637						0.133			5.1
Dung
Ahuja, 1993, cited in Piccot #2528	dung cakes							6.2
Christian & al., 2007 #6108	cow dung in field	832		104		0.835839		11								1.12			1.89
Fleming & al, 2018a #10606	cow dung in cookstove
Fleming & al, 2018b #11017	cow dung in chulha cookstove	984		97.7		0.865048		6.9							1.13	1.86	0.717	0.094	0.81	0.21	0.158	0.133	0.044	0.034	0.21	0.047	0.017	0.042	0.027	0.02	0.015	0.052	0.02	0.089					0.061		0.01	0.01			0.0031	1.03	0.483	0.087	0.034
Fleming & al, 2018b #11017	cow dung in angithi cookstove	888		125		0.818884		15.1							0.325	1.77	2.06	0.052	1.61	0.82	0.366	0.353	0.151	0.107	0.27	0.215	0.073	0.122	0.076	0.068	0.038	0.169	0.057	0.188					0.167		0.049	0.031			0.0052	0.77	0.86	0.228	0.098
Gadi &al, 2003; #11245	dung cakes, India
Habib & al., 2004 #4617	dung cakes
Habib & al., 2008 #5504	cow dung
Jayarathne & al, 2018, #10811	Nepal, dung
Joshi, 1991; #515	dung cakes			38				3			10
Ludwig & al, 2003, #3161	Zimb., dung	1608.69		83.96		0.924211	82
Marufu &al, 1999; #2476	Zimb., dung, recalc. Yevich	1103		58		0.923684
Keene & al., 2006	cow dung	899		106		0.843696
Pandey & al 2017 #10414	dung
Saud & al., 2011 #7439	dung cake
Sheesley & al., 2003 #4557	cowdung
Stockwell & al, 2016 #10812	Nepal. dung	1129		80.9		0.898805		6.65							0.593	4.23	1.075	0.172	1.47	0.457	0.399	0.281	0.151	0.102	0.409	0.29	0.215	0.168	0.166	0.19	0.056	0.811		0.325							0.291	0.5	0.114		0.348	1.96	1.26	0.63	0.366
Zhang & al., 1999 #3302	dung cakes, India			43
Smith , 1988 #3420	Hawaiian cow dung			83
Smith &al, 2000; #3962	India, dung, trad. stove	1010		60		0.914629		17
Smith & al., 2000 #4003	India	1027		49.6		0.929468		5.7			18.8
Venkataraman & Rao, 2001 #5620	dung cake			198
Venkataraman & al, 2005, #4990	cow manure
Weyant &al, 2019; #11298	Tibet, dung			118.9
Dung burning average		1053.41		89.0043		0.883807		8.94375			14.4				0.682667	2.245	1.284	0.106	1.445	0.495667	0.307667	0.255667	0.115333	0.081	0.296333	0.184	0.101667	0.110667	0.0896667	0.0926667	0.0363333	0.344	0.0385	0.200667	-	-	-	-	0.114	-	0.116667	0.180333	0.114	-	0.118767	1.25333	0.867667	0.315	0.166
Std.Dev.		230.254		41.9332		0.0432425		4.92584			10.0-18.8				0.409922	1.36378	0.695466	0.0608933	0.45793	0.306833	0.130661	0.112167	0.0617765	0.0407799	0.10208	0.124431	0.102065	0.06376	0.0705006	0.0876432	0.0205508	0.408643	0.02-0.06	0.118509	-	-	-	-	0.06-0.17	-	0.152231	0.277039	-	-	0.198525	0.625646	0.388557	0.281761	0.176136
N		9		14		9		8			2				3	4	3	3	4	3	3	3	3	3	3	3	3	3	3	3	3	3	2	3	0	0	0	0	2	0	3	3	1	0	3	3	3	3	3
Agricultural Residues in Fields								0.516285		1	0.0396223	1
Andreae, 1996, #1609	Sugar Cane, S. Africa			29.7517		0.968054	33
Andreae & al, 1998, #1389	Sugar Cane, S. Africa
Blake & al, 1996, #1542	pasture clearing, Brazil			33.358		0.96432	37	1.65211		3.2					0.0921973	0.0171542	0.271004	0.00992856	0.0189622	0.073812						0.0125339	0.00318024			0.00348347																0.108109	0.056349
Christian & al., 2010 #6887	stubble burn, Mexico			118				5.95			16.85				0.25	2			0.77
deZarate & al., 2000, #3645	Cereal Waste	1400		35		0.962204
Dhammapala, 2007 #6460	Wheat, Grass (scaled by aircraft data)			53.1
Fang & al, 2017; #10434	rice	1262		63.5		0.926733					5.04				0.96	1.32	0.49		0.32	0.17	0.045		0.016	0.013	0.03	0.062	0.052	0.017	0.02	0.016	0.037	0.036		0.096	0.005		0.003		0.007		0.12	0.018	0.047		0.019	0.567	0.206	0.061	0.027
Fang & al, 2017; #10434	corn	1477		46.1		0.953252					2.47				0.15	0.54	0.45		0.34	0.13	0.027		0.035	0.025	0.116	0.034	0.011	0.029	0.019	0.011	0.026	0.015		0.026	0.008		0.002		0.016		0.001	0.01	0.004			0.163	0.142	0.028	0.016
Fang & al, 2017; #10434	wheat	1423		48.6		0.949071					3.08				0.29	0.78	0.59		0.33	0.1	0.044		0.04	0.03	0.104	0.078	0.004	0.021	0.023	0.006	0.036	0.031		0.06	0.008		0.001				0.001	0.001	0.003			0.249	0.134	0.038	0.012
Friedli & al, 2003 # 4532	ag. waste, Oregon
Hayashi & al 2014, #9982	crop residues, Japan	905		74		0.886151		4.1
Hays & al 2005, #5248	wheat residue
Hays & al 2005, #5248	rice straw
Holder & al 2017 #10337	Kentucky blue grass	1550		52		0.949927		1.4			2								0.24						0.079																					0.14	0.118	0.022
Holder & al 2017 #10337	wheat residue	1500		44		0.955941		0.96			1.1								0.13						0.034																					0.06	0.08	0.01
Huang &al, 2011; #11216	China, crop residue
Jayarathne & al, 2018, #10811	Nepal, agric. fire, wheat, rice
Kim Oanh & al 2015, #9577	rice straw	1177		93		0.889561																																								0.763	0.232
Kim Oanh & al 2011, #10270	rice straw	1147		97		0.882709
Kituyi & al, 1999,#3172	Kenya, crop	1425.47		67.4012		0.930845	74
Koppmann & al., #1681	Sugar Cane																											0.00722335			0.00586897						0.0154276		0.0123802					0.00333332		0.137441	0.0254697	0.00946085	0.0297341
Kudo & al 2014, #9751	wheat residue	1698		44.1		0.960793		7.1								1.16	0.645		0.765	0.235																										0.31	0.24
Li & al 2007; #10447	wheat straw, China	1470		60		0.939733		3.4			7.5
Li & al 2007; #10447	corn stover, China	1350		53		0.941899		4.4			10
Li & al, 2009 #6935	Maize, Rice straw										1.64			speciated NMHC					0.155	0.135	0.065	0.038	0.026	0.02	0.003	0.002	0.005	0.002	0.03	0.09	0.026	0.007		0.052							0.005	0.24	0.07		0.005	0.25	0.135	0.072	0.021
Liousse & al, 1996, #2464	Misc
Liu & al, 2016 #9853	mostly rice straw	1339		64.5		0.929639																																								0.139	0.091
Lobert & al. 1991 #418	straw							2.7
Ludwig & al, 2003, #3161	Zimb., maize	1718.63		62.97		0.945565	58
Nguyen & al, 1994, #1511	Rice straw,Viet Nam, dry season			117.204		0.884956	130
Nguyen & al, 1994, #1511	Rice straw,Viet Nam, wet season			252.439		0.78125	280
Nguyen & al, 1995, #838	rice straw			50.2173		0.947239	55.7
Ni & al 2015, #9981	crop residues, China	1351		52		0.942972
Obrist &al, 2007; #11239	rice straw
Rasmussen & al, 1980, #231	corn stalks, straw
Saarnak & al., 2003 #6753	mixed, Ghana	1403		94		0.904756
Sahai & al, 2007 #6265	wheat straw, India	1787		28		0.975972		3.55
Smith & al., 2000 #4003	mustard, rice	1202		57.15		0.930488		6.5			11.1875
Stockwell & al 2015 #10072	lab, adjusted to field, crop res.							3.49							0.33	1.34		0.34	0.576		0.134				0.191									0.22											0.064	0.3	0.296
Stockwell & al, 2016 #10812	Nepal, crop residue	1401		72.3		0.924997		2.79							0.216	0.89	0.566		0.492	0.186	0.119				0.814									0.02												0.379	0.224	0.297	0.062
Tang 7al, 2014; #10376	China, crop residues			28.7
Wang & al 2014; #10444	China crop residues			24.2							2.55					0.3723	0.1326		0.13005																											0.1224	0.06885
Whitburn &al, 207; #10342	tropical croplands
Yokelson & al, 2008 #6308	Pasture maint.	1506		152.4		0.862812		10.26							0.2	1.14	1.8		0.84															0.75												0.53	0.39	0.26	0.15
Yokelson & al, 2009 #6574	Crop residue	1676		75		0.934308		4.24							0.202	0.842	0.676		0.517	0.194	0.097	0.082	0.041	0.031	0.101	0.042	0.014			0.014		0.007				0.001
Yokelson & al, 2011 #7338	crop residues, Mexico	1664		85.6		0.925217		5							0.233	1.16	0.91		0.496	0.282	0.134	0.117	0.057	0.043	0.151	0.072	0.025			0.151
Yonemura & Kawashima 2007	rice hulls	847		224		0.706449		25.7
Zarzana & al 2017 #10818	SE US ag fires
Zhang & al, 2015; #9612	wheat, rice, rapeseed, China	1735		63		0.946026
Zhuang & al, 1996, #2466	Misc
Agricultural Residues Average		1416.56		73.988		0.920128		5.48189		3.2	5.76523	-	-	-	0.29232	0.963455	0.65306	0.174964	0.408001	0.167312	0.083125	0.079	0.0358333	0.027	0.1623	0.0432191	0.0163115	0.0152447	0.023	0.0416405	0.0261738	0.0192	-	0.174857	0.007	0.001	0.0053569	-	0.0117934	-	0.03175	0.06725	0.031	0.00333332	0.0293333	0.281197	0.162578	0.0886068	0.0453906
Std.Dev.		239.664		50.4802		0.0563643		5.69609		-	5.05082	-	-	-	0.24389	0.516089	0.456837	0.01-0.34	0.255874	0.0656821	0.0432912	0.0395854	0.0140202	0.0102956	0.235995	0.0292057	0.0174865	0.010784	0.00496655	0.0568399	0.0125111	0.013572	-	0.262511	0.00173205	-	0.00676327	-	0.0045286	-	0.0588635	0.115376	0.033116	-	0.0308275	0.201313	0.100283	0.110088	0.0489489
N		25		34		30		17		1	11	0	0	0	10	12	10	2	15	9	8	3	6	6	10	7	7	5	4	7	5	5	0	7	3	1	4	0	3	0	4	4	4	1	3	15	15	9	7
Garbage burning
Christian & al., 2010 #6887	Mexico	1367		45.3		0.950509		3.7			8.2				0.4	2.19			1.26
Stockwell & al, 2016 #10812	Nepal	1602		84.7		0.923299		3.97							0.662	3.03	1.69	0.09	1.73	0.904	1.05	0.625	0.172	0.144	0.267	0.513	0.122	0.731	0.3	1.08	0.0412	0.391		0.067							0.282	0.28	0.231		0.092	2.61	0.817	0.57	0.498
Jayarathne & al, 2018, #10811	Nepal, garbage
Garbage Average		1484.5		65		0.936904		3.835		-	8.2	-	-	-	0.531	2.61	1.69	0.09	1.495	0.904	1.05	0.625	0.172	0.144	0.267	0.513	0.122	0.731	0.3	1.08	0.0412	0.391	-	0.067	-	-	-	-	-	-	0.282	0.28	0.231	-	0.092	2.61	0.817	0.57	0.498
Std.Dev.		166.17		27.86		0.0192406		0.190919		-	-	-	-	-	0.40-0.66	2.2-3.0	-	-	1.3-1.7	-	-	-	-	-	-	-	-	-	-	-	-	-	-	-	-	-	-	-	-	-	-	-	-	-	-	-	-	-	-
N		2		2		2		2		0	1	0	0	0	2	2	1	1	2	1	1	1	1	1	1	1	1	1	1	1	1	1	0	1	0	0	0	0	0	0	1	1	1	0	1	1	1	1	1
Peat fires
Jayarathne & al, 2018 #10620	Kalimantan
Stockwell & al, 2016 #9835	Kalimantan	1564		291		0.773788		9.5							0.121	0.961	1.52	0.0056	1.07	0.99	0.182	0.311	0.078	0.062	0.189	0.321	0.09	0.11	0.062	0.243	0.125	0.123		0.053	0.025	0.01		0.109			0.143	0.054	0.112	0.065	0.005	0.954	0.37	0.225	0.042
Stockwell & al 2015 #10072	lab, adjusted to field, peat	1325		256		0.767123		10.5							0.153	1.16			1.21		0.744				0.26									0.983											0.159	0.78	0.52
Hamada & al, 2013 #8803	peatland, Kalimantan						382			26.1
Hamada & al, 2013 #8803	literature average						290			33
Huijnen & al, 2017 #	Kalimantan	1625		234		0.81549		7.8
Nara &al, 2017; #10338	Sumatra	1663		235		0.81831		7.6
Smith & al, 2018, #10599	tropical peatland, Malaysia	1579		251		0.800151		11							0.06	2.3	2.17
Average		1551.2		253.4		0.794972		9.28		29.55	-	-	-	-	0.111333	1.47367	1.845	0.0056	1.14	0.99	0.463	0.311	0.078	0.062	0.2245	0.321	0.09	0.11	0.062	0.243	0.125	0.123	-	0.518	0.025	0.01	-	0.109	-	-	0.143	0.054	0.112	0.065	0.082	0.867	0.445	0.225	0.042
Std.Dev.		132.334		23.1366		0.0235416		1.54175		26.10-33.00	-	-	-	-	0.0472476	0.72251	1.5-2.2	-	1.07-1.21	-	0.18-0.74	-	-	-	0.19-0.26	-	-	-	-	-	-	-	-	0.05-0.98	-	-	-	-	-	-	-	-	-	-	0.005-0.16	0.78-0.95	0.37-0.52	-	-
N		5		5		5		5		2	0	0	0	0	3	3	2	1	2	1	2	1	1	1	2	1	1	1	1	1	1	1	0	2	1	1	0	1	0	0	1	1	1	1	2	2	2	1	1
Lab Experiments								0.510417		1	0.0483188	1
Bertschi & al., 2003 #4398	Residual smoldering	1494	62	145.9	61.9	0.866971		9.3	63.7423						0.16	1.38	2.83
Bingemer, unpubl.	grasses and wood
Burling & al., 2010 #7122	chaparral fuels	1772		66		0.944714		1.44	21.8182						0.194	0.462			0.141
Burling & al., 2010 #7122	oak woodland	1736		41.9		0.963463		1.13	26.969						0.067	0.293			0.097
Burling & al., 2010 #7122	SE forest understory fuel	1828		67.5		0.945163		2.26	33.4815						0.197	0.837			0.288
Burling & al., 2010 #7122	Black spruce duff	1219		162		0.82726		9.6	59.2593						0.112	1.73			1.4
Cao & al 2008; #10446	ag waste, China	1681		74.8		0.934653
Chen & al 2007 #9396	various fuels	1658		31.9		0.970657
Christian &al, 2003; #4703	Indon. Peat	170		210		0.340029		20.8							0.13	2.57			3.38															1.38												3.19	1.55
Christian & al., 2007 #6108	RSC, residual smoldering	1343		229		0.788696		17.1	74.6725						0.07	1.42			1.43
Cofer & al, 1991, #408	various fuels
Ciccioli & al, 2001; #3872	pine wood, wheat straw																											0.011	0.014	0.0099	0.013	0.0036	0.024	0.0093	0.0056	0.012			0.026	0.065	0.0066			0.018	1.4	0.154	0.142	0.076	0.026
Cui &al, #10318	SE Asia rainforest fuels
Ezcurra &al, 1996; #11281	cereal waste, Spain	1400.67
Franca &al, 2012; #11215	sugar cane, Brazil	1303	218	65	14	0.927317
Friedli & al, 2001 #4209	forest debris
Gadi &al, 2003; #11245	various biofuels
Geron & Hays 2013, #7817	organic soils, peat, RSC	1180		233		0.763213					30.2
Goode & al., 1999, #3314	needles. litter, grass	1723		39		0.965657		1.78	45.641						0.12	0.71						0.41
Griffith & al, 1991, #489	sagebr. slash			155.981		0.851064	175	6.73751	43.1944	13.2
Hall &al, 2012; #11214	sugarcane, whole stalk	1255		9.2		0.988613																																								0.0165	0.0052	0.0012	0.0008
Hartmann, 1990, #11269	various fuels
Hatch & al, 2015, #9328	this paper contains a huge data set on VOC (708 compounds)										6.7			VOC&OVOC														0.038	0.104	0.107	0.07	0.141	0.017	0.187	0.03	0.076	0.0078	0.019	0.113	0.028	0.067	0.021	0.065	0.088	1.31	0.43	0.34	0.18	0.055
Hays & al 2002, #5248	foliar fuels														0.072	0.63	0.26		0.38	0.108	0.086		0.033	0.024	0.076	0.045	0.013	0.033	0.027	0.024	0.094			0.107	0.017		0.002		0.058		0.014	0.07	0.014	0.026	0.049	0.194	0.191	0.091	0.031
Hays & al 2005, #5248	wheat residue
Hays & al 2005, #5248	rice straw
Holzinger & al, 1999, #3197	various fuels			44.566		0.952381	50
Holzinger, 1998, #3219	various fuels																																			0.034										0.13	0.074	0.063
Hosseini &al, 2013; #10384	SW US chaparral
Hosseini &al, 2013; #10384	SW US woodlands
Hosseini &al, 2013; #10384	SE US woodlands
Inomata & al 2015, #9462	wheat straw																																													0.483333	0.21
Inomata & al 2015, #9462	Rape plant																																													0.26	0.16
Irfan &al, 2014; #10377	crop residues, Pakistan	876		13.1		0.977043
Jenkins & al, 1996, #3325	cereal straws
Jenkins & al, 1996, #3325	forest residues
Jost, 2002; Thesis	various fuels
Keene & al, 2006 #5377	grass	1626		53.1		0.951193
Keene & al, 2006 #5377	shrub	1641		86.2		0.923758
Keene & al, 2006 #5377	branches	1664		62.9		0.943937
Keene & al, 2006 #5377	litter	1532		106		0.901946
Keene & al, 2006 #5377	ag. waste	1524		38.1		0.962204
Keshtkar & Ashbaugh, 2007; #11240	almond pruning, rice straw
Koss & al 2018; #10634	various fuels														0.36	0.54			0.55						0.28									0.21	0.03										1.1	0.37	0.24
Kuhlbusch & al, 1991, #422	various fuels
Li & al 2017; #10443	China ag. residues
Lobert & al., 1991, #418	various fuels	1380		64.1073		0.931975	73	3.7544	58.5643		8.7266			C2-C8		0.775698	0.467067		0.471188	0.15111			0.0398381	0.0256429	0.135999	0.0398381				0.0495229				0.0779819												0.375508	0.247546	0.121541
Manoe, 1995, #1381	various	1305.94		60.7117		0.931928																																								0.761573	0.82926
Manoe, Andreae, 1994, #793	various fuels
McKenzie & al., 1995 #2325	wood, needles, bark, litter, duff							1.4984	29							1.08427	0.242158
McMeeking & al, 2009 #9935	FLAME, grand average	1489	114	85.8	10	0.916979	57.6226	2.7	31.7778	1.8133	7.7				0.35	2.43	0.64		1.2	0.29
Medeiros & al, 2008 #6800	green forest biomass
Miura &al, 1996; #10348	rice straw, Japan	911		58		0.909063		3.12
Mugica-Alvarez &al, 2018, #10319	sugar cane, Mexico	1618		25.7		0.975651		2.29			7.97			sum meas.		1.9	0.95		0.26	0.72	0.14		0.03	0.03		0.35	0.19	0.01	0.17	0.15		0.18		0.19					0.06		0.05	0.25	0.26			0.29	0.3	0.25	0.46
Munchak & al, 2010 #7192	US vegetation fuels
Ni &al, 2017; #10340	China, various crop residues
Nguyen & al, 1995, #838	Afr. savanna plants
Oros &al, 2001; #11246	temperate conifers
Oros &al, 2001; #11247	deciduous trees
Oros &al, 2006; #11241	grasses
Pallozzi &al, 2018; #11273	Medit. tree species	1229		137		0.850956		0.56																										2.25												5.72	2.4
Parashar &al, 2005; #11242	ag residues
Pham-Van-Dinh, 1996 #3203	grass, straw
Rasmussen & al, 1980, #231	various fuels
Rasmussen & al, 1980, #231	various fuels
Reinhardt & Ward 1995, #3339	Fir sticks, fl. Phase
Reinhardt & Ward 1995, #3339	Fir sticks, sm.ph. Phase
Reinhardt & Ward 1995, #3339	Duff, flam.phase
Reinhardt & Ward 1995, #3339	Duff, smold.phase
Arai &al, 2015; #10361	rice straw	1078		128		0.842769		13.4			4.7
Romasanta &al, 2017; #10347	rice straw, Philippines							4.51
Samburova &al, 2016; #10357	various fuels
Sanchis &al, 2014; #10366	rice straw	692
Santiago &al, 2017; #10341	Mexico, various crops	1168		90		0.892005
Santiago &al, 2018; #10336	Mexico, various crops	1591		67.6		0.937418		2.88
Selimovic & al 2018, #10630	W US wildfire fuels	1647		78.2		0.930577		3.31							0.45	1.63			0.61						0.17
Selimovic & al 2018, #10630	peat					0.829876	205	10.39
Selimovic & al 2018, #10630	dung					0.90009	111	6.63
Selimovic & al 2018, #10630	rice straw
Sheesley & al., 2003 #4557	Bangladesh biofuels
Sheesley & al., 2003 #4557	Bangladesh cowdung
Sillapapiromsuk &al, 2013; #10382	ag waste, Thailand			49.2
Sirithian &al, 2018; #10383	Thailand, maize residue					0.9996	0.400				0.128											0.002																			0.0017					0.0065
Soares Neto & al, 2011 #10704	Amazon forest trees	1565		50.3		0.951928	50.5066				14.2
Stockwell & al 2015 #10072	lab, adjusted to field, sav. grass							2.27							0.25	1.14			0.347		0.106				0.141									0.154											0.031	0.253	0.174
Stockwell & al 2015 #10072	lab, adjusted to field, crop res.							3.49							0.33	1.34		0.34	0.576		0.134				0.191									0.22											0.064	0.3	0.296
Stockwell & al 2015 #10072	lab, adjusted to field, peat	1325		256		0.767123		10.5							0.153	1.16			1.21		0.744				0.26									0.983											0.159	0.78	0.52
Stockwell & al 2015 #10072	lab, adjusted to field, chap.	1656		82.7		0.927243		3.1							1.16	2.52		0.344	0.571		0.167				0.205									0.536											0.076	0.795	0.416
Stockwell & al 2015 #10072	lab, adjusted to field, coniferous canopy	1656		74.2		0.934229		3.69							0.89	3.2		0.716	0.956		0.346				0.33									1.03											0.163	0.946	2.42
Stockwell & al 2015 #10072	lab, adjusted to field, open cooking							4.86							0.6	2.21			0.317		0.245				0.034									0.145											0.197	2.85	0.29
Tawfiq &al, 2015; #10362	various trop. Fuels			112																																										0.207	0.11
Turn & al, 1997, #1963	herbaceous fuels
Turn & al, 1997, #1963	wood fuels
Ward & al, 1982, #492	forest fuels
Wiriya &al, 2016; #10351	Thai ag waste, leaf litter
Yokelson & al, 1999, #1671	various fuels							3.32231	64.3							1.34631
Yokelson & al, 1997, #2339	hardwood, grass, duff, leaves							3.38431	65.5						0.142598	0.885491	0.435884		0.881078
Yokelson & al, 1996, #2642	pine needles, sage brush							5.63191	109						0.822038	1.54509	1.37546
Yokelson & al. 2008 #6308	Tropical fuels	1677		57.5		0.948881		3.82	66.4348						0.33	1.83			0.56															0.46												0.65	0.56	0.34	0.18
Zarzana & al, 2018 #11142	33 N Am fuels
Zhang & al, 2008; #10445	China ag waste	1203.6		106.7		0.87774
Lab Average		1400.47		90.2273		0.898649	103.161	5.62329	52.8903	7.50665	11.4567	-	-	-	0.331411	1.42275	0.900071	0.466667	0.781263	0.317277	0.246	0.41	0.0342794	0.0265476	0.1823	0.144946	0.1015	0.023	0.07875	0.0680846	0.059	0.1082	0.0205	0.406377	0.02065	0.0406667	0.0049	0.019	0.06425	0.0465	0.0344	0.113667	0.113	0.044	0.4549	0.671796	0.45375	0.140343	0.125467
Std.Dev.		340.574		60.8152		0.107942	63.4764	4.78855	23.0884	1.813-13.200	8.76394	-	-	-	0.300504	0.744497	0.867365	0.215938	0.733749	0.279487	0.218183	-	0.00504228	0.00310063	0.0914587	0.177601	0.013-0.19	0.0145831	0.0726516	0.0589448	0.0416053	0.0926613	0.017-0.024	0.424664	0.0117568	0.0325167	0.002-0.008	-	0.0360405	0.028-0.065	0.0288393	0.120583	0.129835	0.0383145	0.569664	0.84398	0.573827	0.110668	0.17562
N		37		39		40	7	30	15	2	7	0	0	0	21	25	8	3	20	4	8	1	3	3	10	3	2	4	4	5	3	3	2	14	4	3	2	1	4	2	4	3	3	3	10	20	20	8	6
[truncated: 118 more columns]

## Sheet: Table 1
Column1	Column2	Column3	Column4	Column5	Column6	Column7	Column8	Column9	Column10	Column11	Column12	Column13	Column14	Column15	Column16	Column17	Column18	Column19	Column20	Column21	Column22	Column23	Column24	Column25	Column26	Column27	Column28	Column29	Column30	Column31	Column32	Column33	Column34	Column35	Column36	Column37	Column38	Column39	Column40	Column41	Column42	Column43	Column44	Column45	Column46	Column47	Column48	Column49	Column50
Table 1: Emission factors for pyrogenic species emitted from various types of biomass burning																			Table 1 (continued)
Species		Savanna and grassland			Tropical forest			Temperate forest			Boreal forest			Peat Fires			Agricultural residues (open)		Species		Biofuels (without dung)			Dung			Charcoal making			Charcoal burning			Garbage burning			Lab studies		EMb
	average	std.dev.	N	average	std.dev.	N	average	std.dev.	N	average	std.dev.	N	average	std.dev.	N	average	std.dev.	N		average	std.dev.	N	average	std.dev.	N	average	std.dev.	N	average	std.dev.	N	average	std.dev.	N	average	std.dev.	N
MCE	0.938305	0.0184274	48	0.905223	0.033914	15	0.897751	0.04737	45	0.889916	0.0426728	21	0.794972	0.0235416	5	0.920128	0.0563643	30	MCE	0.923423	0.0301465	39	0.883807	0.0432425	9	0.793685	0.0358106	8	0.87786	0.0407933	15	0.936904	0.0192406	2	0.898649	0.107942	40	---
CO2	1660	90	31	1620	70	9	1570	130	39	1530	140	14	1550	130	5	1420	240	25	CO2	1550	170	36	1050	230	9	490	70	7	2500	350	14	1480	170	2	1550	340	37	---
CO	69.4512	20.5788	49	104.786	39.8089	15	113.247	50.4145	46	121.35	46.5714	22	250	23.1366	5	73.988	50.4802	34	CO	82.5744	29.186	61	89.0043	41.9332	14	93.3438	38.5811	9	207.43	62.695	17	65	27.86	2	90.2273	60.8152	39	---
CH4	2.45357	1.0132	47	6.15829	2.01695	13	5.20441	2.82315	36	5.5407	2.51418	20	9.28	1.54175	5	5.48189	5.69609	17	CH4	6.81189	6.03843	28	8.94375	4.92584	8	19.0063	19.8657	8	5.99889	2.64678	9	3.835	0.190919	2	5.62329	4.78855	30	---
Total non-methane hydrocarbons	3.52731	1.2151	13	5.60781	1.50064	4	13.4124	11.7508	13	6.04253	2.93911	8	18.5598	-	0	5.76523	5.05082	11	Total NMHC	7.84281	5.04805	23	14.4	10.0-18.8	2	26.4353	18.1364	4	6.5842	4.91175	6	8.2	-	1	11.4567	8.76394	7	CO
C2H2	0.320903	0.294883	28	0.353476	0.390608	6	0.312428	0.0942601	20	0.28256	0.134526	12	0.111333	0.0472476	3	0.29232	0.24389	10	C2H2	0.675045	0.371145	14	0.682667	0.409922	3	0.279681	0.239939	3	0.270344	0.179771	4	0.531	0.40-0.66	2	0.331411	0.300504	21	---
C2H4	0.851474	0.378453	25	1.10615	0.24322	5	1.11711	0.298738	20	1.53943	0.662908	7	1.47367	0.72251	3	0.963455	0.516089	12	C2H4	1.32874	0.896744	15	2.245	1.36378	4	1.50978	0.778904	4	0.486642	0.352725	6	2.61	2.2-3.0	2	1.42275	0.744497	25	---
C2H6	0.410671	0.320506	28	0.882239	0.23498	7	0.685333	0.57279	20	0.970566	0.369466	14	1.845	1.5-2.2	2	0.65306	0.456837	10	C2H6	0.629501	0.610145	13	1.284	0.695466	3	2.36088	1.3-3.4	2	0.744987	0.369143	5	1.69	-	1	0.900071	0.867365	8	---
C3H4	0.0714036	0.111116	8	0.0129794	-	1	0.0490331	0.0176061	7	0.0615036	0.0309041	3	0.0056	-	1	0.174964	0.01-0.34	2	C3H4	0.130667	0.138598	3	0.106	0.0608933	3	0.0939499	-	0	0.208776	-	0	0.09	-	1	0.466667	0.215938	3	CO
C3H6	0.462518	0.446609	26	0.862581	0.410086	5	0.625326	0.396328	19	0.673685	0.451711	7	1.14	1.07-1.21	2	0.408001	0.255874	15	C3H6	0.401818	0.287577	13	1.445	0.45793	4	1.03117	0.322374	4	0.53173	0.188112	3	1.495	1.3-1.7	2	0.781263	0.733749	20	---
C3H8	0.134003	0.184896	20	0.533961	0.15-0.91	2	0.274326	0.186986	14	0.294951	0.10036	8	0.99	-	1	0.167312	0.0656821	9	C3H8	0.243014	0.247624	7	0.495667	0.306833	3	0.528707	-	1	0.17346	0.119786	3	0.904	-	1	0.317277	0.279487	4	---
1-Butene	0.0821458	0.0491936	13	0.0725872	0.020-0.125	2	0.122318	0.0610518	9	0.158784	0.143054	4	0.463	0.18-0.74	2	0.083125	0.0432912	8	1-Butene	0.22871	0.236512	9	0.307667	0.130661	3	-	-	0	0.118564	0.040-0.20	2	1.05	-	1	0.246	0.218183	8	CO
i-Butene	0.0405968	0.0192876	6	0.109267	-	1	0.0857032	0.0735703	9	0.0518287	0.0319593	3	0.311	-	1	0.079	0.0395854	3	i-Butene	0.256519	0.331302	6	0.255667	0.112167	3	-	-	0	0.0909562	0.026-0.16	2	0.625	-	1	0.41	-	1	CO
trans-2-Butene	0.0201425	0.0120818	11	0.0328076	0.016-0.050	2	0.0372012	0.0306891	9	0.0297198	0.0184957	3	0.078	-	1	0.0358333	0.0140202	6	trans-2-Butene	0.0513333	0.0271539	3	0.115333	0.0617765	3	-	-	0	0.0397659	0.016-0.063	2	0.172	-	1	0.0342794	0.00504228	3	CO
cis-2-Butene	0.0167385	0.0104076	11	0.0309255	0.020-0.042	2	0.0375742	0.0394326	9	0.0230009	0.0159118	3	0.062	-	1	0.027	0.0102956	6	cis-2-Butene	0.035	0.02	3	0.081	0.0407799	3	-	-	0	0.0253996	0.016-0.034	2	0.144	-	1	0.0265476	0.00310063	3	CO
Butadiene	0.0948657	0.0572942	13	0.150407	-	0	0.125437	0.0676608	12	0.0889007	0.0304825	4	0.2245	0.19-0.26	2	0.1623	0.235995	10	Butadiene	0.146741	0.0990342	9	0.296333	0.10208	3	-	-	0	0.112531	0.0855579	3	0.267	-	1	0.1823	0.0914587	10	CO
n-Butane	0.020792	0.0106659	14	0.0409964	-	1	0.081495	0.0600268	11	0.110844	0.0591658	7	0.321	-	1	0.0432191	0.0292057	7	n-Butane	0.188168	0.408666	7	0.184	0.124431	3	-	-	0	0.0738829	0.053-0.095	2	0.513	-	1	0.144946	0.177601	3	CO
i-Butane	0.00738518	0.0050052	13	0.0145155	-	1	0.0305014	0.0259011	11	0.0519434	0.0510974	6	0.09	-	1	0.0163115	0.0174865	7	i-Butane	0.152473	0.220573	3	0.101667	0.102065	3	-	-	0	0.0116655	0.010-0.013	2	0.122	-	1	0.1015	0.013-0.19	2	CO
1-Pentene	0.0220419	0.00883669	6	0.0576981	-	1	0.0475414	0.0244782	7	0.0463345	0.0246647	3	0.11	-	1	0.0152447	0.010784	5	1-Pentene	0.0256	0.0297926	6	0.110667	0.06376	3	-	-	0	0.0275907	-	1	0.731	-	1	0.023	0.0145831	4	CO
2-Pentenes	0.01445	0.0198275	4	0.0258423	-	0	0.0426	0.0225233	5	0.0110898	0.006-0.016	2	0.062	-	1	0.023	0.00496655	4	2-Pentenes	0.0203644	0.02-0.02	2	0.0896667	0.0705006	3	-	-	0	0.0511561	-	0	0.3	-	1	0.07875	0.0726516	4	CO
n-Pentane	0.00655878	0.00822359	11	0.0143669	-	1	0.0335643	0.0261244	10	0.0502776	0.0147003	6	0.243	-	1	0.0416405	0.0568399	7	n-Pentane	0.0179305	0.020585	8	0.0926667	0.0876432	3	-	-	0	0.0955192	-	1	1.08	-	1	0.0680846	0.0589448	5	CO
2-Methyl-butenes	0.024826	0.0368836	7	0.0752136	-	1	0.0555658	0.0447121	6	0.0506168	-	0	0.125	-	1	0.0261738	0.0125111	5	2-Methyl-butenes	0.0137	0.0124133	3	0.0363333	0.0205508	3	-	-	0	0.0153282	-	1	0.0412	-	1	0.059	0.0416053	3	CO
2-Methyl-butane	0.00756385	0.00891585	10	0.00754869	-	1	0.0165576	0.0109392	8	0.0315915	0.0163984	6	0.123	-	1	0.0192	0.013572	5	2-Methyl-butane	0.0446615	0.0427584	4	0.344	0.408643	3	-	-	0	0.0711888	-	1	0.391	-	1	0.1082	0.0926613	3	CO
n-Pentadienes	0.048	-	1	0.0421188	-	0	0.03525	0.0160494	4	0.0487768	-	0	0.100488	-	0	0.0297395	-	0	n-Pentadienes	0.0168	0.0149408	4	0.0385	0.02-0.06	2	-	-	0	0.0833765	-	0	0.0261268	-	0	0.0205	0.017-0.024	2	CO
Isoprene	0.100539	0.15801	10	0.217932	0.016-0.42	2	0.09508	0.0511915	9	0.074	-	1	0.518	0.05-0.98	2	0.174857	0.262511	7	Isoprene	0.0578527	0.0487812	10	0.200667	0.118509	3	-	-	0	0.117008	0.017-0.22	2	0.067	-	1	0.406377	0.424664	14	CO
Cyclopentene	0.0194084	0.0156879	4	0.0217682	-	0	0.0410444	0.0188353	5	0.0252092	-	0	0.025	-	1	0.007	0.00173205	3	Cyclopentene	0.0078	-	1	0.0184897	-	0	-	-	0	0.0353078	-	1	0.013503	-	0	0.02065	0.0117568	4	CO
Cyclopentadiene	0.026	-	1	0.0356003	-	0	0.027	0.025-0.029	2	0.0412278	-	0	0.01	-	1	0.001	-	1	Cyclopentadiene	0.0605	0.0473885	4	0.0302385	-	0	-	-	0	0.0704726	-	0	0.0220832	-	0	0.0406667	0.0325167	3	CO
4-Methyl-1-pentene	0.0493894	-	1	0.0488396	-	1	0.040677	-	0	0.0435875	-	0	0.089797	-	0	0.0053569	0.00676327	4	4-Methyl-1-pentene	0.0154515	-	1	0.0319693	-	0	-	-	0	0.0745062	-	0	0.0233472	-	0	0.0049	0.002-0.008	2	CO
2--Methyl-1-pentene	0.0184	0.0324291	4	0.0373183	-	0	0.0581	0.0270671	3	0.0432174	-	0	0.109	-	1	0.0263499	-	0	2--Methyl-1-pentene	0.0294079	-	0	0.0316978	-	0	-	-	0	0.0738735	-	0	0.023149	-	0	0.019	-	1	CO
1-Hexene	0.0429678	0.0183786	6	0.0649134	-	1	0.084423	0.0223354	3	0.108657	-	1	0.135785	-	0	0.0117934	0.0045286	3	1-Hexene	0.0182	0.00668581	5	0.114	0.06-0.17	2	-	-	0	0.112663	-	0	0.0353041	-	0	0.06425	0.0360405	4	CO
Hexadienes	0.006	-	1	0.00732532	-	0	0.00605	0.006-0.006	2	0.00848326	-	0	0.0174768	-	0	0.0051723	-	0	Hexadienes	0.00577256	-	0	0.00622205	-	0	-	-	0	0.0145009	-	0	0.00454398	-	0	0.0465	0.028-0.065	2	CO
n-Hexane	0.01817	0.0278153	10	0.0319459	-	0	0.0319594	0.040347	10	0.0541007	0.0346814	3	0.143	-	1	0.03175	0.0588635	4	n-Hexane	0.00871667	0.00575514	6	0.116667	0.152231	3	-	-	0	0.184623	0.063-0.31	2	0.282	-	1	0.0344	0.0288393	4	CO
Isohexanes	0.0190928	0.0278735	3	0.0483627	-	0	0.0258875	0.0382778	8	0.0129199	0.008-0.018	2	0.054	-	1	0.06725	0.115376	4	Isohexanes	0.0651333	0.0843318	3	0.180333	0.277039	3	-	-	0	0.0957365	-	0	0.28	-	1	0.113667	0.120583	3	CO
Heptanes	0.0158719	0.0188753	6	0.0238643	-	0	0.0286016	0.0258198	8	0.0209	0.018-0.024	2	0.112	-	1	0.031	0.033116	4	Heptanes	0.00548333	0.00317516	6	0.114	-	1	-	-	0	0.0472406	-	0	0.231	-	1	0.113	0.129835	3	CO
Octenes	0.0212607	0.026743	3	0.0123652	-	1	0.0358688	0.0232686	5	0.0212491	-	0	0.065	-	1	0.00333332	-	1	Octenes	0.0074	0.0137375	4	0.0155851	-	0	-	-	0	0.0363221	-	0	0.0113819	-	0	0.044	0.0383145	3	CO
Terpenes	0.103843	0.0960457	5	0.15	-	0	1.1683	1.94693	9	1.53	-	1	0.082	0.005-0.16	2	0.0293333	0.0308275	3	Terpenes	0.100271	0.144249	7	0.118767	0.198525	3	-	-	0	-	-	0	0.092	-	1	0.4549	0.569664	10	CO
Benzene	0.330094	0.222542	18	0.377537	0.0531561	4	0.390993	0.201275	16	0.569629	0.213997	7	0.867	0.78-0.95	2	0.281197	0.201313	15	Benzene	0.952658	0.890391	17	1.25333	0.625646	3	-	-	0	1.23038	0.72-1.7	2	2.61	-	1	0.671796	0.84398	20	CO
Toluene	0.196439	0.143769	16	0.233635	0.0404698	4	0.252658	0.16527	15	0.352684	0.109899	6	0.445	0.37-0.52	2	0.162578	0.100283	15	Toluene	0.44563	0.510042	14	0.867667	0.388557	3	-	-	0	0.409477	0.20-0.62	2	0.817	-	1	0.45375	0.573827	20	CO
Xylenes	0.0859478	0.0774396	8	0.0864823	0.0494768	3	0.158815	0.090079	9	0.105662	0.0161875	3	0.225	-	1	0.0886068	0.110088	9	Xylenes	0.131624	0.146612	10	0.315	0.281761	3	-	-	0	0.162093	0.099-0.23	2	0.57	-	1	0.140343	0.110668	8	CO
Ethylbenzene	0.0219844	0.0100803	8	0.0428019	0.0338994	3	0.040755	0.0180589	10	0.038078	0.0114096	3	0.042	-	1	0.0453906	0.0489489	7	Ethylbenzene	0.097647	0.102351	7	0.166	0.176136	3	-	-	0	0.0532576	0.033-0.074	2	0.498	-	1	0.125467	0.17562	6	CO
Styrene	0.0561374	0.0290636	6	0.028	-	0	0.06569	0.0279771	8	0.127108	-	0	0.0545	0.027-0.082	2	0.0433333	0.0291113	6	Styrene	0.182965	0.189297	8	0.133333	0.106228	3	-	-	0	0.143163	0.066-0.22	2	0.0680843	-	0	0.0774545	0.0655383	11	CO
PAHs	0.0116	0.0157641	4	0.143288	-	0	0.0166833	0.0189414	6	0.718	-	1	0.389033	-	0	0.0330913	0.0174168	4	PAHs	0.0910223	0.095928	13	0.023	-	1	-	-	0	0.533041	0.41-0.66	2	0.0113498	-	1	0.0608813	0.119366	11	CO
Methanol	1.34788	0.470323	14	2.79602	0.45937	4	2.15652	0.870294	19	2.33187	1.44511	13	2.54333	0.35949	3	2.62812	1.42572	8	Methanol	2	1.11183	9	3.21	1.13264	4	12.9513	6.149	3	0.9815	0.72-1.24	2	0.8615	0.8-0.9	2	2.16634	2.3983	26	---
Ethanol	0.03615	0.017-0.055	2	0.0674566	-	0	0.0755143	0.0886253	7	0.058179	0.0627528	3	0.160939	-	0	0.0476302	-	0	Ethanol	0.075	0.02-0.13	2	0.226667	0.291798	3	0.0600906	-	0	0.133534	-	0	0.087	-	1	0.0843735	0.072-0.097	2	CO
1-Propanol	0.025	-	1	0.0377193	-	0	0.040765	-	0	0.0436818	-	0	0.0899913	-	0	0.0266331	-	0	1-Propanol	0.0297239	-	0	0.0320384	-	0	-	-	0	0.0746674	-	0	0.0233977	-	0	0.247913	-	1	CO
2-Propanol	0.0809305	-	0	0.122106	-	0	0.131965	-	0	0.141408	-	0	0.291322	-	0	0.0862172	-	0	2-Propanol	0.0962229	-	0	0.103716	-	0	-	-	0	0.241715	-	0	0.0757437	-	0	0.107299	0.005-0.21	2	LV
Butanols	0.108182	0.008-0.21	2	0.00884766	-	1	0.0635	0.029-0.098	2	0.0722108	-	0	0.148765	-	0	0.0113226	-	1	Butanols	0.05115	0.01-0.10	2	0.052963	-	0	-	-	0	0.123433	-	0	0.038679	-	0	0.019	0.013-0.025	2	CO
Cyclopentanol	0.033049	-	1	0.0316347	-	1	0.0377134	-	0	0.0404119	-	0	0.0832548	-	0	0.0163735	-	1	Cyclopentanol	0.0274988	-	0	0.0296401	-	0	-	-	0	0.069078	-	0	0.0216462	-	0	-	-	0	CO
Phenol	0.431908	0.187431	7	0.22788	0.006-0.45	2	0.251667	0.0938527	3	0.634063	-	0	0.4655	0.42-0.51	2	0.50149	0.491003	4	Phenol	0.721	1.15338	7	1.584	1.0-2.2	2	4.66804	2.8-6.6	2	2	-	1	0.414	-	1	1.09589	1.16411	15	CO
Formaldehyde	1.22815	0.648625	16	2.4	0.632218	3	2.08416	0.701085	15	1.74606	0.400785	4	1.07233	0.442319	3	1.79571	0.655708	7	Formaldehyde	0.868615	1.00113	13	2.42	-	1	1.06	-	1	0.514667	0.190416	3	1.475	0.62-2.3	2	1.44182	0.659235	26	---
Acetaldehyde	0.844016	0.650056	9	2.26	1.55-2.97	2	1.07316	0.620888	13	0.814067	0.22655	4	1.1635	0.70-1.63	2	1.715	1.1694	4	Acetaldehyde	0.406462	0.321609	13	1.46167	0.575768	3	-	-	0	0.127	-	1	2.12	-	1	1.36194	0.816849	17	CO
Hydroxyacetaldehyde (glycolaldeh.)	0.209966	0.175881	5	0.416656	-	0	0.39	-	1	0.482519	-	0	0.108	-	1	3.18	2.3-4.1	2	Hydroxyacetaldehyde (glycolaldeh.)	0.451	0.211028	3	0.499	-	1	-	-	0	0.824792	-	0	2.41	-	1	0.913457	0.841044	9	CO
Glyoxal	0.395979	-	0	0.597443	-	0	0.645683	-	0	0.691884	-	0	1.42539	-	0	0.228798	-	1	Glyoxal	0.575	-	1	0.507463	-	0	-	-	0	1.18267	-	0	0.370601	-	0	0.636	0.396648	5	CO
Methylglyoxal	0.395	0.15-0.64	2	0.524852	-	0	0.27	-	1	0.607818	-	0	0.229	-	1	0.554	-	1	Methylglyoxal	0.386	0.18-0.60	2	0.445804	-	0	-	-	0	1.03897	-	0	0.325572	-	0	0.434	0.238037	8	CO
Acolein (Propenal)	0.475567	0.253913	6	0.65	-	1	0.339211	0.131523	7	0.334916	-	1	0.273	-	1	0.6475	0.446738	4	Acolein (Propenal)	0.0853636	0.0931121	11	0.2405	0.19-0.30	2	-	-	0	0.988438	-	0	0.309736	-	0	0.595053	0.394243	11	CO
Propanal	0.0531803	0.009-0.097	2	0.1	-	1	0.0866642	0.039527	4	0.244099	-	1	0.325168	-	0	0.18	-	1	Propanal	0.0722	0.0686659	8	0.115765	-	0	-	-	0	0.269798	-	0	0.0845437	-	0	0.1855	0.210489	5	CO
Butanals	0.113751	0.054-0.220	2	0.126417	0.073-0.18	2	0.109205	0.070594	5	0.156008	-	0	0.024	-	1	0.169792	0.02-0.32	2	Butanals	0.0268	0.0188242	11	0.0683333	0.0347898	3	-	-	0	0.266672	-	0	0.259	-	1	0.11	0.115779	4	CO
Methacrolein	0.106765	-	0	0.15	-	1	0.1416	0.178978	5	0.106911	0.117863	3	0.384318	-	0	0.28	-	1	Methacrolein	0.028	0.025-0.031	2	0.136824	-	0	-	-	0	0.318876	-	0	0.0999226	-	0	0.113	0.046-0.18	2	CO
Crotonaldehyde	0.245276	-	0	0.24	-	1	0.399947	-	0	0.428565	-	0	0.882909	-	0	0.42	-	1	Crotonaldehyde	0.217	-	1	0.314331	-	0	-	-	0	0.732566	-	0	0.229556	-	0	0.121	0.138098	3	CO
Hexanals	0.048379	0.0683726	3	0.0206359	0.010-0.031	2	0.0382511	0.0333814	4	0.0383687	-	0	0.0790455	-	0	0.0204916	0.011-0.03	2	Hexanals	0.006	0.00264575	3	0.0281416	-	0	-	-	0	0.0655855	-	0	0.0205518	-	0	0.0055	0.003-0.008	2	CO
Heptanals	0.0028682	0.001-0.005	2	0.00353502	-	1	0.00474299	-	0	0.00508236	-	0	0.0104704	-	0	0.000775278	-	1	Heptanals	0.00345836	-	0	0.00372766	-	0	-	-	0	0.00868752	-	0	0.00272232	-	0	0.0074	0.004-0.011	2	CO
Acetone	0.469581	0.17924	7	0.63	-	1	0.5753	0.423505	11	1.59429	1.60687	7	0.9055	0.69-1.12	2	0.60725	0.472924	4	Acetone	0.345873	0.225177	11	1.46167	0.688119	3	0.264353	-	1	1.49998	-	0	2.3	-	1	0.73431	0.390703	14	CO
2-Butanone	0.130856	0.0759878	6	0.5	-	1	0.227347	0.210823	9	0.159106	0.0351516	5	0.338	0.14-0.54	2	0.595	0.29-0.90	2	2-Butanone	0.0954417	0.0640785	12	0.310667	0.168361	3	0.298266	-	0	0.66281	-	0	0.212	-	1	0.26842	0.228634	11	CO
2,3-Butanedione	0.3515	0.224328	4	0.73	-	1	0.890595	0.863313	5	0.337859	-	1	0.324	-	1	1.23	1.15-1.31	2	2,3-Butanedione	0.2115	0.01-0.41	2	0.620978	-	0	0.651255	-	0	1.44723	-	0	0.453502	-	0	0.625107	0.435076	9	CO
1-Butene-3-one (Methylvinyl ketone)	0.227	-	1	0.39	-	1	0.165	0.108881	5	0.0989729	0.097-0.10	2	0.057	-	1	0.475	0.25-0.70	2	1-Butene-3-one (Methylvinyl ketone)	0.058	0.05-0.07	2	0.2045	0.13-0.28	2	0.254911	-	0	0.566466	-	0	0.177507	-	0	0.293	0.13-0.46	2	CO
Pentanones	0.0145168	0.00556725	3	0.0592356	0.028-0.090	2	0.0663727	0.0334853	5	0.0754943	-	0	0.075	-	1	0.103509	0.007-0.20	2	Pentanones	0.029	-	1	0.0553714	-	0	-	-	0	0.129046	-	0	0.0404378	-	0	0.08575	0.0786485	4	CO
Hexanones	0.048	-	1	0.0567982	-	0	0.0445	0.043-0.046	2	0.0657766	-	0	0.13551	-	0	0.0401044	-	0	Hexanones	0.0447586	-	0	0.0482439	-	0	-	-	0	0.112435	-	0	0.0352326	-	0	0.01685	0.007-0.027	2	CO
Heptanones	0.00582985	-	1	0.00179747	-	1	0.00494639	-	0	0.00530032	-	0	0.0109195	-	0	0.00221508	-	1	Heptanones	0.00360668	-	0	0.00388752	-	0	-	-	0	0.00906009	-	0	0.00283906	-	0	0.063	0.009-0.12	2	CO
Octanones	0.0150733	-	1	0.0194263	-	1	0.0227867	-	0	0.0244171	-	0	0.0503031	-	0	0.0148873	-	0	Octanones	0.016615	-	0	0.0179088	-	0	-	-	0	0.0417374	-	0	0.0130788	-	0	0.0047	-	1	CO
Benzaldehyde	0.102235	0.0967941	4	0.0272838	-	1	0.131667	0.0767094	3	0.0961251	-	0	0.056	-	1	0.0392028	0.008-0.07	2	Benzaldehyde	0.0442375	0.0484542	8	0.070503	-	0	-	-	0	0.164311	-	0	0.0514885	-	0	0.0705	0.0296245	10	CO
Acetol (hydroxyacetone)	0.555667	0.337135	3	1.36425	-	0	1.13	-	1	1.5799	-	0	0.6385	0.42-0.86	2	1.74333	0.293655	3	Acetol (hydroxyacetone)	0.87	0.48-1.26	2	6.395	3.2-9.6	2	9.38117	-	1	2.7006	-	0	1.68	-	1	1.7125	2.68605	10	CO
Furan	0.293997	0.136019	8	0.328775	0.25-0.41	2	0.405279	0.262247	8	0.358734	0.28-0.44	2	1.068	0.74-1.4	2	0.500333	0.474015	3	Furan	0.19925	0.103305	8	0.493	0.351654	4	0.801878	0.45-1.2	2	0.393	-	1	0.213	-	1	0.630844	0.650128	18	---
2-Methyl-furan	0.199549	0.141806	6	0.276777	0.277212	3	0.336679	0.213359	5	0.428639	-	0	0.3105	0.12-0.50	2	0.531049	0.519427	3	2-Methyl-furan	0.164833	0.0774685	6	0.3025	0.12-0.49	2	-	-	0	0.732693	-	0	0.229596	-	0	0.345977	0.299526	10	CO
3-Methyl-furan	0.0100752	0.00356296	3	0.0550773	0.030-0.080	2	0.0339422	0.0162858	3	0.0524317	-	0	0.108018	-	0	0.0763935	0.003-0.15	2	3-Methyl-furan	0.013	-	1	0.0384561	-	0	-	-	0	0.0896241	-	0	0.0280846	-	0	0.227173	0.365329	4	CO
2-Ethylfuran	0.00531949	0.001-0.009	2	0.0033986	-	1	0.0159602	0.0118643	5	0.00777963	-	0	0.0160273	-	0	0.00047916	-	1	2-Ethylfuran	0.00529376	-	0	0.00570598	-	0	-	-	0	0.0132981	-	0	0.00416709	-	0	0.007	-	1	CO
2,4-Dimethyl-furan	0.008438	-	1	0.0241269	-	1	0.0117053	-	0	0.0125428	-	0	0.0258401	-	0	0.00217554	-	1	2,4-Dimethyl-furan	0.00266667	0.00057735	3	0.00919954	-	0	-	-	0	0.02144	-	0	0.00671844	-	0	0.01	-	1	CO
2,5-Dimethyl-furan	0.0632959	0.0666154	4	0.085814	-	0	0.069761	0.0699909	5	0.0993791	-	0	0.139	-	1	0.098	-	1	2,5-Dimethyl-furan	0.035	0.008544	3	0.0728896	-	0	-	-	0	0.169873	-	0	0.0532314	-	0	0.150523	0.179483	8	CO
Tetrahydrofuran	0.00913918	0.002-0.016	2	0.0165556	-	1	0.001119	0.0005-0.0017	2	0.0113438	-	0	0.0233699	-	0	0.00550855	-	1	Tetrahydrofuran	0.00771903	-	0	0.0083201	-	0	-	-	0	0.0193905	-	0	0.00607618	-	0	0.00175	0.002-0.002	2	CO
2,3-Dihydrofuran	0.013763	0.013-0.015	2	0.0135172	-	1	0.00255	0.001-0.004	2	0.0126088	-	0	0.0259761	-	0	0.00487833	-	1	2,3-Dihydrofuran	0.00857985	-	0	0.00924795	-	0	-	-	0	0.0215529	-	0	0.00675379	-	0	0.011	-	1	CO
Benzofuran	0.0447221	0.0396889	4	0.0157295	-	1	0.093551	0.0705748	3	0.060715	-	0	0.032	-	1	0.0240052	0.004-0.044	2	Benzofuran	0.046	-	1	0.0445315	-	0	-	-	0	0.103783	-	0	0.0325214	-	0	0.0342222	0.00993451	9	CO
Furfural (2-Furaldehyde)	0.728667	0.737391	3	0.783463	-	0	0.522426	0.808706	7	0.607441	-	1	1.102	0.12-2.1	2	1.03	-	1	Furfural (2-Furaldehyde)	0.2768	0.372346	5	0.20075	0.09-0.32	2	1.58612	-	1	1.55091	-	0	0.485991	-	0	1.08321	0.683112	9	CO
Methyl formate	0.073	-	1	0.0510816	-	0	0.0242	0.022-0.027	2	0.0239864	-	1	0.121871	-	0	0.036068	-	0	Methyl formate	0.0402537	-	0	0.0433882	-	0	-	-	0	0.101119	-	0	0.0316865	-	0	0.0427856	-	1	CO
Methyl acetate	0.158877	0.059-0.26	2	0.134074	-	0	0.0954032	0.0581567	5	0.0869354	-	1	0.319877	-	0	0.0946681	-	0	Methyl acetate	0.105	0.05-0.17	2	0.113882	-	0	-	-	0	0.265408	-	0	0.083168	-	0	0.086904	0.100611	3	CO
Acetonitrile	0.165881	0.074118	9	0.494994	0.143218	3	0.2277	0.177607	13	0.3084	0.0989878	6	0.601	-	1	0.23	0.255215	6	Acetonitrile	0.0995	0.02-0.18	2	-	-	0	-	-	0	-	-	0	-	-	0	0.204168	0.163575	15	CO
Acrylonitrile	0.0366667	0.00945163	3	0.04	-	1	0.03125	0.0136261	6	0.0683178	-	0	-	-	0	0.0936667	0.0606658	3	Acrylonitrile	0.03	-	1	-	-	0	-	-	0	-	-	0	-	-	0	0.0823575	0.117433	5	CO
Propionitrile	0.02685	0.012-0.042	2	0.09	-	1	0.01145	0.011-0.012	2	0.110558	-	0	-	-	0	0.17	-	1	Propionitrile	-	-	0	-	-	0	-	-	0	-	-	0	-	-	0	0.135443	0.265338	5	CO
Pyrrole	0.013	-	1	0.12	-	1	0.0615	0.0853306	3	0.147103	-	0	-	-	0	0.22	-	1	Pyrrole	-	-	0	-	-	0	-	-	0	-	-	0	-	-	0	0.162	0.224007	3	CO
Trimethylpyazole	-	-	0	-	-	0	-	-	0	-	-	0	-	-	0	-	-	0	Trimethylpyazole	-	-	0	-	-	0	-	-	0	-	-	0	-	-	0	0.124	-	1	LV
Methylamine	-	-	0	-	-	0	-	-	0	-	-	0	-	-	0	-	-	0	Methylamine	-	-	0	-	-	0	-	-	0	-	-	0	-	-	0	0.0568906	-	1	LV
Dimethylamine	-	-	0	-	-	0	-	-	0	-	-	0	-	-	0	-	-	0	Dimethylamine	-	-	0	-	-	0	-	-	0	-	-	0	-	-	0	0.0619414	-	1	LV
Ethylamine	-	-	0	-	-	0	-	-	0	-	-	0	-	-	0	-	-	0	Ethylamine	-	-	0	-	-	0	-	-	0	-	-	0	-	-	0	0.00535178	0.0004-0.010	2	LV
Trimethylamine	-	-	0	-	-	0	-	-	0	-	-	0	-	-	0	-	-	0	Trimethylamine	-	-	0	-	-	0	-	-	0	-	-	0	-	-	0	0.0406005	-	1	LV
n-Pentylamine	-	-	0	-	-	0	-	-	0	-	-	0	-	-	0	-	-	0	n-Pentylamine	-	-	0	-	-	0	-	-	0	-	-	0	-	-	0	0.439075	-	1	LV
2-Methyl-1-butylamine	-	-	0	-	-	0	-	-	0	-	-	0	-	-	0	-	-	0	2-Methyl-1-butylamine	-	-	0	-	-	0	-	-	0	-	-	0	-	-	0	0.139706	-	1	LV
Formic acid	0.304938	0.210537	14	0.877122	0.63147	4	1.1131	1.26653	12	1.91114	2.23882	8	0.294	0.141237	3	0.860714	0.887427	7	Formic acid	0.311508	0.274273	6	0.6255	0.34-0.91	2	0.39	0.33-0.45	2	0.119333	0.0400042	3	0.417	0.38-0.45	2	0.535125	0.490344	26	---
Acetic acid	2.31303	1.80565	13	3.28333	0.841982	3	2.74097	1.60171	11	3.79757	2.03531	4	4.91333	0.974389	3	4.61914	3.36646	7	Acetic acid	3.94491	3.6573	6	10.81	7.3-14.3	2	46.8262	47.0314	3	1.845	0.49-3.2	2	1.646	0.87-2.4	2	3.73789	3.86386	30	---
H2	0.973859	0.351572	6	3.09253	0.690929	5	2.0925	0.434233	4	1.63572	0.372332	8	1.22	-	1	2.645	2.6-2.7	2	H2	1.83713	-	0	1.98018	-	0	-	-	0	4.61492	-	0	1.44613	-	0	-	-	0	CO
NOx (as NO)	2.48585	1.34139	18	2.81264	1.32068	7	3.0179	1.78788	16	1.17713	0.858774	11	1.23704	0.31-2.2	2	2.58639	1.13169	18	NOx (as NO)	1.2778	0.689565	18	2.74919	3.87495	5	0.237422	0.428588	5	2.34556	1.77284	7	2.2113	-	1	2.1099	0.837346	32	---
HONO	0.472391	0.21051	6	0.853	-	1	0.3314	0.168854	5	0.41	-	1	0.3505	0.21-0.49	2	0.365333	0.0369098	3	HONO	0.3715	0.29-0.45	2	0.257	0.24-0.28	2	-	-	0	0.295	0.17-0.42	2	0.493	-	1	0.356353	0.198419	17	---
N2O	0.179569	0.0938517	11	0.2	-	0	0.253333	0.116762	3	0.237424	0.0591845	5	-	-	0	0.0924	0.03945	5	N2O	0.0682155	0.0158615	4	0.31	-	1	0.0245522	0.0140703	4	0.343124	0.365757	3	-	-	0	0.0713736	0.00644917	4	AV
NH3	0.895137	0.486132	16	1.33512	0.776678	4	0.976562	0.690012	22	2.46	1.74944	4	4.15333	3.22101	3	0.934677	0.622094	13	NH3	0.4196	0.512738	5	3.1	2.15949	4	3.79012	7.19802	4	0.72225	0.490055	4	0.8955	0.67-1.12	2	1.20539	1.0036	27	---
HCN	0.440522	0.257611	16	0.438949	0.2091	5	0.635866	0.391401	12	0.533122	0.297712	11	4.39667	1.17411	3	0.432667	0.191964	6	HCN	0.389	0.22-0.56	2	1.27	0.53-2.0	2	0.0900446	-	1	-	-	0	0.432	-	1	0.785295	1.08064	23	---
Cyanogen, (CN)2	-	-	0	-	-	0	-	-	0	-	-	0	-	-	0	-	-	0	Cyanogen, (CN)2	-	-	0	-	-	0	-	-	0	-	-	0	-	-	0	0.00669187	-	1	---
N2	2.64	-	0	2.64	-	0	2.64	-	0	2.64	-	0	-	-	0	2.64	-	0	N2	2.64	-	0	-	-	0	-	-	0	-	-	0	-	-	0	4.12893	-	1	LV
SO2	0.465178	0.4441	12	0.770912	0.370738	3	0.6998	0.475027	5	0.75	0.14-0.31	2	4.26	-	1	0.8	0.70612	10	SO2	0.561031	0.695601	14	0.656	0.604305	4	0.2	-	1	0.566	0.553957	3	-	-	0	0.874837	0.920086	23	AV
Dimethyl sulfide (DMS)	0.00835	0.0112123	5	0.0022	-	1	0.0143667	0.0154662	3	0.0023	-	1	0.0454	0.003-0.088	2	0.068	-	1	Dimethyl sulfide (DMS)	0.1188	0.127841	3	0.0253333	0.0170392	3	-	-	0	-	-	0	0.0074	-	1	0.12305	0.190402	8	AV
COS	0.0375675	0.045032	4	0.0776323	0.0458408	3	0.0351494	0.0443657	6	0.0576954	0.0313083	3	0.11	-	1	0.0587034	0.0697095	4	COS	0.0167	0.01-0.02	2	0.208	0.125284	3	-	-	0	-	-	0	0.074	-	1	0.0318828	0.0401883	3	---
HCl	0.132667	0.104006	3	0.129355	-	0	0.0386333	0.0311256	3	0.129355	-	0	0.0075	-	1	0.175833	0.254766	3	HCl	0.075	-	1	0.038	-	1	-	-	0	0.11	-	1	2.32	-	1	0.224643	0.246247	7	AV
CH3Cl	0.0635921	0.0670475	15	0.0289607	0.02-0.04	2	0.0422376	0.0556563	8	0.0596352	0.0333271	4	0.147	-	1	0.164614	0.134024	4	CH3Cl	0.0718537	0.102251	6	2.16667	2.22534	3	-	-	0	0.0114628	-	1	0.702	-	1	0.156946	0.149364	8	---
CH3Br	0.0029174	0.00522545	13	0.00778627	0.005-0.010	2	0.00150318	0.000960477	3	0.00292616	0.00113113	4	0.01	-	1	0.00113067	-	1	CH3Br	0.000675	0.0006-0.0008	2	0.00873333	0.0048645	3	-	-	0	-	-	0	0.0022	-	1	0.000757835	0.0005-0.001	2	CO
CH3I	0.000676489	0.000621692	9	0.00680247	-	1	0.000480706	0.0004-0.001	2	0.00039	-	1	0.012	-	1	0.000169041	-	1	CH3I	0.0001095	0.0001-0.0001	2	0.000643	0.000222344	3	-	-	0	-	-	0	0.00032	-	1	-	-	0	CO
Hg0	4.81867e-05	4.21299e-05	4	0.000102259	4.7E-5-1.7E-4	2	0.000202117	0.000175496	6	0.00022825	0.000301703	6	-	-	0	5.06e-05	5.00068e-05	3	Hg0	4.74e-05	6.8E-6-8.8E-5	2	-	-	0	-	-	0	-	-	0	-	-	0	3.7e-05	-	1	---
PM2.5	6.7041	3.32662	20	8.32222	3.3255	9	18.1106	14.5115	28	18.7322	15.9066	5	17.3	-	1	8.15278	4.40062	18	PM2.5	6.88011	4.4081	57	16.475	13.0172	8	20.1374	2.1-38.2	2	3.04857	2.53362	7	7.37	-	1	10.3921	11.2938	22	---
TPM	8.72011	3.13461	11	10.9309	5.31381	4	18.3591	8.30978	11	15.3	12.3-18.3	2	26.2491	-	0	11.614	8.13044	5	TPM	6.96213	5.83267	27	6.084	6.04138	5	13.8379	19.3039	4	2.065	1.7-2.4	2	-	-	0	8.11739	6.14828	12	CO
TC	3.15954	1.54321	10	5.50488	1.59403	4	8.37	2.16562	3	9.89963	-	0	12.5903	-	0	4.88838	3.8619	18	TC	3.42549	1.36875	28	8.06885	9.91242	4	-	-	0	2.0202	2.02832	5	6.86799	-	0	6.52743	9.10203	7	BE
OC	2.78477	1.33347	13	4.44986	1.93064	5	9.38685	5.59581	12	7.48903	-	1	12.4	-	1	4.46752	3.5953	16	OC	3.13589	2.04473	65	10.1868	9.44526	6	0.75	-	1	2.17325	2.01929	4	5.48745	5.3-5.7	2	4.81773	4.65433	22	---
BC	0.534221	0.365123	17	0.506085	0.338209	8	0.552205	0.355272	14	0.533515	0.0755268	3	0.1903	-	1	0.420859	0.266601	20	BC	0.810464	1.19557	65	0.310951	0.261433	7	0.02	-	1	0.269333	0.147137	3	1.38054	4.50074	3	0.55304	0.40481	25	---
Levoglucosan	0.0546667	-	1	0.42	-	1	1.32254	1.20544	6	1.3499	-	1	0.572976	-	1	0.731522	0.662847	6	Levoglucosan	0.496584	0.41659	13	0.45225	0.16-0.74	2	0.064	-	1	0.78966	-	1	0.40107	0.25-0.56	2	0.459764	0.459525	12	---
K	0.396716	0.237926	12	0.322949	0.224466	4	0.169044	0.1618	4	0.17	-	0	0.004498	-	1	0.494082	0.457137	8	K	0.129464	0.24463	22	0.09135	0.102713	4	0.004	-	1	0.752027	0.794358	3	0.0162486	0.01-0.02	2	0.363676	0.33891	20	BE
CN	2.74049e+16	2.36572e+16	4	3.94177e+15	1.2619e+15	3	9883229575560054	-	0	4200000000000000	-	1	-	-	0	5366666666666667	2218250061046620	3	CN	2930500000000000	3.04832e+15	4	-	-	0	-	-	0	4850000000000000	2.5E+15-7.2E+15	2	5672645861476872	-	0	1.14367e+15	1.95404e+15	3	CO
CCN (0.5% SS)	7.90575e+14	-	1	1668194008196633	1.65E+15-1.68E+15	2	2.01517e+15	3.36915e+15	3	1.63714e+15	-	0	-	-	0	9.98174e+14	-	0	CCN (0.5% SS)	1.11401e+15	-	0	-	-	0	-	-	0	-	-	0	-	-	0	800000000000000	-	1	CO
N(>~ 0.12 µm diameter)	9.07191e+14	6.12445e+14	3	2749586103962289	-	1	1000000000000000	-	0	1000000000000000	-	0	-	-	0	1000000000000000	-	0	N(>~ 0.12 µm diameter)	1000000000000000	-	0	-	-	0	-	-	0	-	-	0	-	-	0	-	-	0	CO
a) Emission factors are given in gram species per kilogram dry matter burned. See text for the conventions used for reporting uncertainties. Abbreviations
are as follows: PM2.5, particulate matter <2.5 mm diameter; TPM, total particulate matter; TC, total carbon; BC, black carbon; CN, condensation nuclei;
CCN(0.5% SS), cloud condensation nuclei at 0.5% supersaturation; and N(>~0.12 mm diam), particles > ~0.12 µm diameter. Values in italics represent estimates for
emission factors that have not been measured directly.
b) Estimation method for emission factors for which no measurements are available. See text section 2.4 for details.
[truncated: 65 more columns]

## Sheet: References
Adams, C., McLinden, C. A., Shephard, M. W., Dickson, N., Dammers, E., Chen, J., Makar, P., Cady-Pereira, K. E., Tam, N., Kharol, S. K., Lamsal, L. N., and Krotkov, N. A., Satellite-derived emissions of carbon monoxide, ammonia, and nitrogen dioxide from the 2016 Horse River wildfire in the Fort McMurray area: Atmos. Chem. Phys., 19, 2577-2599, doi:10.5194/acp-19-2577-2019, 2019.
Akagi, S. K., Yokelson, R. J., Wiedinmyer, C., Alvarado, M. J., Reid, J. S., Karl, T., Crounse, J. D., and Wennberg, P. O., Emission factors for open and domestic biomass burning for use in atmospheric models: Atmos. Chem. Phys., 11, 4039-4072, doi:10.5194/acpd-10-27523-2010, 2011.
Akagi, S. K., Yokelson, R. J., Burling, I. R., Meinardi, S., Simpson, I. J., Blake, D. R., McMeeking, G. R., Sullivan, A., Lee, T., Kreidenweis, S., Urbanski, S., Reardon, J., Griffith, D. W. T., Johnson, T. J., and Weise, D. R., Measurements of reactive trace gases and variable O3 formation rates in some South Carolina biomass burning plumes: Atmos. Chem. Phys., 13, 1141-1165, doi:10.5194/acpd-1…
Akagi, S. K., Burling, I. R., Mendoza, A., Johnson, T. J., Cameron, M., Griffith, D. W. T., Paton-Walsh, C., Weise, D. R., Reardon, J., and Yokelson, R. J., Field measurements of trace gases emitted by prescribed fires in southeastern US pine forests using an open-path FTIR system: Atmos. Chem. Phys., 14, 199-215, doi:10.5194/acp-14-199-2014, 2014.
Alvarado, M. J., Logan, J. A., Mao, J., Apel, E., Riemer, D., Blake, D., Cohen, R. C., Min, K. E., Perring, A. E., Browne, E. C., Wooldridge, P. J., Diskin, G. S., Sachse, G. W., Fuelberg, H., Sessions, W. R., Harrigan, D. L., Huey, G., Liao, J., Case-Hanks, A., Jimenez, J. L., Cubison, M. J., Vay, S. A., Weinheimer, A. J., Knapp, D. J., Montzka, D. D., Flocke, F. M., Pollack, I. B., Wennberg, P.…
Alves, C., Gonçalves, C., Fernandes, A. P., Tarelho, L., and Pio, C., Fireplace and woodstove fine particle emissions from combustion of western Mediterranean wood types: Atmos. Res., 101, 692-700, doi:10.1016/j.atmosres.2011.04.015, 2011a.
Alves, C., Vicente, A., Nunes, T., Gonçalves, C., Fernandes, A. P., Mirante, F., Tarelho, L., Sánchez de la Campa, A. M., Querol, X., Caseiro, A., Monteiro, C., Evtyugina, M., and Pio, C., Summer 2009 wildfires in Portugal: Emission of trace gases and aerosol composition: Atmospheric Environment, 45, 641-649, doi:10.1016/j.atmosenv.2010.10.031, 2011b.
Alves, C. A., Goncalves, C., Pio, C. A., Mirante, F., Caseiro, A., Tarelho, L., Freitas, M. C., and Viegas, D. X., Smoke emissions from biomass burning in a Mediterranean shrubland: Atmospheric Environment, 44, 3024-3033, doi:10.1016/j.atmosenv.2010.05.010, 2010.
Alves, C. A., Vicente, A., Monteiro, C., Goncalves, C., Evtyugina, M., and Pio, C., Emission of trace gases and organic components in smoke particles from a wildfire in a mixed-evergreen forest in Portugal: Science of the Total Environment, 409, 1466-1475, doi:10.1016/j.scitotenv.2010.12.025, 2011c.
Anderson, B. E., Grant, W. B., Gregory, G. L., Browell, E. V., Collins, J. E., Jr., Sachse, G. W., Bagwell, D. R., Hudgins, C. H., Blake, D. R., and Blake, N. J., Aerosols from biomass burning over the tropical South Atlantic region: Distributions and impacts: J. Geophys. Res., 101, 24,117-24,138, 1996.
Andreae, M. O., Browell, E. V., Garstang, M., Gregory, G. L., Harriss, R. C., Hill, G. F., Jacob, D. J., Pereira, M. C., Sachse, G. W., Setzer, A. W., Dias, P. L. S., Talbot, R. W., Torres, A. L., and Wofsy, S. C., Biomass-burning emissions and associated haze layers over Amazonia: J. Geophys. Res., 93, 1509-1527, 1988.
Andreae, M. O., Atlas, E., Cachier, H., Cofer, W. R., III, Harris, G. W., Helas, G., Koppmann, R., Lacaux, J.-P., and Ward, D. E., Trace gas and aerosol emissions from savanna fires, in Biomass Burning and Global Change, edited by J. S. Levine, pp. 278-295, MIT Press, Cambridge, Mass., 1996a.
Andreae, M. O., Atlas, E., Harris, G. W., Helas, G., de Kock, A., Koppmann, R., Maenhaut, W., Manö, S., Pollock, W. H., Rudolph, J., Scharffe, D., Schebeske, G., and Welling, M., Methyl halide emissions from savanna fires in southern Africa: J. Geophys. Res., 101, 23,603-23,613, 1996b.
Andreae, M. O., Andreae, T. W., Annegarn, H., Beer, F., Cachier, H., Elbert, W., Harris, G. W., Maenhaut, W., Salma, I., Swap, R., Wienhold, F. G., and Zenker, T., Airborne studies of aerosol emissions from savanna fires in southern Africa: 2. Aerosol chemical composition: J. Geophys. Res., 103, 32,119-32,128, 1998.
Andreae, M. O., Artaxo, P., Beck, V., M. Bela, Gerbig, C., Longo, K., Munger, J. W., Wiedemann, K. T., and Wofsy, S. C., Carbon monoxide and related trace gases and aerosols over the Amazon Basin during the wet and dry seasons: Atmos. Chem. Phys., 12, 6041–6065, 2012.
Arai, H., Hosen, Y., Hong, V. N. P., Thi, N. T., Huu, C. N., and Inubushi, K., Greenhouse gas emissions from rice straw burning and straw-mushroom cultivation in a triple rice cropping system in the Mekong Delta: Soil Sci. Plant Nutr., 61, 719-735, doi:10.1080/00380768.2015.1041862, 2015.
Aurell, J., and Gullett, B. K., Emission factors from aerial and ground measurements of field and laboratory forest burns in the Southeastern US: PM2.5, black and brown carbon, VOC, and PCDD/PCDF: Environ. Sci. Technol., 47, 8443-8452, doi:10.1021/es402101k, 2013.
Aurell, J., Gullett, B. K., and Tabor, D., Emissions from southeastern US Grasslands and pine savannas: Comparison of aerial and ground field measurements with laboratory burns: Atmospheric Environment, 111, 170-178, doi:10.1016/j.atmosenv.2015.03.001, 2015.
Aurell, J., Gullett, B. K., Tabor, D., and Yonker, N., Emissions from prescribed burning of timber slash piles in Oregon: Atmospheric Environment, 150, 395-406, doi:10.1016/j.atmosenv.2016.11.034, 2017.
Babbitt, R. E., Ward, D. E., Susott, R. A., Artaxo, P., and Kauffman, J. B., A comparison of concurrent airborne and ground-based emissions generated from biomass burning in the Amazon basin, in SCAR-B Proceedings, edited by V. W. J. H. Kirchhoff, pp. 23-26, Transtec Editorial, Sao Jose dos Campos, Brazil, 1996.
Balachandran, S., Pachon, J. E., Lee, S., Oakes, M. M., Rastogi, N., Shi, W. Y., Tagaris, E., Yan, B., Davis, A., Zhang, X. L., Weber, R. J., Mulholland, J. A., Bergin, M. H., Zheng, M., and Russell, A. G., Particulate and gas sampling of prescribed fires in South Georgia, USA: Atmospheric Environment, 81, 125-135, doi:10.1016/j.atmosenv.2013.08.014, 2013.
Ballard-Tremeer, G., and Jawurek, H. H., Comparison of five rural, wood-burning cooking devices: Efficiencies and emissions: Biomass & Bioenergy, 11, 419-430, 1996.
Bertrand, A., Stefenelli, G., Bruns, E. A., Pieber, S. M., Temime-Roussel, B., Slowik, J. G., Prevot, A. S. H., Wortham, H., El Haddad, I., and Marchand, N., Primary emissions and secondary aerosol production potential from woodstoves for residential heating: Influence of the stove technology and combustion efficiency: Atmospheric Environment, 169, 65-79, doi:10.1016/j.atmosenv.2017.09.005, 2017.
Bertschi, I., Yokelson, R. J., Ward, D. E., Babbitt, R. E., Susott, R. A., Goode, J. G., and Hao, W. M., Trace gas and particle emissions from fires in large diameter and belowground biomass fuels: J. Geophys. Res., 108, 8472, doi:10.1029/2002JD002100, 2003a.
Bertschi, I. T., Yokelson, R. J., Ward, D. E., Christian, T. J., and Hao, W. M., Trace gas emissions from the production and use of domestic biofuels in Zambia measured by open-path Fourier transform infrared spectroscopy: J. Geophys. Res., 108, 8469, doi:10.1029/2002JD002158, 2003b.
Bhattacharya, S. C., Albina, D. O., and Abdul Salam, P., Emission factors of wood and charcoal-fired cookstoves: Biomass and Bioenergy, 23, 453-469, doi:10.1016/S0961-9534(02)00072-7, 2002.
Biswas, A., Blum, J. D., Klaue, B., and Keeler, G. J., Release of mercury from Rocky Mountain forest fires: Global Biogeochemical Cycles, 21, Gb1002, doi:10.1029/2006gb002696, 2007.
Biswas, A., Blum, J. D., and Keeler, G. J., Mercury storage in surface soils in a central Washington forest and estimated release during the 2001 Rex Creek Fire: Science of the Total Environment, 404, 129-138, doi:10.1016/j.scitotenv.2008.05.043, 2008.
Blake, D. R., Smith, T. W., Chen, T.-Y., Whipple, W. J., and Rowland, F. S., Effects of biomass burning on summertime nonmethane hydrocarbon concentrations in the Canadian wetlands: J. Geophys. Res., 99, 1699-1719, 1994.
Blake, N. J., Blake, D. R., Collins, J. E., Sachse, G. W., Anderson, B. E., Brass, J. A., Riggan, P. J., and Rowland, F. S., Biomass burning emissions of atmospheric methyl halide and hydrocarbon gases in the South Atlantic region, in Biomass Burning and Global Change, edited by J. S. Levine, pp. 575-594, MIT Press, Cambridge, Mass., 1996.
Bonsang, B., Lambert, G., and Boissard, C. C., Light hydrocarbons emissions from African savanna burnings, in Global Biomass Burning: Atmospheric, Climatic and Biospheric Implications, edited by J. S. Levine, pp. 155-161, MIT Press, Cambridge, Mass., 1991.
Bonsang, B., Boissard, C., Le Cloarec, M. F., Rudolph, J., and Lacaux, J. P., Methane, carbon monoxide and light non methane hydrocarbon emissions from African savanna burnings during the FOS/DECAFE experiment: J. Atmos. Chem., 22, 149-162, 1995.
Brocard, D., Lacaux, C., Lacaux, J. P., Kouadio, K., and Yoboué, V., Emissions from the combustion of biofuels in Western Africa, in Biomass Burning and Global Change, edited by J. S. Levine, pp. 350-360, MIT Press, Cambridge, Mass., 1996.
Brunke, E.-G., Labuschagne, C., and Slemr, F., Gaseous mercury emissions from a fire in the Cape Peninsula, South Africa, during January 2000: Geophys. Res. Lett., 28, 1483-1486, 2001.
Burling, I. R., Yokelson, R. J., Griffith, D. W. T., Johnson, T. J., Veres, P., Roberts, J. M., Warneke, C., Urbanski, S. P., Reardon, J., Weise, D. R., Hao, W. M., and de Gouw, J., Laboratory measurements of trace gas emissions from biomass burning of fuel types from the southeastern and southwestern United States: Atmos. Chem. Phys., 10, 11115-11130, doi:10.5194/acp-10-11115-2010, 2010.
Burling, I. R., Yokelson, R. J., Akagi, S. K., Urbanski, S. P., Wold, C. E., Griffith, D. W. T., Johnson, T. J., Reardon, J., and Weise, D. R., Airborne and ground-based measurements of the trace gases and particles emitted by prescribed fires in the United States: Atmos. Chem. Phys., 11, 12,197–12,216, doi:10.5194/acp-11-12197-2011, 2011.
Cachier, H., Liousse, C., Buat-Menard, P., and Gaudichet, A., Particulate content of savanna fire emissions: J. Atmos. Chem., 22, 123-148, 1995.
Cachier, H., Liousse, C., Pertuisot, M.-H., Gaudichet, A., Echalar, F., and Lacaux, J.-P., African fire particulate emission and atmospheric influence, in Biomass Burning and Global Change, edited by J. S. Levine, pp. 428-440, MIT Press, Cambridge, Mass., 1996.
Cao, G. L., Zhang, X. Y., and Zheng, F. C., Inventory of black carbon and organic carbon emissions from China: Atmospheric Environment, 40, 6516-6527, doi:10.1016/j.atmosenv.2006.05.070, 2006.
Cao, G. L., Zhang, X. Y., Gong, S. L., and Zheng, F. C., Investigation on emission factors of particulate matter and gaseous pollutants from crop residue burning: Journal of Environmental Sciences, 20, 50-55, doi:10.1016/s1001-0742(08)60007-8, 2008.
Cerqueira, M., Gomes, L., Tarelho, L., and Pio, C., Formaldehyde and acetaldehyde emissions from residential wood combustion in Portugal: Atmospheric Environment, 72, 171-176, doi:10.1016/j.atmosenv.2013.02.045, 2013.
Chen, L. W. A., Moosmuller, H., Arnott, W. P., Chow, J. C., Watson, J. G., Susott, R. A., Babbitt, R. E., Wold, C. E., Lincoln, E. N., and Hao, W. M., Emissions from laboratory combustion of wildland fuels: Emission factors and source profiles: Environ. Sci. Technol., 41, 4317-4325, doi:10.1021/es062364i, 2007.
Chen, Y. C., Shen, G. F., Liu, W. J., Du, W., Su, S., Duan, Y. H., Lin, N., Zhuo, S. J., Wang, X. L., Xing, B. S., and Tao, S., Field measurement and estimate of gaseous and particle pollutant emissions from cooking and space heating processes in rural households, northern China: Atmospheric Environment, 125, 265-271, doi:10.1016/j.atmosenv.2015.11.032, 2016.
Christian, T. J., Kleiss, B., Yokelson, R. J., Holzinger, R., Crutzen, P. J., Hao, W. M., Saharjo, B. H., and Ward, D. E., Comprehensive laboratory measurements of biomass-burning emissions: 1. Emissions from Indonesian, African, and other fuels: J. Geophys. Res., 108, 4719, doi:10.1029/2003JD003704, 2003.
Christian, T. J., Yokelson, R. J., Carvalho, J. A., Griffith, D. W. T., Alvarado, E. C., Santos, J. C., Neto, T. G. S., Veras, C. A. G., and Hao, W. M., The tropical forest and fire emissions experiment: Trace gases emitted by smoldering logs and dung from deforestation and pasture fires in Brazil: J. Geophys. Res., 112, D18308, doi:10.1029/2006JD008147, 2007.
Christian, T. J., Yokelson, R. J., Cárdenas, B., Molina, L. T., Engling, G., and Hsu, S.-C., Trace gas and particle emissons from domestic and industrial biofuel use and garbage burning in central Mexico: Atmos. Chem. Phys., 10, 565-584, 2010.
Ciccioli, P., Brancaleoni, E., Frattoni, M., Cecinato, A., and Pinciarelli, L., Determination of volatile organic compounds (VOC) emitted from biomass burning of Mediterranean vegetation species by GC-MS: Analytical Letters, 34, 937-955, 2001.
Cinnirella, S., and Pirrone, N., Spatial and temporal distributions of mercury emissions from forest fires in Mediterranean region and Russian federation: Atmospheric Environment, 40, 7346-7361, doi:10.1016/j.atmosenv.2006.06.051, 2006.
Cofer, W. R., III, Levine, J. S., Sebacher, D. I., Winstead, E. L., Riggan, P. J., Brass, J. A., and Ambrosia, V. G., Particulate emissions from a mid-latitude prescribed chaparral fire: J. Geophys. Res., 93, 5207-5212, 1988.
Cofer, W. R., III, Levine, J. S., Sebacher, D. I., Winstead, E. L., Riggan, P. J., Stocks, B. J., Brass, J. A., Ambrosia, V. G., and Boston, P. J., Trace gas emissions from chaparral and boreal forest fires: J. Geophys. Res., 94, 2255-2259, 1989.
Cofer, W. R., III, Levine, J. S., Winstead, E. L., LeBel, P. J., Koller, A. M., and Hinkle, C. R., Trace gas emissions from burning Florida wetlands: J. Geophys. Res., 95, 1865-1870, 1990a.
Cofer, W. R., III, Levine, J. S., Winstead, E. L., and Stocks, B. J., Gaseous emissions from Canadian boreal forest fires: Atmospheric Environment, 24A, 1653-1659, 1990b.
Cofer, W. R., III, Levine, J. S., Winstead, E. L., and Stocks, B. J., New estimates of nitrous oxide emissions from biomass burning: Nature, 349, 689-691, 1991.
Cofer, W. R., III, Levine, J. S., Winstead, E. L., Cahoon, D. R., Sebacher, D. I., Pinto, J. P., and Stocks, B. J., Source composition of trace gases released during African savanna fires: J. Geophys. Res., 101, 23,597-23,602, 1996a.
Cofer, W. R., III, Winstead, E. L., Stocks, B. J., Overbay, L. W., Goldammer, J. G., Cahoon, D. R., and Levine, J. S., Emissions from boreal forest fires: Are the atmospheric impacts underestimated?, in Biomass Burning and Global Change, edited by J. S. Levine, pp. 834-839, MIT Press, Cambridge, Mass., 1996b.
Cofer, W. R., III, Winstead, E. L., Stocks, B. J., Goldammer, J. G., and Cahoon, D. R., Crown fire emissions of CO2, CO, H2, CH4, and TNMHC from a dense jack pine boreal forest fire: Geophys. Res. Lett., 25, 3919-3922, 1998.
Coffey, E. R., Muvandimwe, D., Hagar, Y., Wiedinmyer, C., Kanyomse, E., Piedrahita, R., Dickinson, K. L., Oduro, A., and Hannigan, M. P., New emission factors and efficiencies from in-field measurements of traditional and improved cookstoves and their potential implications: Environ. Sci. Technol., 51, 12,508-12,517, doi:10.1021/acs.est.7b02436, 2017.
Collier, S., Zhou, S., Onasch, T. B., Jaffe, D. A., Kleinman, L., Sedlacek, A. J., Briggs, N. L., Hee, J., Fortner, E., Shilling, J. E., Worsnop, D., Yokelson, R. J., Parworth, C., Ge, X. L., Xu, J. Z., Butterfield, Z., Chand, D., Dubey, M. K., Pekour, M. S., Springston, S., and Zhang, Q., Regional influence of aerosol emissions from wildfires driven by combustion efficiency: Insights from the BB…
Crutzen, P. J., Heidt, L. E., Krasnec, J. P., Pollock, W. H., and Seiler, W., Biomass burning as a source of atmospheric gases CO, H2, N2O, NO, CH3Cl, and COS: Nature, 282, 253-256, 1979.
Cui, M., Chen, Y. J., Zheng, M., Li, J., Tang, J., Han, Y., Song, D. B., Yan, C. Q., Zhang, F., Tian, C. G., and Zhang, G., Emissions and characteristics of particulate matter from rainforest burning in the Southeast Asia: Atmospheric Environment, 191, 194-204, doi:10.1016/j.atmosenv.2018.07.062, 2018.
Dasch, J. M., Particulate and gaseous emissions from wood-burning fireplaces: Environ. Sci. Tech., 16, 639-645, 1982.
De Angelis, D. G., Ruffin, D. S., and Rezink, R. B., Preliminary Characterization of Emissions from Wood-Fired Residential Combustion Equipment. Washington, D.C.: US Environ. Protection Agency, 1980.
de Gouw, J. A., Warneke, C., Parrish, D. D., Holloway, J. S., Trainer, M., and Fehsenfeld, F. C., Emission sources and ocean uptake of acetonitrile (CH3CN) in the atmosphere: J. Geophys. Res., 108, 4329, doi:10.1029/2002JD002897, 2003.
de Gouw, J. A., Warneke, C., Stohl, A., Wollny, A. G., Brock, C. A., Cooper, O. R., Holloway, J. S., Trainer, M., and Fehsenfeld, F. C., The VOC composition of aged forest fire plumes from Alaska and western Canada, 52 p., 2005.
de la Sota, C., Viana, M., Kane, M., Youm, I., Masera, O., and Lumbreras, J., Quantification of carbonaceous aerosol emissions from cookstoves in Senegal: Aerosol and Air Quality Research, 19, 80-91, doi:10.4209/aaqr.2017.11.0540, 2019.
de Zarate, I. O., Ezcurra, A., Lacaux, J. P., and Van Dinh, P., Emission factor estimates of cereal waste burning in Spain: Atmospheric Environment, 34, 3183-3193, 2000.
Delmas, R., and Servant, J., The origins of sulfur compounds in the atmosphere of a zone of high productivity (Gulf of Guinea): J. Geophys. Res., 87, 11,019-11,026, 1982.
Delmas, R., Lacaux, J.-P., Menaut, J.-C., Abbadie, L., Le Roux, X., Helas, G., and Lobert, J., Nitrogen compound emission from biomass burning in tropical African savanna FOS/DECAFE 1991 Experiment (Lamto, Ivory Coast): J. Atmos. Chem., 22, 175-193, 1995a.
Delmas, R., Lacaux, J. P., and Brocard, D., Determination of biomass burning emission factors: Methods and results: Environmental Monitoring and Assessment, 38, 181-204, 1995b.
Delmas, R. A., Marenco, A., Tathy, J. P., Cros, B., and Baudet, J. G. R., Sources and sinks of methane in the African savanna. CH4 emissions from biomass burning: J. Geophys. Res., 96, 7287-7299, 1991.
Desservettaz, M., Paton-Walsh, C., Griffith, D. W. T., Kettlewell, G., Keywood, M. D., Vanderschoot, M. V., Ward, J., Mallet, M. D., Milic, A., Miljevic, B., Ristovski, Z. D., Howard, D., Edwards, G. C., and Atkinson, B., Emission factors of trace gases and particles from tropical savanna fires in Australia: J. Geophys. Res., 122, 6059-6074, doi:10.1002/2016JD025925, 2017.
Dhammapala, R., Claiborn, C., Simpson, C., and Jimenez, J., Emission factors from wheat and Kentucky bluegrass stubble burning: Comparison of field and simulated burn experiments: Atmospheric Environment, 41, 1512-1520, 2007.
Du, W., Shen, G. F., Chen, Y. C., Zhu, X., Zhuo, S. J., Zhong, Q. R., Qi, M., Xue, C. Y., Liu, G. Q., Zeng, E., Xing, B. S., and Tao, S., Comparison of air pollutant emissions and household air quality in rural homes using improved wood and coal stoves: Atmospheric Environment, 166, 215-223, doi:10.1016/j.atmosenv.2017.07.029, 2017.
Du, W., Zhu, X., Chen, Y. C., Liu, W. J., Wang, W., Shen, G. F., Tao, S., and Jetter, J. J., Field-based emission measurements of biomass burning in typical Chinese built-in-place stoves: Environmental Pollution, 242, 1587-1597, doi:10.1016/j.envpol.2018.07.121, 2018.
Eagan, R. C., Hobbs, P. V., and Radke, L. F., Measurements of cloud condensation nuclei and cloud droplet size distributions in the vicinity of forest fires: J. Appl. Meteor., 13, 553-557, 1974.
Ebinghaus, R., Slemr, F., Brenninkmeijer, C. A. M., van Velthoven, P., Zahn, A., Hermann, M., O'Sullivan, D. A., and Oram, D. E., Emissions of gaseous mercury from biomass burning in South America in 2005 observed during CARIBIC flights: Geophys. Res. Lett., 34, L08813, doi:10.1029/2006gl028866, 2007.
Echalar, F., Gaudichet, A., Cachier, H., and Artaxo, P., Aerosol emissions by tropical forest and savanna biomass burning: Characteristic trace elements and fluxes: Geophys. Res. Lett., 22, 3039-3042, 1995.
Edgerton, S. A., Khalil, M. A. K., and Rasmussen, R. A., Source emission characterization of residential wood-burning stoves and fireplaces: Fine particle/methyl chloride ratios for use in chemical mass balance modeling: Environ. Sci. Tech., 20, 803-807, 1986.
Eilenberg, S. R., Bilsback, K. R., Johnson, M., Kodros, J. K., Lipsky, E. M., Naluwagga, A., Fedak, K. M., Benka-Coker, M., Reynolds, B., Peel, J., Clark, M., Shan, M., Sambandam, S., L'Orange, C., Pierce, J. R., Subramanian, R., Volckens, J., and Robinson, A. L., Field measurements of solid-fuel cookstove emissions from uncontrolled cooking in China, Honduras, Uganda, and India: Atmospheric Envi…
Einfeld, W., Ward, D. E., and Hardy, C. C., Effects of fire behavior on prescribed fire smoke characteristics: A case study, in Global Biomass Burning: Atmospheric, Climatic, and Biospheric Implications, edited by J. S. Levine, pp. 412-419, MIT Press, Cambridge, Mass., 1991.
Engle, M. A., Gustin, M. S., Johnson, D. W., Murphy, J. F., Miller, W. W., Walker, R. F., Wright, J., and Markee, M., Mercury distribution in two Sierran forest and one desert sagebrush steppe ecosystems and the effects of fire: Science of the Total Environment, 367, 222-233, doi:10.1016/h.scitotenv.2005.11.025, 2006.
Evtyugina, M., Calvo, A. I., Nunes, T., Alves, C., Fernandes, A. P., Tarelho, L., Vicente, A., and Pio, C., VOC emissions of smouldering combustion from Mediterranean wildfires in central Portugal: Atmospheric Environment, 64, 339-348, doi:10.1016/j.atmosenv.2012.10.001, 2013.
Evtyugina, M., Alves, C., Calvo, A., Nunes, T., Tarelho, L., Duarte, M., Prozil, S. O., Evtuguin, D. V., and Pio, C., VOC emissions from residential combustion of Southern and mid-European woods: Atmospheric Environment, 83, 90-98, doi:http://dx.doi.org/10.1016/j.atmosenv.2013.10.050, 2014.
Ezcurra, A. T., de Zarate, I. O., Lacaux, J.-P., and Dinh, P.-V., Atmospheric impact of cereal—waste burning in Spain, in Biomass Burning and Global Change, vol. 2, Biomass Burning in South America, Southeast Asia, and Temperate and Boreal Ecosystems, and the Oil Fires of Kuwait, edited by J. S. Levine, pp. 780– 786, MIT Press, Cambridge, Mass., 1996.
Fang, Z., Deng, W., Zhang, Y., Ding, X., Tang, M., Liu, T., Hu, Q., Zhu, M., Wang, Z., Yang, W., Huang, Z., Song, W., Bi, X., Chen, J., Sun, Y., George, C., and Wang, X., Open burning of rice, corn and wheat straws: primary emissions, photochemical aging, and secondary organic aerosol formation: Atmos. Chem. Phys., 17, 14821-14839, doi:10.5194/acp-17-14821-2017, 2017.
Ferek, R. J., Reid, J. S., Hobbs, P. V., Blake, D. R., and Liousse, C., Emission factors of hydrocarbons, halocarbons, trace gases and particles from biomass burning in Brazil: J. Geophys. Res., 103, 32,107-32,118, 1998.
Fine, P. M., Cass, G. R., and Simoneit, B. R. T., Chemical characterization of fine particle emissions from fireplace combustion of woods grown in the northeastern United States: Environ. Sci. Technol., 35, 2665-2675, 2001.
Fine, P. M., Cass, G. R., and Simoneit, B. R. T., Organic compounds in biomass smoke from residential wood combustion: Emissions characterization at a continental scale: J. Geophys. Res., 107, 8349, doi:10.1029/2001JD000661, 2002a.
Fine, P. M., Cass, G. R., and Simoneit, B. R. T., Chemical characterization of fine particle emissions from the fireplace combustion of woods grown in the southern United States: Environ. Sci. Technol., 36, 1442-1451, 2002b.
Fine, P. M., Cass, G. R., and Simoneit, B. R. T., Chemical characterization of fine particle emissions from the wood stove combustion of prevalent United States tree species: Environmental Engineering Science, 21, 705-721, 2004.
FIRESCAN Science Team, Fire in Ecosystems of Boreal Eurasia: The Bor Forest Island Fire Experiment Fire Research Campaign Asia-North (FIRESCAN), in Biomass Burning and Global Change, edited by J. S. Levine, pp. 848-873, MIT Press, Cambridge, Mass., 1996.
Franca, D. D., Longo, K. M., Neto, T. G. S., Santos, J. C., Freitas, S. R., Rudorff, B. F. T., Cortez, E. V., Anselmo, E., and Carvalho, J. A., Pre-Harvest sugarcane burning: Determination of emission factors through laboratory measurements: Atmosphere, 3, 164-180, doi:10.3390/atmos3010164, 2012.
Friedli, H. R., Atlas, E., Stroud, V. R., Giovanni, L., Campos, T., and Radke, L. F., Volatile organic trace gases emitted from North American wildfires: Global Biogeochemical Cycles, 15, 435-452, 2001a.
Friedli, H. R., Radke, L. F., and Lu, J. Y., Mercury in smoke from biomass fires: Geophys. Res. Lett., 28, 3223-3226, 2001b.
Friedli, H. R., Radke, L. F., Lu, J. Y., Banic, C. M., Leaitch, W. R., and MacPherson, J. I., Mercury emissions from burning of biomass from temperate North American forests: laboratory and airborne measurements: Atmospheric Environment, 37, 253-267, 2003a.
Friedli, H. R., Radke, L. F., Prescott, R., Hobbs, P. V., and Sinha, P., Mercury emissions from the August 2001 wildfires in Washington State and an agricultural waste fire in Oregon and atmospheric mercury budget estimates: Global Biogeochemical Cycles, 17, 1039, doi:10.1029/2002GB001972, 2003b.
Friedli, H. R., Arellano, A. F., Cinnirella, S., and Pirrone, N., Mercury Emissions from Global Biomass Burning: Spatial and Temporal Distribution, in Mercury Fate and Transport in the Global Atmosphere: Emissions, Measurements and Models, edited by N. Pirrone & R. Mason, pp. 193-220, 2009.
Gadi, R., Kulshrestha, U. C., Sarkar, A. K., Garg, S. C., and Parashar, D. C., Emissions of SO2 and NOx from biofuels in India: Tellus Series B-Chemical and Physical Meteorology, 55, 787-795, doi:10.1034/j.1600-0889.2003.00065.x, 2003.
Gaudichet, A., Echalar, F., Chatenet, B., Quisefit, J. P., Malingre, G., Cachier, H., Buat-Ménard, P., Artaxo, P., and Maenhaut, W., Trace elements in tropical African savanna biomass burning aerosols: J. Atmos. Chem., 22, 19-39, 1995.
Geron, C., and Hays, M., Air emissions from organic soil burning on the coastal plain of North Carolina: Atmospheric Environment, 64, 192-199, doi:10.1016/j.atmosenv.2012.09.065, 2013.
Gonçalves, C., Alves, C., Evtyugina, M., Mirante, F., Pio, C., Caseiro, A., Schmidl, C., Bauer, H., and Carvalho, F., Characterisation of PM10 emissions from woodstove combustion of common woods grown in Portugal: Atmospheric Environment, 44, 4474-4480, doi:10.1016/j.atmosenv.2010.07.026, 2010.
Gonçalves, C., Alves, C., and Pio, C., Inventory of fine particulate organic compound emissions from residential wood combustion in Portugal: Atmospheric Environment, 50, 297-306, doi:10.1016/j.atmosenv.2011.12.013, 2012.
Goode, J. G., Yokelson, R. J., Susott, R. A., and Ward, D. E., Trace gas emissions from laboratory biomass fires measured by open-path Fourier transform infrared spectroscopy: Fires in grass and surface fuels: J. Geophys. Res., 104, 21,237-21,245, 1999.
Goode, J. G., Yokelson, R. J., Ward, D. E., Susott, R. A., Babbitt, R. E., Davies, M. A., and Hao, W.-M., Measurements of excess O3, CO2, CO, CH4, C2H4, C2H2, HCN, NO, NH3, HCOOH, CH3COOH, HCHO, and CH3OH in 1997 Alaskan biomass burning plumes by airborne Fourier transform infrared spectroscopy (AFTIR): J. Geophys. Res., 105, 22,147-22,166, 2000.
Graham, B., Mayol-Bracero, O. L., Guyon, P., Roberts, G. C., Decesari, S., Facchini, M. C., Artaxo, P., Maenhaut, W., Köll, P., and Andreae, M. O., Water-soluble organic compounds in biomass burning aerosols over Amazonia: 1. Characterization by NMR and GC-MS: J. Geophys. Res., 107, 8047, doi:10.1029/2001JD000336, 2002.
Greenberg, J. P., Zimmerman, P. R., Heidt, L., and Pollock, W., Hydrocarbon and carbon monoxide emissions from biomass burning in Brazil: J. Geophys. Res., 89, 1350-1354, 1984.
Griffith, D. W. T., Mankin, W. G., Coffey, M. T., Ward, D. E., and Riebau, A., FTIR remote sensing of biomass burning emissions of CO2, CO, CH4, CH2O, NO, NO2, NH3, and N2O, in Global Biomass Burning: Atmospheric, Climatic and Biospheric Implications, edited by J. S. Levine, pp. 230-239, MIT Press, Cambridge, Mass., 1991.
Guérette, E. A., Paton-Walsh, C., Desservettaz, M., Smith, T. E. L., Volkova, L., Weston, C. J., and Meyer, C. P., Emissions of trace gases from Australian temperate forest fires: emission factors and dependence on modified combustion efficiency: Atmos. Chem. Phys., 18, 3717-3735, doi:10.5194/acp-18-3717-2018, 2018.
Guyon, P., Frank, G. P., Welling, M., Chand, D., Artaxo, P., Rizzo, L., Nishioka, G., Kolle, O., Fritsch, H., Silva Dias, M. A. F., Gatti, L. V., Cordova, A. M., and Andreae, M. O., Airborne measurements of trace gases and aerosol particle emissions from biomass burning in Amazonia: Atmos. Chem. Phys., 5, 2989–3002, 2005.
Habib, G., Venkataraman, C., Shrivastava, M., Banerjee, R., Stehr, J. W., and Dickerson, R. R., A new methodology for estimating biofuel consumption for cooking: Atmospheric emissions of black carbon and sulfur dioxide from India: Global Biogeochemical Cycles, 18, GB3007, doi:10.1029/2003GB002157, 2004.
Habib, G., Venkataraman, C., Bond, T. C., and Schauer, J. J., Chemical, microphysical and optical properties of primary particles from the combustion of biomass fuels: Environ. Sci. Technol., 42, 8829-8834, 2008.
Hall, D., Wu, C. Y., Hsu, Y. M., Stormer, J., Engling, G., Capeto, K., Wang, J., Brown, S., Li, H. W., and Yu, K. M., PAHs, carbonyls, VOCs and PM2.5 emission factors for pre-harvest burning of Florida sugarcane: Atmospheric Environment, 55, 164-172, doi:10.1016/j.atmosenv.2012.03.034, 2012.
Hamada, Y., Darung, U., Limin, S. H., and Hatano, R., Characteristics of fire-generated gas emission observed during a large peatland fire in 2009 at Kalimantan, Indonesia: Atmospheric Environment, 74, 177-181, doi:10.1016/j.atmosenv2013.03.058, 2013.
Hao, W.-M., and Ward, D. E., Methane production from global biomass burning: J. Geophys. Res., 98, 20,657-20,661, 1993.
Hao, W.-M., Ward, D. E., Olbu, G., and Baker, S. P., Emissions of CO2, CO and hydrocarbons from fires in diverse African savanna ecosystems: J. Geophys. Res., 101, 23,577-23,584, 1996a.
Hao, W. M., Ward, D. E., Olbu, G., Baker, S. P., and Plummer, J. R., Emissions of trace gases from fallow forests and woodland savannas in Zambia, in Biomass Burning and Global Change, edited by J. S. Levine, pp. 361-369, MIT Press, Cambridge, Mass., 1996b.
Hao, W. M., and Babbitt, R. E., Smoke production from residual combustion. Final Report 98-1-9-01, Joint Fire Science Program, 25 p. (2007).
Harden, J. W., Neff, J. C., Sandberg, D. V., Turetsky, M. R., Ottmar, R., Gleixner, G., Fries, T. L., and Manies, K. L., Chemistry of burning the forest floor during the FROSTFIRE experimental burn, interior Alaska, 1999: Global Biogeochemical Cycles, 18, GB3014, doi:10.1029/2003gb002194, 2004.
Hartmann, W. (1990). Carbonsäuren in der Atmosphäre, Ph. D. Thesis, Universität Mainz.
Hatch, L. E., Luo, W., Pankow, J. F., Yokelson, R. J., Stockwell, C. E., and Barsanti, K. C., Identification and quantification of gaseous organic compounds emitted from biomass burning using two-dimensional gas chromatography–time-of-flight mass spectrometry: Atmos. Chem. Phys., 15, 1865-1899, doi:10.5194/acp-15-1865-2015, 2015.
Haumann, F. A., Batenburg, A. M., Pieterse, G., Gerbig, C., Krol, M. C., and Röckmann, T., Emission ratio and isotopic signatures of molecular hydrogen emissions from tropical biomass burning: Atmos. Chem. Phys., 13, 9401-9413, doi:10.5194/acp-13-9401-2013, 2013.
Hayashi, K., Ono, K., Kajiura, M., Sudo, S., Yonemura, S., Fushimi, A., Saitoh, K., Fujitani, Y., and Tanabe, K., Trace gas and particle emissions from open burning of three cereal crop residues: Increase in residue moistness enhances emissions of carbon monoxide, methane, and particulate organic carbon: Atmospheric Environment, 95, 36-44, doi:10.1016/j.atmosenv.2014.06.023, 2014.
Hays, M. D., Geron, C. D., Linna, K. J., Smith, N. D., and Schauer, J. J., Speciation of gas-phase and fine particle emissions from burning of foliar fuels: Environ. Sci. Technol., 36, 2281-2295, 2002.
Hays, M. D., Fine, P. M., Geron, C. D., Kleeman, M. J., and Gullett, B. K., Open burning of agricultural biomass: Physical and chemical properties of particle-phase emissions: Atmospheric Environment, 39, 6747-6764, 2005.
Hedberg, E., Kristensson, A., Ohlsson, M., Johansson, C., Johansson, P.-A., Swietlicki, E., Vesely, V., Widequist, U., and Westerholm, R., Chemical and physical characterization of emissions from birch wood combustion in a wood stove: Atmospheric Environment, 36, 4823-4837, 2002.
Hegg, D. A., Radke, L. F., Hobbs, P. V., Rasmussen, R. A., and Riggan, P. J., Emissions of some trace gases from biomass fires: J. Geophys. Res., 95, 5669-5675, 1990.
Helas, G., Lobert, J., Scharffe, D., Schäfer, L., Goldammer, J., Baudet, J., Ajavon, A.-L., Ahoua, B., Lacaux, J.-P., Delmas, R., and Andreae, M. O., Airborne measurements of savanna fire emissions and the regional distribution of pyrogenic pollutants over western Africa: J. Atmos. Chem., 22, 217-239, 1995.
Hildemann, L. M., Markowski, G. R., and Cass, G. R., Chemical composition of emissions from urban sources of fine organic aerosol: Environ. Sci. Technol., 25, 744-759, 1991.
Hobbs, P. V., Reid, J. S., Herring, J. A., Nance, J. D., Weiss, R. E., Ross, J. L., Hegg, D. A., Ottmar, R. D., and Liousse, C., Particle and trace-gas measurements in the smoke from prescribed burns of forest products in the Pacific Northwest, in Biomass Burning and Global Change, edited by J. S. Levine, pp. 697-715, MIT Press, Cambridge, Mass., 1996.
Hodgson, A. K., Morgan, W. T., O'Shea, S., Bauguitte, S., Allan, J. D., Darbyshire, E., Flynn, M. J., Liu, D., Lee, J., Johnson, B., Haywood, J. M., Longo, K. M., Artaxo, P. E., and Coe, H., Near-field emission profiling of tropical forest and Cerrado fires in Brazil during SAMBBA 2012: Atmos. Chem. Phys., 18, 5619-5638, doi:10.5194/acp-18-5619-2018, 2018.
Holder, A. L., Hagler, G. S. W., Aurell, J., Hays, M. D., and Gullett, B. K., Particulate matter and black carbon optical properties and emission factors from prescribed fires in the southeastern United States: J. Geophys. Res., 121, 3465-3483, doi:10.1002/2015JD024321, 2016.
Holder, A. L., Gullett, B. K., Urbanski, S. P., Elleman, R., O'Neill, S., Tabor, D., Mitchell, W. V., and Baker, K. R., Emissions from prescribed burning of agricultural fields in the Pacific Northwest: Atmospheric Environment, 166, 22-33, doi:http://dx.doi.org/10.1016/j.atmosenv.2017.06.043, 2017.
Holzinger, R. (1998). Zeitlich hoch aufgelöste Konzentrationen von volatilen organischen Komponenten in der unteren Troposphäre sowie Quantifizierung der Emissionen aus Biomasseverbrennnung in den Tropen. Ph. D. Thesis, Innsbruck, Austria, 196 p.
Holzinger, R., Warneke, C., Hansel, A., Jordan, A., Lindinger, W., Scharffe, D. H., Schade, G., and Crutzen, P. J., Biomass burning as a source of formaldehyde, acetaldehyde, methanol, acetone, acetonitrile, and hydrogen cyanide: Geophys. Res. Lett., 26, 1161-1164, 1999.
Hornbrook, R. S., Blake, D. R., Diskin, G. S., Fried, A., Fuelberg, H. E., Meinardi, S., Mikoviny, T., Richter, D., Sachse, G. W., Vay, S. A., Walega, J., Weibring, P., Weinheimer, A. J., Wiedinmyer, C., Wisthaler, A., Hills, A., Riemer, D. D., and Apel, E. C., Observations of nonmethane organic compounds during ARCTAS - Part 1: Biomass burning emissions and plume enhancements: Atmos. Chem. Phys.…
Hosseini, S., Urbanski, S. P., Dixit, P., Qi, L., Burling, I. R., Yokelson, R. J., Johnson, T. J., Shrivastava, M., Jung, H. S., Weise, D. R., Miller, J. W., and Cocker, D. R., Laboratory characterization of PM emissions from combustion of wildland biomass fuels: J. Geophys. Res., 118, 9914-9929, doi:10.1002/jgrd.50481, 2013.
Howard, D., Macsween, K., Edwards, G. C., Desservettaz, M., Guérette, E.-A., Paton-Walsh, C., Surawski, N. C., Sullivan, A. L., Weston, C., Volkova, L., Powell, J., Keywood, M. D., Reisen, F., and Meyer, C. P., Investigation of mercury emissions from burning of Australian eucalypt forest surface fuels using a combustion wind tunnel and field observations: Atmospheric Environment, 202, 17-27, doi:…
Huang, H.-L., Lee, W.-M. G., and Wu, F.-S., Emissions of air pollutants from indoor charcoal barbecue: Journal of Hazardous Materials, 302, 198-207, doi:10.1016/j.jhazmat.2015.09.048, 2016.
Huang, X., Li, M. M., Friedli, H. R., Song, Y., Chang, D., and Zhu, L., Mercury emissions from biomass burning in China: Environ. Sci. Technol., 45, 9442-9448, doi:10.1021/es202224e, 2011.
Huijnen, V., Wooster, M. J., Kaiser, J. W., Gaveau, D. L. A., Flemming, J., Parrington, M., Inness, A., Murdiyarso, D., Main, B., and van Weele, M., Fire carbon emissions over maritime southeast Asia in 2015 largest since 1997: Scientific Reports, 6, 26886, doi:10.1038/srep26886, 2016.
Hurst, D. F., Griffith, D. W. T., Carras, J. N., Williams, D. J., and Fraser, P. J., Measurements of trace gases emitted by Australian savanna fires during the 1990 dry season: J. Atmos. Chem., 18, 33-56, 1994a.
Hurst, D. F., Griffith, D. W. T., and Cook, G. D., Trace gas emissions from biomass burning in tropical Australian savannas: J. Geophys. Res., 99, 16,441-16,456, 1994b.
Hurst, D. F., Griffith, D. W. T., and Cook, G. D., Trace-gas emissions from biomass burning in Australia, in Biomass Burning and Global Change, edited by J. S. Levine, pp. 787-792, MIT Press, Cambridge, Mass., 1996.
Inomata, S., Tanimoto, H., Pan, X., Taketani, F., Komazaki, Y., Miyakawa, T., Kanaya, Y., and Wang, Z., Laboratory measurements of emission factors of nonmethane volatile organic compounds from burning of Chinese crop residues: J. Geophys. Res., 120, 5237-5252, doi:10.1002/2014JD022761, 2015.
Irfan, M., Riaz, M., Arif, M. S., Shahzad, S. M., Saleem, F., Naveed ur, R., van den Berg, L., and Abbas, F., Estimation and characterization of gaseous pollutant emissions from agricultural crop residue combustion in industrial and household sectors of Pakistan: Atmospheric Environment, 84, 189-197, doi:10.1016/j.atmosenv.2013.11.046, 2014.
Jayarathne, T., Stockwell, C. E., Bhave, P. V., Praveen, P. S., Rathnayake, C. M., Islam, M. R., Panday, A. K., Adhikari, S., Maharjan, R., Goetz, J. D., DeCarlo, P. F., Saikawa, E., Yokelson, R. J., and Stone, E. A., Nepal Ambient Monitoring and Source Testing Experiment (NAMaSTE): emissions of particulate matter from wood- and dung-fueled cooking fires, garbage and crop residue burning, brick k…
Jayarathne, T., Stockwell, C. E., Gilbert, A. A., Daugherty, K., Cochrane, M. A., Ryan, K. C., Putra, E. I., Saharjo, B. H., Nurhayati, A. D., Albar, I., Yokelson, R. J., and Stone, E. A., Chemical characterization of fine particulate matter emitted by peat fires in Central Kalimantan, Indonesia, during the 2015 El Niño: Atmos. Chem. Phys., 18, 2585-2600, doi:10.5194/acp-18-2585-2018, 2018b.
Jenkins, B. M., Jones, A. D., Turn, S. Q., and Williams, R. B., Emission factors for polycyclic aromatic hydrocarbons from biomass burning: Environ. Sci. Technol., 30, 2462-2469, 1996.
Johnson, B. T., Osborne, S. R., Haywood, J. M., and Harrison, M. A. J., Aircraft measurements of biomass burning aerosol over West Africa during DABEX: J. Geophys. Res., 113, D00c06, doi:10.1029/2007jd009451, 2008a.
Johnson, M., Edwards, R., Frenk, C. A., and Masera, O., In-field greenhouse gas emissions from cookstoves in rural Mexican households: Atmospheric Environment, 42, 1206-1222, doi:10.1016/j.atmosenv.2007.10.034, 2008b.
Joshi, V., Biomass burning in India, in Global Biomass Burning: Atmospheric, Climatic, and Biospheric Implications, edited by J. S. Levine, pp. 185-193, MIT Press, Cambridge, Mass., 1991.
Jost, C. (2002). Applications of atmospheric pressure chemical ionization mass spectrometry: Emissions from biomass burning and distribution of sulfur dioxide over northern Europe, Ph.D. Thesis, Universität Heidelberg,.
Keene, W. C., Lobert, R. M., Crutzen, P. J., Maben, J. R., Scharffe, D. H., Landmann, T., Hely, C., and Brain, C., Emissions of major gaseous and particulate species during experimental burns of southern African biomass: J. Geophys. Res., 111, D04301, doi:10.1029/2005JD006319, 2006.
Keshtkar, H., and Ashbaugh, L. L., Size distribution of polycyclic aromatic hydrocarbon particulate emission factors from agricultural burning: Atmospheric Environment, 41, 2729-2739, doi:10.1016/j.atmosenv.2006.11.043, 2007.
Kim Oanh, N. T., Ly, B. T., Tipayarom, D., Manandhar, B. R., Prapat, P., Simpson, C. D., and Liu, L. J. S., Characterization of particulate matter emission from open burning of rice straw: Atmospheric Environment, 45, 493-502, doi:10.1016/j.atmosenv.2010.09.023, 2011.
Kim Oanh, N. T., Tipayarom, A., Bich, T. L., Tipayarom, D., Simpson, C. D., Hardie, D., and Sally Liu, L. J., Characterization of gaseous and semi-volatile organic compounds emitted from field burning of rice straw: Atmospheric Environment, 119, 182-191, doi:http://dx.doi.org/10.1016/j.atmosenv.2015.08.005, 2015.
Kituyi, E., Marufu, L., Wandiga, S. O., Jumba, I. O., Andreae, M. O., and Helas, G., Carbon monoxide and nitric oxide from biofuel fires in Kenya: Energy Conversion and Management, 42, 1517-1542, 2001.
Koppmann, R., Khedim, A., Rudolph, J., Helas, G., Welling, M., and Zenker, T., Airborne measurements of organic trace gases from savanna fires in southern Africa during SAFARI-92, in Biomass Burning and Global Change, edited by J. S. Levine, pp. 309-319, MIT Press, Cambridge, Mass., 1996.
Korontzi, S., Ward, D. E., Susott, R. A., Yokelson, R. J., Justice, C. O., Hobbs, P. V., Smithwick, E. A. H., and Hao, W. M., Seasonal variation and ecosystem dependence of emission factors for selected trace gases and PM2.5 for southern African savanna fires: J. Geophys. Res., 108, 4758, doi:10.1029/2003JD003730, 2003.
Koss, A. R., Sekimoto, K., Gilman, J. B., Selimovic, V., Coggon, M. M., Zarzana, K. J., Yuan, B., Lerner, B. M., Brown, S. S., Jimenez, J. L., Krechmer, J., Roberts, J. M., Warneke, C., Yokelson, R. J., and de Gouw, J., Non-methane organic gas emissions from biomass burning: identification, quantification, and emission factors from PTR-ToF during the FIREX 2016 laboratory experiment: Atmos. Chem.…
Kudo, S., Tanimoto, H., Inomata, S., Saito, S., Pan, X. L., Kanaya, Y., Taketani, F., Wang, Z. F., Chen, H. Y., Dong, H. B., Zhang, M. G., and Yamaji, K., Emissions of nonmethane volatile organic compounds from open crop residue burning in the Yangtze River Delta region, China: J. Geophys. Res., 119, 7684-7698, doi:10.1002/2013jd021044, 2014.
Kuhlbusch, T. A., Lobert, J. M., Crutzen, P. J., and Warneck, P., Molecular nitrogen emissions from denitrification during biomass burning: Nature, 351, 135-137, 1991.
Lacaux, J.-P., Cachier, H., and Delmas, R., Biomass burning in Africa: An overview of its impact on atmospheric chemistry, in Fire in the Environment: The Ecological, Atmospheric, and Climatic Importance of Vegetation Fires, edited by P. J. Crutzen & J. G. Goldammer, pp. 159-191, J. Wiley & Sons, Chichester, England, 1993.
Lacaux, J.-P., Delmas, R., Jambert, C., and Kuhlbusch, T. A. J., NOx emissions from African savanna fires: J. Geophys. Res., 101, 23,585-23,596, 1996.
Lacaux, J. P., Brustet, J. M., Delmas, R., Menaut, J. C., Abbadie, L., Bonsang, B., Cachier, H., Baudet, J., Andreae, M. O., and Helas, G., Biomass burning in the tropical savannas of Ivory Coast: An overview of the field experiment Fire Of Savannas (FOS/DECAFE '91): J. Atmos. Chem., 22, 195-216, 1995.
Landis, M. S., Edgerton, E. S., White, E. M., Wentworth, G. R., Sullivan, A. P., and Dillner, A. M., The impact of the 2016 Fort McMurray Horse River Wildfire on ambient air pollution levels in the Athabasca Oil Sands Region, Alberta, Canada: Science of The Total Environment, 618, 1665-1676, doi:10.1016/j.scitotenv.2017.10.008, 2018.
Laursen, K. K., Hobbs, P. V., Radke, L. F., and Rasmussen, R. A., Some trace gas emissions from north American biomass fires with an assessment of regional and global fluxes from biomass burning: J. Geophys. Res., 97, 20,687-20,701, 1992.
Lawson, S. J., Keywood, M. D., Galbally, I. E., Gras, J. L., Cainey, J. M., Cope, M. E., Krummel, P. B., Fraser, P. J., Steele, L. P., Bentley, S. T., Meyer, C. P., Ristovski, Z., and Goldstein, A. H., Biomass burning emissions of trace gases and particles in marine air at Cape Grim, Tasmania: Atmos. Chem. Phys., 15, 13,393-13,411, doi:10.5194/acp-15-13393-2015, 2015.
Le Breton, M., Bacak, A., Muller, J. B. A., O'Shea, S. J., Xiao, P., Ashfold, M. N. R., Cooke, M. C., Batt, R., Shallcross, D. E., Oram, D. E., Forster, G., Bauguitte, S. J. B., and Percival, C. J., Airborne hydrogen cyanide measurements using a chemical ionisation mass spectrometer for the plume identification of biomass burning forest fires: Atmos. Chem. Phys., 13, 9217-9232, doi:10.5194/acp-13…
Le Canut, P., Andreae, M. O., Harris, G. W., Wienhold, F. G., and Zenker, T., Airborne studies of emissions from savanna fires in southern Africa, 1, Aerosol emissions measured with a laser optical particle counter: J. Geophys. Res., 101, 23,615-23,630, 1996.
Lee, M., Heikes, B. G., Jacob, D. J., Sachse, G., and Anderson, B., Hydrogen peroxide, organic hydroperoxides, and formaldehyde as primary pollutants from biomass burning: J. Geophys. Res., 102, 1301-1309, 1997.
Lee, S., Baumann, K., Schauer, J. J., Sheesley, R. J., Naeher, L. P., Meinardi, S., Blake, D. R., Edgerton, E. S., Russell, A. G., and Clements, M., Gaseous and particulate emissions from prescribed burning in Georgia: Environ. Sci. Technol., 39, 9049-9056, doi:10.1021/es0515831, 2005.
Lefer, B. L., Talbot, R. W., Harriss, R. C., Bradshaw, J. D., Sandholm, S. T., Olson, J. O., Sachse, G. W., Collins, J., Shipham, M. A., Blake, D. R., Klemm, K. I., Klemm, O., Gorzelska, K., and Barrick, J., Enhancement of acidic gases in biomass burning impacted air masses over Canada: J. Geophys. Res., 99, 1721-1737, 1994.
Lewis, A. C., Evans, M. J., Hopkins, J. R., Punjabi, S., Read, K. A., Purvis, R. M., Andrews, S. J., Moller, S. J., Carpenter, L. J., Lee, J. D., Rickard, A. R., Palmer, P. I., and Parrington, M., The influence of biomass burning on the global distribution of selected non-methane organic compounds: Atmos. Chem. Phys., 13, 851-867, doi:10.5194/acp-13-851-2013, 2013.
Li, C. L., Hu, Y. J., Zhang, F., Chen, J. M., Ma, Z., Ye, X. N., Yang, X., Wang, L., Tang, X. F., Zhang, R. H., Mu, M., Wang, G. H., Kan, H. D., Wang, X. M., and Mellouki, A., Multi-pollutant emissions from the burning of major agricultural residues in China and the related health-economic effects: Atmos. Chem. Phys., 17, 4957-4988, doi:10.5194/acp-17-4957-2017, 2017.
Li, X. G., Wang, S. X., Duan, L., Hao, J., Li, C., Chen, Y. S., and Yang, L., Particulate and trace gas emissions from open burning of wheat straw and corn stover in China: Environ. Sci. Technol., 41, 6052-6058, doi:10.1021/es0705137, 2007.
Li, X. H., Wang, S. X., Duan, L., and Hao, J. M., Characterization of non-methane hydrocarbons emitted from open burning of wheat straw and corn stover in China: Environmental Research Letters, 4, 044015, doi:10.1088/1748-9326/4/4/044015, 2009a.
Li, X. H., Wang, S. X., Duan, L., Hao, J. M., and Nie, Y. F., Carbonaceous aerosol emissions from household biofuel combustion in China: Environ. Sci. Technol., 43, 6076-6081, doi:10.1021/es803330j, 2009b.
Liley, J. B., Baumgardner, D., Kondo, Y., Kita, K., Blake, B. R., Koike, M., Machida, T., Takegawa, N., Kawakami, S., Shirai, T., and Ogawa, T., Black carbon in aerosol during BIBLE B: J. Geophys. Res., 108, 8399, doi:10.1029/2001JD000845, 2003.
Liousse, C., Penner, J. E., Walton, J. J., Eddleman, H., Chuang, C., and Cachier, H., Modeling biomass burning aerosols, in Biomass Burning and Global Change, edited by J. S. Levine, pp. 492-508, MIT Press, Cambridge, Mass., 1996.
Liu, X., Zhang, Y., Huey, L. G., Yokelson, R. J., Wang, Y., Jimenez, J. L., Campuzano-Jost, P., Beyersdorf, A. J., Blake, D. R., Choi, Y., St. Clair, J. M., Crounse, J. D., Day, D. A., Diskin, G. S., Fried, A., Hall, S. R., Hanisco, T. F., King, L. E., Meinardi, S., Mikoviny, T., Palm, B. B., Peischl, J., Perring, A. E., Pollack, I. B., Ryerson, T. B., Sachse, G., Schwarz, J. P., Simpson, I. J., …
Liu, X., Huey, L. G., Yokelson, R. J., Selimovic, V., Simpson, I. J., Müller, M., Jimenez, J. L., Campuzano-Jost, P., Beyersdorf, A. J., Blake, D. R., Butterfield, Z., Choi, Y., Crounse, J. D., Day, D. A., Diskin, G. S., Dubey, M. K., Fortner, E., Hanisco, T. F., Hu, W., King, L. E., Kleinman, L., Meinardi, S., Mikoviny, T., Onasch, T. B., Palm, B. B., Peischl, J., Pollack, I. B., Ryerson, T. B.,…
Lobert, J. M., Scharffe, D. H., Hao, W.-M., and Crutzen, P. J., Importance of biomass burning in the atmospheric budgets of nitrogen- containing gases: Nature, 346, 552-554, 1990.
Lobert, J. M., Scharffe, D. H., Hao, W.-M., Kuhlbusch, T. A., Seuwen, R., Warneck, P., and Crutzen, P. J., Experimental evaluation of biomass burning emissions: Nitrogen and carbon containing compounds, in Global Biomass Burning: Atmospheric, Climatic and Biospheric Implications, edited by J. S. Levine, pp. 289-304, MIT Press, Cambridge, Mass., 1991.
Ludwig, J., Marufu, L. T., Huber, B., Andreae, M. O., and Helas, G., Domestic combustion of biomass fuels in developing countries: A major source of atmospheric pollutants: J. Atmos. Chem., 44, 23-37, 2003.
Lutsch, E., Dammers, E., Conway, S., and Strong, K., Long-range transport of NH3, CO, HCN, and C2H6 from the 2014 Canadian Wildfires: Geophys. Res. Lett., 43, 8286-8297, doi:10.1002/2016gl070114, 2016.
Manö, S., and Andreae, M. O., Emission of methyl bromide from biomass burning: Science, 263, 1255-1257, 1994.
Manö, S., Messung von partiell oxidierten Kohlenwasserstoffen in Emissionen von Biomasseverbrennung. Ph.D. Thesis. Frankfurt: Goethe-Universität, 120 p, 1995.
Martins, J. V., Artaxo, P., Hobbs, P. V., Liousse, C., Cachier, H., Kaufman, Y., and Plana-Fattori, A., Particle size distributions, elemental compositions, carbon measurements, and optical properties of smoke from biomass burning in the Pacific Northwest of the United States, in Biomass Burning and Global Change, edited by J. S. Levine, pp. 716-732, MIT Press, Cambridge, Mass., 1996.
Marufu, L., Ludwig, J., Andreae, M. O., Lelieveld, J., and Helas, G., Spatial and temporal variation in biofuel consumption rates and patterns in Zimbabwe: Implications for atmospheric trace gas emission: Biomass and Bioenergy, 16, 311-332, 1999.
Masclet, P., Cachier, H., Liousse, C., and Wortham, H., Emissions of polycyclic aromatic hydrocarbons by savanna fires: J. Atmos. Chem., 22, 41-54, 1995.
May, A. A., McMeeking, G. R., Lee, T., Taylor, J. W., Craven, J. S., Burling, I., Sullivan, A. P., Akagi, S., Collett, J. L., Flynn, M., Coe, H., Urbanski, S. P., Seinfeld, J. H., Yokelson, R. J., and Kreidenweis, S. M., Aerosol emissions from prescribed fires in the United States: A synthesis of laboratory and aircraft measurements: J. Geophys. Res., 119, 11,826–11,849, doi:10.1002/2014JD021848,…
McDonald, R. D., Zielinska, B., Fujita, E. M., Sagebiel, J. C., Chow, J. C., and Watson, J. G., Fine particle and gaseous emission rates from residential wood combustion: Environ. Sci. Technol., 34, 2080-2091, 2000.
McKenzie, L. M., Hao, W. M., Richards, G. N., and Ward, D. E., Measurement and modeling of air toxins from smoldering combustion of biomass: Environ. Sci. Technol., 29, 2047-2054, 1995.
McMeeking, G. R., Kreidenweis, S. M., Baker, S., Carrico, C. M., Chow, J. C., Collett, J. L., Hao, W. M., Holden, A. S., Kirchstetter, T. W., Malm, W. C., Moosmuller, H., Sullivan, A. P., and Wold, C. E., Emissions of trace gases and aerosols during the open combustion of biomass in the laboratory: J. Geophys. Res., 114, D19210, doi:10.1029/2009jd011836, 2009.
Mebust, A. K., Russell, A. R., Hudman, R. C., Valin, L. C., and Cohen, R. C., Characterization of wildfire NOx emissions using MODIS fire radiative power and OMI tropospheric NO2 columns: Atmos. Chem. Phys., 11, 5839-5851, doi:10.5194/acp-11-5839-2011, 2011.
Medeiros, P. M., and Simoneit, B. R. T., Source profiles of organic compounds emitted upon combustion of green vegetation from temperate climate forests: Environ. Sci. Technol., 42, 8310-8316, doi:10.1021/es801533b, 2008.
Melendez-Perez, J. J., Fostier, A. H., Carvalho, J. A., Jr., Windmoeller, C. C., Santos, J. C., and Carpi, A., Soil and biomass mercury emissions during a prescribed fire in the Amazonian rain forest: Atmospheric Environment, 96, 415-422, doi:10.1016/j.atmosenv.2014.06.032, 2014.
Miner, S., Preliminary air pollution survey of ammonia, Report APTD-69-25. Raleigh, N.C.: Nat. Air Pollut. Control Admin., 39 p, 1969.
Miura, Y., and Kanno, T., Emissions of trace gases (CO2, CO, CH4, N2O) resulting from rice straw burning: Soil Sci. Plant Nutr., 43, 849-854, 1997.
Mugica-Álvarez, V., Hernández-Rosas, F., Magaña-Reyes, M., Herrera-Murillo, J., Santiago-De La Rosa, N., Gutiérrez-Arzaluz, M., de Jesús Figueroa-Lara, J., and González-Cardoso, G., Sugarcane burning emissions: Characterization and emission factors: Atmospheric Environment, 193, 262-272, doi:10.1016/j.atmosenv.2018.09.013, 2018.
Müller, M., Anderson, B. E., Beyersdorf, A. J., Crawford, J. H., Diskin, G. S., Eichler, P., Fried, A., Keutsch, F. N., Mikoviny, T., Thornhill, K. L., Walega, J. G., Weinheimer, A. J., Yang, M., Yokelson, R. J., and Wisthaler, A., In situ measurements and modeling of reactive trace gases in a small biomass burning plume: Atmos. Chem. Phys., 16, 3813-3824, doi:10.5194/acp-16-3813-2016, 2016.
Munchak, L. A., Schichtel, B. A., Sullivan, A. P., Holden, A. S., Kreidenweis, S. M., Malm, W. C., and Collett, J. L., Development of wildland fire particulate smoke marker to organic carbon emission ratios for the conterminous United States: Atmospheric Environment, 45, 395-403, doi:10.1016/j.atmosenv.2010.10.006, 2011.
Nance, J. D., Hobbs, P. V., Radke, L. F., and Ward, D. E., Airborne measurements of gases and particles from an Alaskan wildfire: J. Geophys. Res., 98, 14,873-14,882, 1993.
Nara, H., Tanimoto, H., Tohjima, Y., Mukai, H., Nojiri, Y., and Machida, T., Emission factors of CO2, CO and CH4 from Sumatran peatland fires in 2013 based on shipboard measurements: Tellus Series B-Chemical and Physical Meteorology, 69, doi:10.1080/16000889.2017.1399047, 2017.
Nguyen, B. C., Rice straw burning in southeast Asia as a source of CO and COS to the atmosphere: J. Geophys. Res., 99, 16,435-16,439, 1994.
Nguyen, B. C., Mihalopoulos, N., Putaud, J. P., and Bonsang, B., Carbonyl sulfide emissions from biomass burning in the tropics: J. Atmos. Chem., 22, 55-65, 1995.
Ni, H. Y., Han, Y. M., Cao, J. J., Chen, L. W. A., Tian, J., Wang, X. L., Chow, J. C., Watson, J. G., Wang, Q. Y., Wang, P., Li, H., and Huang, R. J., Emission characteristics of carbonaceous particles and trace gases from open burning of crop residues in China: Atmospheric Environment, 123, 399-406, doi:10.1016/j.atmosenv.2015.05.007, 2015.
Ni, H. Y., Tian, J., Wang, X. L., Wang, Q. Y., Han, Y. M., Cao, J. J., Long, X., Chen, L. W. A., Chow, J. C., Watson, J. G., Huang, R. J., and Dusek, U., PM2.5 emissions and source profiles from open burning of crop residues: Atmospheric Environment, 169, 229-237, doi:10.1016/j.atmosenv.2017.08.063, 2017.
Njenga, M., Karanja, N., Karlsson, H., Jamnadass, R., Iiyama, M., Kithinji, J., and Sundberg, C., Additional cooking fuel supply and reduced global warming potential from recycling charcoal dust into charcoal briquette in Kenya: Journal of Cleaner Production, 81, 81-88, doi:10.1016/j.jclepro.2014.06.002, 2014.
O'Shea, S. J., Allen, G., Gallagher, M. W., Bauguitte, S. J. B., Illingworth, S. M., Le Breton, M., Muller, J. B. A., Percival, C. J., Archibald, A. T., Oram, D. E., Parrington, M., Palmer, P. I., and Lewis, A. C., Airborne observations of trace gases over boreal Canada during BORTAS: campaign climatology, air mass analysis and enhancement ratios: Atmos. Chem. Phys., 13, 12,451-12,467, doi:10.519…
Obrist, D., Moosmüller, H., Schürmann, R., Chen, L. W. A., and Kreidenweis, S. M., Particulate-phase and gaseous elemental mercury emissions during biomass combustion: Controlling factors and correlation with particulate matter emissions: Environ. Sci. Technol., 42, 721-727, doi:10.1021/es071279n, 2008.
Oros, D. R., and Simoneit, B. R. T., Identification and emission factors of molecular tracers in organic aerosols from biomass burning Part 1. Temperate climate conifers: Applied Geochemistry, 16, 1513-1544, doi:10.1016/s0883-2927(01)00021-x, 2001a.
Oros, D. R., and Simoneit, B. R. T., Identification and emission factors of molecular tracers in organic aerosols from biomass burning Part 2. Deciduous trees: Applied Geochemistry, 16, 1545-1565, doi:10.1016/s0883-2927(01)00022-1, 2001b.
Oros, D. R., bin Abas, M. R., Omar, N., Rahman, N. A., and Simoneit, B. R. T., Identification and emission factors of molecular tracers in organic aerosols from biomass burning: Part 3. Grasses: Applied Geochemistry, 21, 919-940, doi:10.1016/j.apgeochem.2006.01.008, 2006.
Pallozzi, E., Lusini, I., Cherubini, L., Hajiaghayeva, R. A., Ciccioli, P., and Calfapietra, C., Differences between a deciduous and a conifer tree species in gaseous and particulate emissions from biomass burning: Environmental Pollution, 234, 457-467, doi:doi.org/10.1016/j.envpol.2017.11.080, 2018.
Pandey, A., Patel, S., Pervez, S., Tiwari, S., Yadama, G., Chow, J. C., Watson, J. G., Biswas, P., and Chakrabarty, R. K., Aerosol emissions factors from traditional biomass cookstoves in India: insights from field measurements: Atmos. Chem. Phys., 17, 13721-13729, doi:10.5194/acp-17-13721-2017, 2017.
Parashar, D. C., Gadi, R., Mandal, T. K., and Mitra, A. P., Carbonaceous aerosol emissions from India: Atmospheric Environment, 39, 7861-7871, doi:10.1016/j.atmosenv.2005.08.034, 2005.
Park, S.-K., Choi, S.-J., Kim, J.-Y., Park, G.-J., Hwang, U.-H., Lee, J.-J., and Kim, T.-S., A field survey on the characteristics of air pollutants emission from commercial charcoal kiln: Journal of Korean Society for Atmospheric Environmnet, 29, 601-614, doi:10.5572/kosae.2013.29.5.601, 2013.
Paton-Walsh, C., Jones, N. B., Wilson, S. R., Haverd, V., Meier, A., Griffith, D. W. T., and Rinsland, C. P., Measurements of trace gas emissions from Australian forest fires and correlations with coincident measurements of aerosol optical depth: J. Geophys. Res., 110, D24305, doi:10.1029/2005JD006202, 2005.
Paton-Walsh, C., Wilson, S. R., Jones, N. B., and Griffith, D. W. T., Measurement of methanol emissions from Australian wildfires by ground-based solar Fourier transform spectroscopy: Geophys. Res. Lett., 35, L08810, doi:10.1029/2007GL032951, 2008.
Paton-Walsh, C., Deutscher, N. M., Griffin, D. W. T., Forgan, B. W., Wilson, S. R., Jones, N. B., and Edwards, D. P., Trace gas emissions from savanna fires in northern Australia: J. Geophys. Res., 115, D16314, doi:10.1029/2009JD013309, 2010.
Pennise, D. M., Smith, K. R., Kithinji, J. P., Rezende, M. E., Raad, T. J., Zhang, J. F., and Fan, C. W., Emissions of greenhouse gases and other airborne pollutants from charcoal making in Kenya and Brazil: J. Geophys. Res., 106, 24,143-24,155, 2001.
Pham-Van-Dinh, Serpolay, R., and Lacaux, J.-P., Laboratory investigation on aerosols from the combustion of savanna grass and cereal straw, in Biomass Burning and Global Change, edited by J. S. Levine, pp. 472-484, MIT Press, Cambridge, Mass., 1996.
Piccot, S. D., Beck, L., Srinivasan, S., and Kersteter, S. L., Global methane emissions from minor anthropogenic sources and biofuel combustion in residential stoves: J. Geophys. Res., 101, 22,757-22,766, 1996.
Pöhlker, M. L., Ditas, F., Saturno, J., Klimach, T., Hrabě de Angelis, I., Araùjo, A. C., Brito, J., Carbone, S., Cheng, Y., Chi, X., Ditz, R., Gunthe, S. S., Holanda, B. A., Kandler, K., Kesselmeier, J., Könemann, T., Krüger, O. O., Lavrič, J. V., Martin, S. T., Mikhailov, E., Moran-Zuloaga, D., Rizzo, L. V., Rose, D., Su, H., Thalman, R., Walter, D., Wang, J., Wolff, S., Barbosa, H. M. J., Arta…
Prasad, V. K., Gupta, P. K., Sharma, C., Sarkar, A. K., Kant, Y., Badarinath, K. V. S., Rajagopal, T., and Mitra, A. P., NOx emissions from biomass burning of shifting cultivation areas from tropical deciduous forests of India - estimates from ground-based measurements: Atmospheric Environment, 34, 3271-3280, 2000.
Radke, L. F., Hegg, D. A., Lyons, J. H., Brock, C. A., Hobbs, P. V., Weiss, R., and Rasmussen, R., Airborne measurements on smokes from biomass burning, in Aerosols and Climate, edited by P. V. Hobbs & M. P. McCormick, pp. 411-422, A. Deepak Publishing, Hampton, VA, 1988.
Radke, L. F., Lyons, J. H., Hobbs, P. V., Hegg, D. A., Sandberg, D. V., and Ward, D. E., Airborne Monitoring and Smoke Characterization of Prescribed Fires on Forest Lands in Western Washington and Oregon: Final Report USDA Forest Service General Technical Report PNW-GTR-251. Portland, Ore., USA: USDA Forest Service, 81 p, 1990.
Radke, L. F., Hegg, D. A., Hobbs, P. V., Nance, J. D., Lyons, J. H., Laursen, K. K., Weiss, R. E., Riggan, P. J., and Ward, D. E., Particulate and trace gas emissions from large biomass fires in North America, in Global Biomass Burning: Atmospheric, Climatic and Biospheric Implications, edited by J. S. Levine, pp. 209-224, MIT Press, Cambridge, Mass., 1991.
Rasmussen, R. A., Rasmussen, L. E., Khalil, M. A. K., and Dalluge, R. W., Concentration distribution of methyl chloride in the atmosphere: J. Geophys. Res., 85, 7350-7356, 1980.
Reinhardt, T. E., and Ward, D. E., Factors affecting methyl chloride emissions from forest biomass combustion: Environ. Sci. Tech., 29, 825-832, 1995.
Reisen, F., Meyer, C. P., Weston, C. J., and Volkova, L., Ground-based field measurements of PM2.5 emission factors from flaming and smoldering combustion in eucalypt forests: J. Geophys. Res., 123, 8301-8314, doi:10.1029/2018JD028488, 2018.
Rinsland, C. P., Dufour, G., Boone, C. D., Bernath, P. F., Chiou, L., Coheur, P. F., Turquety, S., and Clerbaux, C., Satellite boreal measurements over Alaska and Canada during June-July 2004: Simultaneous measurements of upper tropospheric CO, C2H6, HCN, CH3Cl, CH4, C2H2, CH3OH, HCOOH, OCS, and SF6 mixing ratios: Global Biogeochemical Cycles, 21, GB3008, doi:10.1029/2006gb002795, 2007.
Robertson, K. M., Hsieh, Y. P., and Bugna, G. C., Fire environment effects on particulate matter emission factors in southeastern U.S. pine-grasslands: Atmospheric Environment, 99, 104-111, doi:10.1016/j.atmosenv.2014.09.058, 2014.
Roden, C. A., Bond, T. C., Conway, S., and Pinel, A. B. O., Emission factors and real-time optical properties of particles emitted from traditional wood burning cookstoves: Environ. Sci. Technol., 40, 6750-6757, 2006.
Roden, C. A., Bond, T. C., Conway, S., Pinel, A. B. S., MacCarty, N., and Still, D., Laboratory and field investigations of particulate and carbon monoxide emissions from traditional and improved cookstoves: Atmospheric Environment, 43, 1170-1181, doi:10.1016/j.atmosenv.2008.05.041, 2009.
Romasanta, R. R., Sander, B. O., Gaihre, Y. K., Alberto, M. C., Gummert, M., Quilty, J., Nguyen, V. H., Castalone, A. G., Balingbing, C., Sandro, J., Correa, T., and Wassmann, R., How does burning of rice straw affect CH4 and N2O emissions? A comparative experiment of different on-field straw management practices: Agriculture Ecosystems & Environment, 239, 143-153, doi:10.1016/j.agee.2016.12.042,…
Rudolph, J., Khedim, A., Koppmann, R., and Bonsang, B., Field study of the emissions of methyl chloride and other halocarbons from biomass burning in western Africa: J. Atmos. Chem., 22, 67-80, 1995.
Saarnak, C. F., Nielsen, T. T., and Mbow, C., A local-scale study of the trace gas emissions from vegetation burning around the village of Dalun, Ghana, with respect to seasonal vegetation changes and burning practices: Clim. Change, 56, 321-338, 2003.
Sahai, S., Sharma, C., Singh, D. P., Dixit, C. K., Singh, N., Sharma, P., Singh, K., Bhatt, S., Ghude, S., Gupta, V., Gupta, R. K., Tiwari, M. K., Garg, S. C., Mitra, A. P., and Gupta, P. K., A study for development of emission factors for trace gases and carbonaceous particulate species from in situ burning of wheat straw in agricultural fields in india: Atmospheric Environment, 41, 9173-9186, d…
Sahu, L. K., Kondo, Y., Moteki, N., Takegawa, N., Zhao, Y., Cubison, M. J., Jimenez, J. L., Vay, S., Diskin, G. S., Wisthaler, A., Mikoviny, T., Huey, L. G., Weinheimer, A. J., and Knapp, D. J., Emission characteristics of black carbon in anthropogenic and biomass burning plumes over California during ARCTAS-CARB 2008: J. Geophys. Res., 117, D16302, doi:10.1029/2011jd017401, 2012.
Samburova, V., Connolly, J., Gyawali, M., Yatavelli, R. L. N., Watts, A. C., Chakrabarty, R. K., Zielinska, B., Moosmuller, H., and Khlystov, A., Polycyclic aromatic hydrocarbons in biomass-burning emissions and their contribution to light absorption and aerosol toxicity: Science of the Total Environment, 568, 391-401, doi:10.1016/j.scitotenv.2016.06.026, 2016.
Sanchis, E., Ferrer, M., Calvet, S., Coscolla, C., Yusa, V., and Cambra-Lopez, M., Gaseous and particulate emission profiles during controlled rice straw burning: Atmospheric Environment, 98, 25-31, doi:10.1016/j.atmosenv.2014.07.062, 2014.
Santiago-De la Rosa, N., Mugica-Alvarez, V., Cereceda-Balic, F., Guerrero, F., Yanez, K., and Lapuerta, M., Emission factors from different burning stages of agriculture wastes in Mexico: Environ. Sci. & Pollut. Res., 24, 24297-24310, doi:10.1007/s11356-017-0049-4, 2017.
Santiago-De La Rosa, N., Gonzalez-Cardoso, G., Figueroa-Lara, J. D., Gutierrez-Arzaluz, M., Octaviano-Villasana, C., Ramirez-Hernandez, I. F., and Mugica-Alvarez, V., Emission factors of atmospheric and climatic pollutants from crop residues burning: J. Air & Waste Manage. Assoc., 68, 849-865, doi:10.1080/10962247.2018.1459326, 2018.
Saud, T., Mandal, T. K., Gadi, R., Singh, D. P., Sharma, S. K., Saxena, M., and Mukherjee, A., Emission estimates of particulate matter (PM) and trace gases (SO2, NO and NO2) from biomass fuels used in rural sector of Indo-Gangetic Plain, India: Atmospheric Environment, 45, 5913-5923, doi:10.1016/j.atmosenv.2011.06.031, 2011.
Schauer, J. J. (1998). Source contributions to atmospheric organic compound concentrations: Emission measurements and model predictions. Ph. D., California Institute of Technology.
Schauer, J. J., Kleeman, M. J., Cass, G. R., and Simoneit, B. R. T., Measurement of emissions from air pollution sources. 3. C1-C29 Organic compounds from fireplace combustion of wood: Environ. Sci. Technol., 35, 1716-1728, 2001.
Schreier, S. F., Richter, A., Schepaschenko, D., Shvidenko, A., Hilboll, A., and Burrows, J. P., Differences in satellite-derived NOx emission factors between Eurasian and North American boreal forest fires: Atmospheric Environment, 121, 55-65, doi:10.1016/j.atmosenv.2014.08.071, 2015.
Selimovic, V., Yokelson, R. J., Warneke, C., Roberts, J. M., de Gouw, J., Reardon, J., and Griffith, D. W. T., Aerosol optical properties and trace gas emissions by PAX and OP-FTIR for laboratory-simulated western US wildfires during FIREX: Atmos. Chem. Phys., 18, 2929-2948, doi:10.5194/acp-18-2929-2018, 2018.
Selimovic, V., Yokelson, R. J., McMeeking, G. R., and Coefield, S., In situ measurements of trace gases, PM, and aerosol optical properties during the 2017 NW US wildfire smoke event: Atmos. Chem. Phys., 19, 3905-3926, doi:10.5194/acp-19-3905-2019, 2019.
Sheesley, R. J., Schauer, J. J., Chowdhury, Z., Cass, G. R., and Simoneit, B. R. T., Characterization of organic aerosols emitted from the combustion of biomass indigenous to South Asia: J. Geophys. Res., 108, 4285, doi:10.1029/2002JD002981, 2003.
Shen, G., Wei, S., Wei, W., Zhang, Y., Min, Y., Wang, B., Ron, W., Li, W., Shen, H., Huang, Y., Yang, Y., Wang, W., Wang, X., Wang, X., and Tao, S., Emission factors, size distributions, and emission inventories of carbonaceous particulate matter from residential wood combustion in rural China: Environ. Sci. Technol., 46, 4207-4214, doi:10.1021/es203957u, 2012a.
Shen, G. F., Yang, Y. F., Wang, W., Tao, S., Zhu, C., Min, Y. J., Xue, M. A., Ding, J. N., Wang, B., Wang, R., Shen, H. Z., Li, W., Wang, X. L., and Russell, A. G., Emission factors of particulate matter and elemental carbon for crop residues and coals burned in typical household stoves in China: Environ. Sci. Technol., 44, 7157-7162, doi:10.1021/es101313y, 2010.
Shen, G. F., Wang, W., Yang, Y. F., Ding, J. N., Xue, M. A., Min, Y. J., Zhu, C., Shen, H. Z., Li, W., Wang, B., Wang, R., Wang, L., Tao, S., and Russell, A. G., Emissions of PAHs from indoor crop residue burning in a typical rural stove: Emission factors, size distributions, and gas-particle partitioning: Environ. Sci. Technol., 45, 1206-1212, doi:10.1021/es102151w, 2011.
Shen, G. F., Tao, S., Wei, S. Y., Zhang, Y. Y., Wang, R., Wang, B., Li, W., Shen, H. Z., Huang, Y., Chen, Y. C., Chen, H., Yang, Y. F., Wang, W., Wang, X. L., Liu, W. X., and Simonich, S. L. M., Emissions of parent, nitro, and oxygenated polycyclic aromatic hydrocarbons from residential wood combustion in rural China: Environ. Sci. Technol., 46, 8123-8130, doi:10.1021/es301146v, 2012b.
Shen, G. F., Tao, S., Chen, Y. C., Zhang, Y. Y., Wei, S. Y., Xue, M., Wang, B., Wang, R., Lu, Y., Li, W., Shen, H. Z., Huang, Y., and Chen, H., Emission characteristics for polycyclic aromatic hydrocarbons from solid fuels burned in domestic stoves in rural China: Environ. Sci. Technol., 47, 14485-14494, doi:10.1021/es403110b, 2013.
Shen, G. F., Xue, M., Chen, Y. C., Yang, C. L., Li, W., Shen, H. Z., Huang, Y., Zhang, Y. Y., Chen, H., Zhu, Y., Wu, H. S., Ding, A. J., and Tao, S., Comparison of carbonaceous particulate matter emission factors among different solid fuels burned in residential stoves: Atmospheric Environment, 89, 337-345, doi:10.1016/j.atmosenv.2014.01.033, 2014.
Shen, G. F., Chen, Y. C., Xue, C. Y., Lin, N., Huang, Y., Shen, H. Z., Wang, Y. L., Li, T. C., Zhang, Y. Y., Su, S., Huangfu, Y. B., Zhang, W. H., Chen, X. F., Liu, G. Q., Liu, W. X., Wang, X. L., Wong, M. H., and Tao, S., Pollutant emissions from improved coal- and wood-fuelled cookstoves in rural households: Environ. Sci. Technol., 49, 6590-6598, doi:10.1021/es506343z, 2015.
Shirai, T., Blake, D. R., Meinardi, S., Rowland, F. S., Russell-Smith, J., Edwards, A., Kondo, Y., Koike, M., Kita, K., Machida, T., Takegawa, N., Nishi, N., Kawakami, S., and Ogawa, T., Emission estimates of selected volatile organic compounds from tropical savanna burning in northern Australia: J. Geophys. Res., 108, 8406, doi:10.1029/2001JD000841, 2003.
Sigler, J. M., Lee, X., and Munger, W., Emission and long-range transport of gaseous mercury from a large-scale Canadian boreal forest fire: Environ. Sci. Technol., 37, 4343-4347, doi:10.1021/es026401r, 2003.
Sillapapiromsuk, S., Chantara, S., Tengjaroenkul, U., Prasitwattanaseree, S., and Prapamontol, T., Determination of PM10 and its ion composition emitted from biomass burning in the chamber for estimation of open burning emissions: Chemosphere, 93, 1912-1919, doi:10.1016/j.chemosphere.2013.06.071, 2013.
Simpson, I. J., Akagi, S. K., Barletta, B., Blake, N. J., Choi, Y., Diskin, G. S., Fried, A., Fuelberg, H. E., Meinardi, S., Rowland, F. S., Vay, S. A., Weinheimer, A. J., Wennberg, P. O., Wiebring, P., Wisthaler, A., Yang, M., Yokelson, R. J., and Blake, D. R., Boreal forest fire emissions in fresh Canadian smoke plumes: C1-C10 volatile organic compounds (VOCs), CO2, CO, NO2, NO, HCN and CH3CN: …
Singh, H. B., O'Hara, D., Herlth, D., Sachse, G. W., Blake, D. R., Bradshaw, J. D., Kanakidou, M., and Crutzen, P. J., Acetone in the atmosphere: Distribution, sources and sinks: J. Geophys. Res., 99, 1805-1819, 1994.
Singh, H. B., Anderson, B. E., Brune, W. H., Cai, C., Cohen, R. C., Crawford, J. H., Cubison, M. J., Czech, E. P., Emmons, L., Fuelberg, H. E., Huey, G., Jacob, D. J., Jimenez, J. L., Kaduwela, A., Kondo, Y., Mao, J., Olson, J. R., Sachse, G. W., Vay, S. A., Weinheimer, A., Wennberg, P. O., Wisthaler, A., and the ARCTAS Sci Team, Pollution influences on atmospheric composition and chemistry at hi…
Sinha, P., Hobbs, P. V., Yokelson, R. J., Bertschi, I. T., Blake, D. R., Simpson, I. J., Gao, S., Kirchstetter, T. W., and Novakov, T., Emissions of trace gases and particles from savanna fires in southern Africa: J. Geophys. Res., 108, 8487, doi:10.1029/2002JD002325, 2003.
Sinha, P., Hobbs, P. V., Yokelson, R. J., Blake, D. R., Gao, S., and Kirchstetter, T. W., Emissions from miombo woodland and dambo grassland savanna fires: J. Geophys. Res., 109, D11305, doi:10.1029/2004jd004521, 2004.
Sirithian, D., Thepanondh, S., Sattler, M. L., and Laowagul, W., Emissions of volatile organic compounds from maize residue open burning in the northern region of Thailand: Atmospheric Environment, 176, 179-187, doi:10.1016/j.atmosenv.2017.12.032, 2018.
Smith, K. R., Air pollution: Assessing total exposure in developing countries: Environment, 30, 16-35, 1988.
Smith, K. R., Khalil, M. A. K., Rasmussen, R. A., Thorneloe, S. A., Manegdeg, F., and Apte, M., Greenhouse gases from biomass and fossil fuel stoves in developing countries: A Manila pilot study: Chemosphere, 26, 479-505, 1993.
Smith, K. R., Pennise, D. M., Khummongkol, P., Chaiwong, V., Ritgeen, K., Zhang, J., Panyathanya, W., Rasmussen, R. A., and Khalil, M. A. K., Greenhouse Gases From Small-Scale Combustion Devices in Developing Countries. Charcoal-Making Kilns in Thailand (No. EPA-600/R-99-109). U.S. Environmental Protection Agency, Research Triangle Park, NC, USA, 62 p. (1999).
Smith, K. R., Uma, R., Kishore, V. V. N., Lata, K., Joshi, V., Zhang, J., Rasmussen, R. A., and Khalil, M. A. K., Greenhouse Gases From Small-Scale Combustion Devices in Developing Countries: Phase IIa Household Stoves in India (No. EPA-600/R-00-052). U.S. Environmental Protection Agency, Research Triangle Park, NC, USA, 98 p. (2000a).
Smith, K. R., Uma, R., Kishore, V. V. N., Zhang, J. F., Joshi, V., and Khalil, M. A. K., Greenhouse implications of household stoves: An analysis for India: Annu. Rev. Energy Environ., 25, 741-763, 2000b.
Smith, T. E. L., Paton-Walsh, C., Meyer, C. P., Cook, G. D., Maier, S. W., Russell-Smith, J., Wooster, M. J., and Yates, C. P., New emission factors for Australian vegetation fires measured using open-path Fourier transform infrared spectroscopy – Part 2: Australian tropical savanna fires: Atmos. Chem. Phys., 14, 11335-11352, doi:10.5194/acp-14-11335-2014, 2014.
Smith, T. E. L., Evers, S., Yule, C. M., and Gan, J. Y., In situ tropical peatland fire emission factors and their variability, as determined by field measurements in peninsula Malaysia: Global Biogeochemical Cycles, 32, 18-31, doi:10.1002/2017GB005709, 2018.
Soares Neto, T. G., Carvalho, J. A., Jr., Veras, C. A. G., Alvarado, E. C., Gielow, R., Lincoln, E. N., Christian, T. J., Yokelson, R. J., and Santos, J. C., Biomass consumption and CO2, CO and main hydrocarbon gas emissions in an Amazonian forest clearing fire: Atmospheric Environment, 43, 438-446, doi:10.1016/j.atmosenv.2008.07.063, 2009.
Soares Neto, T. G., Carvalho, J. A., Cortez, E. V., Azevedo, R. G., Oliveira, R. A., Fidalgo, W. R. R., and Santos, J. C., Laboratory evaluation of Amazon forest biomass burning emissions: Atmospheric Environment, 45, 7455-7461, doi:10.1016/j.atmosenv.2011.05.003, 2011.
Stith, J. L., Radke, L. F., and Hobbs, P. V., Particle emissions and the production of ozone and nitrogen oxides from the burning of forest slash: Atmos. Environ., 15, 73-82, 1981.
Stockwell, C. E., Veres, P. R., Williams, J., and Yokelson, R. J., Characterization of biomass burning emissions from cooking fires, peat, crop residue, and other fuels with high-resolution proton-transfer-reaction time-of-flight mass spectrometry: Atmos. Chem. Phys., 15, 845-865, doi:10.5194/acp-15-845-2015, 2015.
Stockwell, C. E., Christian, T. J., Goetz, J. D., Jayarathne, T., Bhave, P. V., Praveen, P. S., Adhikari, S., Maharjan, R., DeCarlo, P. F., Stone, E. A., Saikawa, E., Blake, D. R., Simpson, I. J., Yokelson, R. J., and Panday, A. K., Nepal Ambient Monitoring and Source Testing Experiment (NAMaSTE): emissions of trace gases and light-absorbing carbon from wood and dung cooking fires, garbage and cr…
Stockwell, C. E., Jayarathne, T., Cochrane, M. A., Ryan, K. C., Putra, E. I., Saharjo, B. H., Nurhayati, A. D., Albar, I., Blake, D. R., Simpson, I. J., Stone, E. A., and Yokelson, R. J., Field measurements of trace gases and aerosols emitted by peat fires in Central Kalimantan, Indonesia, during the 2015 El Niño: Atmos. Chem. Phys., 16, 11711-11732, doi:10.5194/acp-16-11711-2016, 2016b.
Strand, T., Gullett, B., Urbanski, S., O'Neill, S., Potter, B., Aurell, J., Holder, A., Larkin, N., Moore, M., and Rorig, M., Grassland and forest understorey biomass emissions from prescribed fires in the southeastern United States - RxCADRE 2012: International Journal of Wildland Fire, 25, 102-113, doi:10.1071/wf14166, 2016.
Sun, J., Shen, Z., Cao, J., Zhang, L., Wu, T., Zhang, Q., Yin, X., Lei, Y., Huang, Y., Huang, R. J., Liu, S., Han, Y., Xu, H., Zheng, C., and Liu, P., Particulate matters emitted from maize straw burning for winter heating in rural areas in Guanzhong Plain, China: Current emission and future reduction: Atmos. Res., 184, 66-76, doi:10.1016/j.atmosres.2016.10.006, 2017.
Sun, J., Zhi, G., Jin, W., Chen, Y., Shen, G., Tian, C., Zhang, Y., Zong, Z., Cheng, M., Zhang, X., Zhang, Y., Liu, C., Lu, J., Wang, H., Xiang, J., Tong, L., and Zhang, X., Emission factors of organic carbon and elemental carbon for residential coal and biomass fuels in China- A new database for 39 fuel-stove combinations: Atmospheric Environment, 190, 241-248, doi:10.1016/j.atmosenv.2018.07.032…
Susott, R. A., Ward, D. E., Babbitt, R. E., Latham, D. J., Weger, L. G., and Boyd, P. M., Fire Dynamics and Chemistry of Large Fires (Final Report). Missoula, Montana: USDA Forest Service, 39 p, 1990.
Tang, X.-b., Huang, C., Lou, S.-r., Qiao, L.-p., Wang, H.-l., Zhou, M., Chen, M.-h., Chen, C.-h., Wang, Q., Li, G.-l., Li, L., Huang, H.-y., and Zhang, G.-f., Emission factors and PM chemical composition study of biomass burning in the Yangtze River Delta Region: Huanjing Kexue, 35, 1623-1632, 2014.
Tawfiq, M. F., Aroua, M. K., and Sulaiman, N. M. N., On-line CO, CO2 emissions evaluation and (benzene, toluene, xylene) determination from experimental burn of tropical biomass: Journal of Environmental Sciences, 33, 239-244, doi:10.1016/j.jes.2015.01.015, 2015.
Tereszchuk, K. A., Abad, G. G., Clerbaux, C., Hurtmans, D., Coheur, P. F., and Bernath, P. F., ACE-FTS measurements of trace species in the characterization of biomass burning plumes: Atmos. Chem. Phys., 11, 12169-12179, doi:10.5194/acp-11-12169-2011, 2011.
Tereszchuk, K. A., Abad, G. G., Clerbaux, C., Hadji-Lazaro, J., Hurtmans, D., Coheur, P. F., and Bernath, P. F., ACE-FTS observations of pyrogenic trace species in boreal biomass burning plumes during BORTAS: Atmos. Chem. Phys., 13, 4529-4541, doi:10.5194/acp-13-4529-2013, 2013.
Thompson, R. J., Li, J., Weyant, C. L., Edwards, R., Lan, Q., Rothman, N., Hu, W., Dang, J., Dang, A., Smith, K. R., and Bond, T. C., Field emission measurements of solid fuel stoves in Yunnan, China demonstrate dominant causes of uncertainty in household emission inventories: Environ. Sci. Technol., 53, 3323-3330, doi:10.1021/acs.est.8b07040, 2019.
Tian, J., Ni, H. Y., Cao, J. J., Han, Y. M., Wang, Q. Y., Wang, X. L., Chen, L. W. A., Chow, J. C., Watson, J. G., Wei, C., Sun, J., Zhang, T., and Huang, R. J., Characteristics of carbonaceous particles from residential coal combustion and agricultural biomass burning in China: Atmospheric Pollution Research, 8, 521-527, doi:10.1016/j.apr.2016.12.006, 2017.
Tsai, S. M., Zhang, J. F., Smith, K. R., Ma, Y. Q., Rasmussen, R. A., and Khalil, M. A. K., Characterization of non-methane hydrocarbons emitted from various cookstoves used in China: Environ. Sci. Technol., 37, 2869-2877, 2003.
Turetsky, M. R., Harden, J. W., Friedli, H. R., Flannigan, M., Payne, N., Crock, J., and Radke, L., Wildfires threaten mercury stocks in northern soils: Geophys. Res. Lett., 33, L16403, doi:10.1029/2005gl025595, 2006.
Turn, S. Q., Jenkins, B. M., Chow, J. C., Pritchett, L. C., Campbell, D., Cahill, T., and Whalen, S. A., Elemental characterization of particulate matter emitted from biomass burning. Wind tunnel derived source profiles for herbaceous and wood fuels: J. Geophys. Res., 102, 3683-3699, 1997.
Urbanski, S. P., Hao, W. M., and Baker, S., Chemical composition of wildland fire emissions, in Wildland Fires and Air Pollution, edited by A. Bytnerowicz, M. J. Arbaugh, A. R. Riebau, & C. Andersen, pp. 79-107, 2009.
Urbanski, S. P., Combustion efficiency and emission factors for wildfire-season fires in mixed conifer forests of the northern Rocky Mountains, US: Atmos. Chem. Phys., 13, 7241-7262, doi:10.5194/acp-13-7241-2013, 2013.
Vasileva, A., Moiseenko, K., Skorokhod, A., Belikov, I., Kopeikin, V., and Lavrova, O., Emission ratios of trace gases and particles for Siberian forest fires on the basis of mobile ground observations: Atmos. Chem. Phys., 17, 12303-12325, doi:10.5194/acp-17-12303-2017, 2017.
Veldt, C., GEIA note on residential biomass burning. A short communication about emission factors for the residential combustion of biomass fuels, unpublished, 1992.
Venkataraman, C., and Rao, G. U. M., Emission factors of carbon monoxide and size-resolved aerosols from biofuel combustion: Environ. Sci. Technol., 35, 2100-2107, 2001.
Venkataraman, C., Habib, G., Eiguren-Fernandez, A., Miguel, A. H., and Friedlander, S. K., Residential biofuels in South Asia: Carbonaceous aerosol emissions and climate impacts: Science, 307, 1454-1456, 2005.
Viatte, C., Strong, K., Hannigan, J., Nussbaumer, E., Emmons, L. K., Conway, S., Paton-Walsh, C., Hartley, J., Benmergui, J., and Lin, J., Identifying fire plumes in the Arctic with tropospheric FTIR measurements and transport models: Atmos. Chem. Phys., 15, 2227-2246, doi:10.5194/acp-15-2227-2015, 2015.
Vicente, A., Alves, C., Monteiro, C., Nunes, T., Mirante, F., Evtyugina, M., Cerqueira, M., and Pio, C., Measurement of trace gases and organic compounds in the smoke plume from a wildfire in Penedono (central Portugal): Atmospheric Environment, 45, 5172-5182, doi:10.1016/j.atmosenv.2011.06.021, 2011.
Vicente, A., Alves, C., Monteiro, C., Nunes, T., Mirante, F., Cerqueira, M., Calvo, A., and Pio, C., Organic speciation of aerosols from wildfires in central Portugal during summer 2009: Atmospheric Environment, 57, 186-196, doi:10.1016/j.atmosenv.2012.04.030, 2012.
Vicente, E. D., and Alves, C. A., An overview of particulate emissions from residential biomass combustion: Atmos. Res., 199, 159-185, doi:10.1016/j.atmosres.2017.08.027, 2018.
Vicente, E. D., Vicente, A., Evtyugina, M., Carvalho, R., Tarelho, L. A. C., Oduber, F. I., and Alves, C., Particulate and gaseous emissions from charcoal combustion in barbecue grills: Fuel Processing Technology, 176, 296-306, doi:10.1016/j.fuproc.2018.03.004, 2018.
Virkkula, A., Pohja, T., Aalto, P. P., Keronen, P., Schobesberger, S., Clements, C. B., Petaja, T., Nikmo, J., and Kulrnala, M., Airborne measurements of aerosols and carbon dioxide during a prescribed fire experiment at a boreal forest site: Boreal Environment Research, 19, 153-181, 2014.
Vose, J. M., Swank, W. T., Geron, C. D., and Major, A. E., Emissions from forest burning in the Southeastern United States: Application of a model determining spatial and temporal fire variation, in Biomass Burning and Global Change, edited by J. S. Levine, pp. 733-749, MIT Press, Cambridge, Mass., 1996.
Wang, H. L., Zhuang, Y. H., Hao, Z. P., Cao, M. Q., Zhong, J. X., Wang, X. K., and Oanh, N. T. K., Polycyclic aromatic hydrocarbons from rural household biomass burning in a typical Chinese village: Science in China Series D-Earth Sciences, 51, 1013-1020, doi:10.1007/s11430-008-0064-x, 2008.
Wang, H. L., Lou, S. R., Huang, C., Qiao, L. P., Tang, X. B., Chen, C. H., Zeng, L. M., Wang, Q., Zhou, M., Lu, S. H., and Yu, X. N., Source profiles of volatile organic compounds from biomass burning in Yangtze River Delta, China: Aerosol and Air Quality Research, 14, 818-828, doi:10.4209/aaqr.2013.05.0174, 2014.
Wang, S., Wei, W., Du, L., Li, G., and Hao, J., Characteristics of gaseous pollutants from biofuel-stoves in rural China: Atmospheric Environment, 43, 4148-4154, doi:10.1016/j.atmosenv.2009.05.040, 2009.
Wang, X. Y., Meyer, C. P., Reisen, F., Keywood, M., Thai, P. K., Hawker, D. W., Powell, J., and Mueller, J. F., Emission factors for selected semivolatile organic chemicals from burning of tropical biomass fuels and estimation of annual Australian emissions: Environ. Sci. Technol., 51, 9644-9652, doi:10.1021/acs.est.7b01392, 2017a.
Wang, X. Y., Thai, P. K., Mallet, M., Desservettaz, M., Hawker, D. W., Keywood, M., Miljevic, B., Paton-Walsh, C., Gallen, M., and Mueller, J. F., Emissions of selected semivolatile organic chemicals from forest and savannah fires: Environ. Sci. Technol., 51, 1293-1302, doi:10.1021/acs.est.6b03503, 2017b.
Ward, D., and Hardy, C., Advances in the characterization and control of emissions from prescribed broadcast fires of coniferous species logging slash on clearcut units. Final Report to U.S. Environmental Protection Agency and U.S. Dept. of Energy. Missoula, Mont., USA, 1986.
Ward, D. E., McMahon, C. K., and Adams, D. F., Laboratory measurements of carbonyl sulfide and total sulfur emissions from open burning of forest biomass. Paper presented at the 75th Annual Meeting of the Air Pollution Control Association, New Orleans, Louisiana, 20-25 June, 1982., 1-16, 1982.
Ward, D. E., and Hardy, C. C., Emissions from prescribed chaparral burning. Paper presented at the Air & Waste Management Association Annual Meeting, Anaheim, CA, pp. 21.
Ward, D. E., Susott, R. A., Babbitt, R. E., and Hardy, C. C., Properties and concentration of smoke near the ground from biomass field tests. Paper presented at the Symposium on Smoke/Obscurants XIV; 17-19 April 1990, Laurel, Maryland, USA., 21 p, 1990.
Ward, D. E., and Hardy, C. C., Smoke emissions from wildland fires: Environment International, 17, 117-134, 1991.
Ward, D. E., Setzer, A. W., Kaufman, Y. J., and Rasmussen, R. A., Characteristics of smoke emissions from biomass fires of the Amazon region - BASE-A experiment, in Global Biomass Burning: Atmospheric, Climatic, and Biospheric Implications, edited by J. S. Levine, pp. 394-402, MIT Press, Cambridge, Mass., 1991.
Ward, D. E., Susott, R. A., Kauffman, J. B., Babbitt, R. E., Cummings, D. L., Dias, B., Holben, B. N., Kaufman, Y. J., Rasmussen, R. A., and Setzer, A. W., Smoke and fire characteristics for cerrado and deforestation burns in Brazil: BASE-B experiment: J. Geophys. Res., 97, 14,601-14,619, 1992.
Ward, D. E., Hao, W.-M., Susott, R. A., Babbitt, R. A., Shea, R. W., Kauffman, J. B., and Justice, C. O., Effect of fuel composition on combustion efficiency and emission factors for African savanna ecosystems: J. Geophys. Res., 101, 23,569-23,576, 1996.
Ward, D. E., Chidumayo, E., Baker, S. P., and Susott, R. A., Charcoal production and smoke emissions from earthen kilns in Zambia. A Final Report for EPA/IAGDW12935987-01-0. Intermountain Fire Sciences Laboratory, Rocky Mountain Research Station, USDA Forest Service, Missoula, MT 59807, 34 p. (1999).
Wathore, R., Mortimer, K., and Grieshop, A. P., In-use emissions and estimated impacts of traditional, natural- and forced-draft cookstoves in rural Malawi: Environ. Sci. Technol., 51, 1929-1938, doi:10.1021/acs.est.6b05557, 2017.
Wei, S. Y., Shen, G. F., Zhang, Y. Y., Xue, M., Xie, H., Lin, P. C., Chen, Y. C., Wang, X. L., and Tao, S., Field measurement on the emissions of PM, OC, EC and PAHs from indoor crop straw burning in rural China: Environmental Pollution, 184, 18-24, doi:10.1016/j.envpol.2013.07.036, 2014.
Weiss-Penzias, P., Jaffe, D., Swartzendruber, P., Hafner, W., Chand, D., and Prestbo, E., Quantifying Asian and biomass burning sources of mercury using the Hg/CO ratio in pollution plumes observed at the Mount Bachelor observatory: Atmospheric Environment, 41, 4366-4379, doi:http://dx.doi.org/10.1016/j.atmosenv.2007.01.058, 2007.
Wentworth, G. R., Aklilu, Y.-a., Landis, M. S., and Hsu, Y.-M., Impacts of a large boreal wildfire on ground level atmospheric concentrations of PAHs, VOCs and ozone: Atmospheric Environment, 178, 19-30, doi:10.1016/j.atmosenv.2018.01.013, 2018.
Whitburn, S., Van Damme, M., Clarisse, L., Hurtmans, D., Clerbaux, C., and Coheur, P. F., IASI-derived NH3 enhancement ratios relative to CO for the tropical biomass burning regions: Atmos. Chem. Phys., 17, 12239-12252, doi:10.5194/acp-17-12239-2017, 2017.
Wiriya, W., Chantara, S., Sillapapiromsuk, S., and Lin, N. H., Emission profiles of PM10-bound polycyclic aromatic hydrocarbons from biomass burning determined in chamber for assessment of air pollutants from open burning: Aerosol and Air Quality Research, 16, 2716-2727, doi:10.4209/aaqr.2015.04.0278, 2016.
Wofsy, S. C., Sachse, G. W., Gregory, G. L., Blake, D. R., Bradshaw, J. D., Sandholm, S. T., Singh, H. B., Barrick, J. A., Harriss, R. C., Talbot, R. W., Shipham, M. A., Browell, E. V., Jacob, D. J., and Logan, J. A., Atmospheric chemistry in the Arctic and Subarctic: Influence of natural fires, industrial emissions, and stratospheric inputs: J. Geophys. Res., 97, 16,731-16,746, 1992.
Woodruff, L. G., and Cannon, W. F., Immediate and long-term fire effects on total mercury in forests soils of northeastern Minnesota: Environ. Sci. Technol., 44, 5371-5376, doi:10.1021/es100544d, 2010.
Wooster, M. J., Freeborn, P. H., Archibald, S., Oppenheimer, C., Roberts, G. J., Smith, T. E. L., Govender, N., Burton, M., and Palumbo, I., Field determination of biomass burning emission ratios and factors via open-path FTIR spectroscopy and fire radiative power assessment: headfire, backfire and residual smouldering combustion in African savannahs: Atmos. Chem. Phys., 11, 11,591-11,615, doi:10…
Worden, H., Beer, R., and Rinsland, C. P., Airborne infrared spectroscopy of 1994 western wildfires: J. Geophys. Res., 102, 1287-1299, 1997.
Yamasoe, M. A., Artaxo, P., Miguel, A. H., and Allen, A. G., Chemical composition of aerosol particles from direct emissions of vegetation fires in the Amazon Basin: water-soluble species and trace elements: Atmospheric Environment, 34, 1641-1653, 2000.
Yates, E. L., Iraci, L. T., Singh, H. B., Tanaka, T., Roby, M. C., Hamill, P., Clements, C. B., Lareau, N., Contezac, J., Blake, D. R., Simpson, I. J., Wisthaler, A., Mikoviny, T., Diskin, G. S., Beyersdorf, A. J., Choi, Y., Ryerson, T. B., Jimenez, J. L., Campuzano-Jost, P., Loewenstein, M., and Gore, W., Airborne measurements and emission estimates of greenhouse gases and other trace constituen…
Yedinak, K. M. (2013). Characterization of smoke plume emissions and dynamics from prescribed and wildland fires using high-resolution field observations and a coupled fire-atmosphere model. Ph.D. Thesis, Washington State University, 126 p.
Yokelson, R., Crounse, J. D., DeCarlo, P. F., Karl, T., Urbanski, S., Atlas, E., Campos, T., Shinozuka, Y., Kapustin, V., Clarke, A. D., Weinheimer, A., Knapp, D. J., Montzka, D. D., Holloway, J., Weibring, P., Flocke, F., Zheng, W., Toohey, D., Wennberg, P. O., Wiedinmyer, C., Mauldin, L., Fried, A., Richter, D., Walega, J., Jimenez, J. L., Adachi, K., Buseck, P. R., Hall, S. R., and Shetter, R.…
Yokelson, R. J., Griffith, D. W. T., and Ward, D. E., Open-path fourier-transform infrared studies of large-scale laboratory biomass fires: J. Geophys. Res., 101, 21,067-21,080, 1996.
Yokelson, R. J., Susott, R., Ward, D. E., Reardon, J., and Griffith, D. W. T., Emissions from smoldering combustion of biomass measured by open-path Fourier transform infrared spectroscopy: J. Geophys. Res., 102, 18,865-18,877, 1997.
Yokelson, R. J., Goode, J. G., Ward, D. E., Susott, R. A., Babbitt, R. E., Wade, D. D., Bertschi, I., Griffith, D. W. T., and Hao, W. M., Emissions of formaldehyde, acetic acid, methanol, and other trace gases from biomass fires in North Carolina measured by airborne Fourier transform infrared spectroscopy: J. Geophys. Res., 104, 30,109-30,125, 1999a.
Yokelson, R. J., Griffith, D. W. T., Susott, R. A., and Ward, D. E., Spectroscopic studies of biomass fire emissions, in International Perspectives on Landscape Fires, edited by J. Greenlee, Fairfield, Wash., 1999b, in press.
Yokelson, R. J., Bertschi, I. T., Christian, T. J., Hobbs, P. V., Ward, D. E., and Hao, W. M., Trace gas measurements in nascent, aged, and cloud-processed smoke from African savanna fires by airborne Fourier transform infrared spectroscopy (AFTIR): J. Geophys. Res., 108, 8478, doi:10.1029/2002JD002322, 2003.
Yokelson, R. J., Urbanski, S. P., Atlas, E. L., Toohey, D. W., Alvarado, E. C., Crounse, J. D., Wennberg, P. O., Fisher, M. E., Wold, C. E., Campos, T. L., Adachi, K., Buseck, P. R., and Hao, W. M., Emissions from forest fires near Mexico City: Atmos. Chem. Phys., 7, 5569-5584, 2007.
Yokelson, R. J., Christian, T. J., Karl, T. G., and Guenther, A., The tropical forest and fire emissions experiment: laboratory fire measurements and synthesis of campaign data: Atmos. Chem. Phys., 8, 3509-3527, 2008.
Yokelson, R. J., Burling, I. R., Urbanski, S. P., Atlas, E. L., Adachi, K., Buseck, P. R., Wiedinmyer, C., Akagi, S. K., Toohey, D. W., and Wold, C. E., Trace gas and particle emissions from open biomass burning in Mexico: Atmos. Chem. Phys., 11, 6,787-6,808, doi:10.5194/acp-11-6787-2011, 2011.
Yokelson, R. J., Burling, I. R., Gilman, J. B., Warneke, C., Stockwell, C. E., De Gouw, J., Akagi, S. K., Urbanski, S. P., Veres, P., Roberts, J. M., Kuster, W. C., Reardon, J., Griffith, D. W. T., Johnson, T. J., Hosseini, S., Miller, J. W., Cocker III, D. R., Jung, H., and Weise, D. R., Coupling field and laboratory measurements to estimate the emission factors of identified and unidentified tr…
Yonemura, S., and Kawashima, S., Concentrations of carbon gases and oxygen and their emission ratios from the combustion of rice hulls in a wind tunnel: Atmospheric Environment, 41, 1407-1416, doi:10.1016/j.atmosenv.2006.10.015, 2007.
Zarzana, K. J., Min, K.-E., Washenfelder, R. A., Kaiser, J., Krawiec-Thayer, M., Peischl, J., Neuman, J. A., Nowak, J. B., Wagner, N. L., Dubè, W. P., St. Clair, J. M., Wolfe, G. M., Hanisco, T. F., Keutsch, F. N., Ryerson, T. B., and Brown, S. S., Emissions of glyoxal and other carbonyl compounds from agricultural biomass burning plumes sampled by aircraft: Environ. Sci. Technol., 51, 11761-1177…
Zarzana, K. J., Selimovic, V., Koss, A. R., Sekimoto, K., Coggon, M. M., Yuan, B., Dubé, W. P., Yokelson, R. J., Warneke, C., de Gouw, J. A., Roberts, J. M., and Brown, S. S., Primary emissions of glyoxal and methylglyoxal from laboratory measurements of open biomass burning: Atmos. Chem. Phys., 18, 15,451-15,470, doi:10.5194/acp-18-15451-2018, 2018.
Zhang, H. F., Ye, X. N., Cheng, T. T., Chen, J. M., Yang, X., Wang, L., and Zhang, R. Y., A laboratory study of agricultural crop residue combustion in China: Emission factors and emission inventory: Atmospheric Environment, 42, 8432-8441, doi:10.1016/j.atmosenv.2008.08.015, 2008.
Zhang, J., and Smith, K. R., Hydrocarbon emissions and health risks from cookstoves in developing countries: Journal of Exposure Analysis and Environmental Epidemiology, 6, 147-161, 1996.
Zhang, J., and Smith, K. R., Emissions of carbonyl compounds from various cookstoves in China: Environ. Sci. Tech., 33, 2311-2320, 1999.
Zhang, J., Smith, K. R., Uma, R., Ma, Y., Kishore, V. V. N., Lata, K., Khalil, M. A. K., Rasmussen, R. A., and Thorneloe, S. T., Carbon monoxide from cookstoves in developing countries: 1. Emission factors: Chemosphere: Global Change Science, 1, 353-366, 1999.
Zhang, J., Smith, K. R., Ma, Y., Ye, S., Jiang, F., Qi, W., Liu, P., Khalil, M. A. K., Rasmussen, R. A., and Thorneloe, S. A., Greenhouse gases and other airborne pollutants from household stoves in China: a database for emission factors: Atmospheric Environment, 34, 4537-4549, 2000.
Zhang, T., Wooster, M. J., Green, D. C., and Main, B., New field-based agricultural biomass burning trace gas, PM2.5, and black carbon emission ratios and factors measured in situ at crop residue fires in Eastern China: Atmospheric Environment, 121, 22-34, doi:10.1016/j.atmosenv.2015.05.010, 2015.
Zhang, W., Wei, W., Hu, D., Zhu, Y., and Wang, X., Emission of speciated mercury from residential biomass fuel combustion in China: Energy & Fuels, 27, 6792-6800, doi:10.1021/ef401564r, 2013.
Zhuang, Y.-H., Cao, M., Wang, X., and Yao, H., Spatial distribution of trace gas emissions from burning crop residue in China, in Biomass Burning and Global Change, edited by J. S. Levine, pp. 764-770, MIT Press, Cambridge, Mass., 1996.
